# Supplementary material for: Intact Transition Epitope Mapping—Force Differences between Original and Unusual Residues (ITEM-FOUR)
Source: MDPI journal article supplement (doi:10.3390/biom13010187), 2023-01-16
Supplement: s1 [file s1]

Supplement

# Intact Transition Epitope Mapping–Force differences between Original and Unusual Residues (ITEM-FOUR)

Claudia Röwer <sup>1</sup>, Christian Ortmann <sup>2</sup>, Andrei Neamtu <sup>3</sup>, Reham F. El-Kased <sup>4</sup>, and Michael O. Glocker <sup>1,\*</sup>

<sup>1</sup> Proteome Center Rostock, University Medicine Rostock and University of Rostock, Schillingallee 69, 18059 Rostock, Germany; claudia.roewer@uni-rostock.de

<sup>2</sup> Waters GmbH | TA Instruments, Helfmann-Park 10, 65760 Eschborn, Germany; christian\_ortmann@waters.com

<sup>3</sup> TRANSCEND Centre – Regional Institute of Oncology (IRO) Iasi, Str. General Henri Mathias Berthelot, Nr. 2–4, 700483 Iași, România; andrei.neamtu@umfiasi.ro

<sup>4</sup> Department of Microbiology & Immunology, Faculty of Pharmacy, The British University in Egypt, Suez Rd, 11837 EL Sherouk City, Egypt

\* Correspondence: reham.kased@bue.edu.eg (R.F.E.-K.); michael.glocker@uni-rostock.de (M.O.G.); Tel.: +49-381-494-4930 (M.O.G.)

**Abstract:** Antibody-based point-of-care diagnostics have become indispensable for modern medicine. In-depth analysis of antibody recognition mechanisms is the key to tailoring the accuracy and precision of test results, which themselves are crucial for targeted and personalized therapy. A rapid and robust method is desired by which binding strengths between antigens and antibodies of concern can be fine-mapped with amino acid residue resolution to examine the assumedly serious effects of single amino acid polymorphisms on insufficiencies of antibody-based detection capabilities of, e.g., life-threatening conditions such as myocardial infarction. The experimental ITEM-FOUR approach makes use of modern mass spectrometry instrumentation to investigate intact immune complexes in the gas phase. ITEM-FOUR together with molecular dynamics simulations, enables the determination of the influences of individually exchanged amino acid residues within a defined epitope on an immune complex's binding strength. Wild-type and mutated epitope peptides were ranked according to their experimentally determined dissociation enthalpies relative to each other, thereby revealing which single amino acid polymorphism caused weakened, impaired, and even abolished antibody binding. Investigating a diagnostically relevant human cardiac Troponin I epitope for which seven nonsynonymous single nucleotide polymorphisms are known to exist in the human population tackles a medically relevant but hitherto unsolved problem of current antibody-based point-of-care diagnostics.

**Keywords:** ITEM-FOUR; nanoESI mass spectrometry; immune complex analysis; personalized genomics; single amino acid polymorphism

## Röwer et al. Supplemental Figures

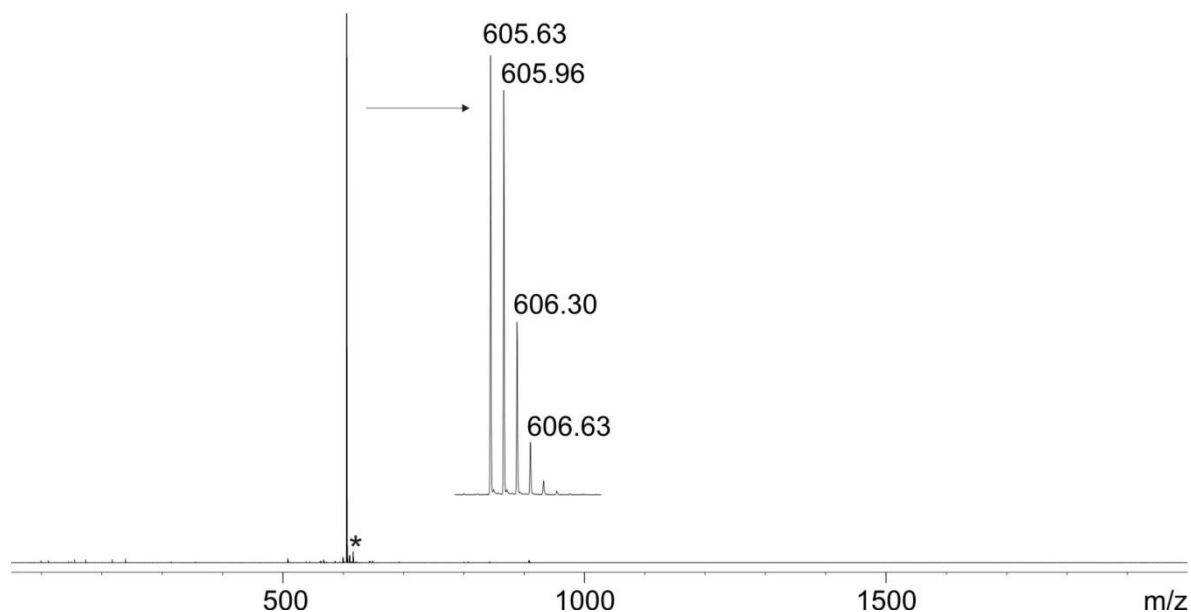

**Figure S1.** Nano-ESI mass spectrum of Troponin I peptide 1 (ENREVGDWKRNIDAL). The  $m/z$  values of the isotopically resolved triply charged peptide ion signal are given. \*: sodium adduct. Solvent: 2% acetic acid, 10% methanol.

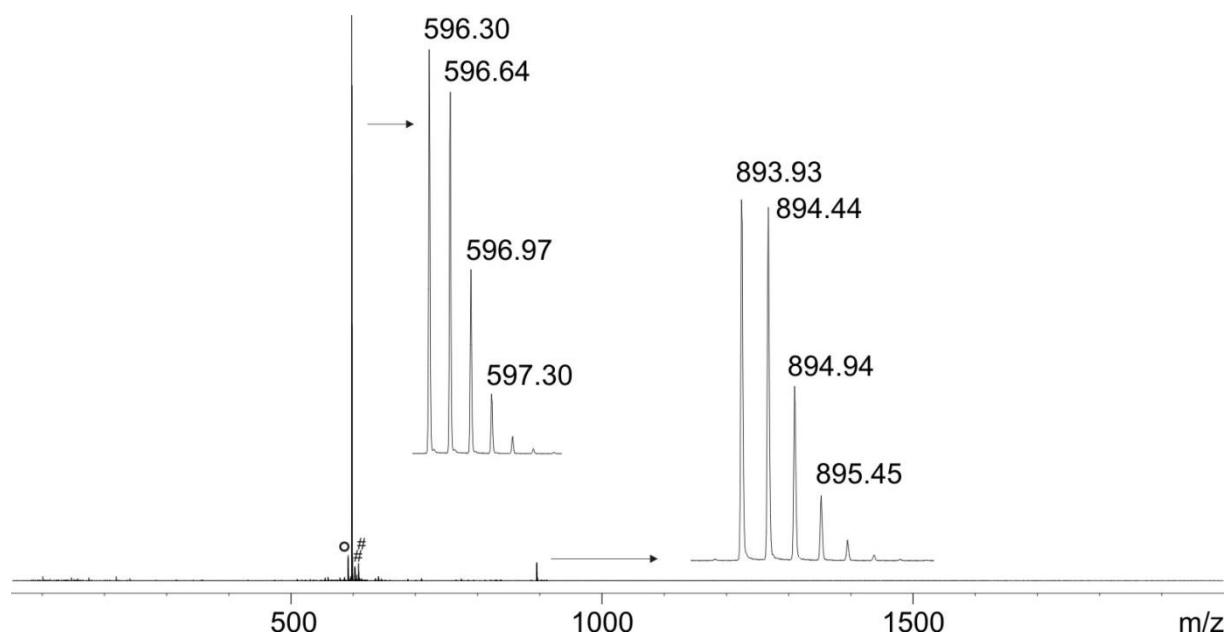

**Figure S2.** Nano-ESI mass spectrum of Troponin I peptide 2 (ENQEVGDWRKNIDAL). The  $m/z$  values of the isotopically resolved triply and doubly charged peptide ion signals are given. #: oxidation; °: loss of water. Solvent: 2% acetic acid, 10% methanol.

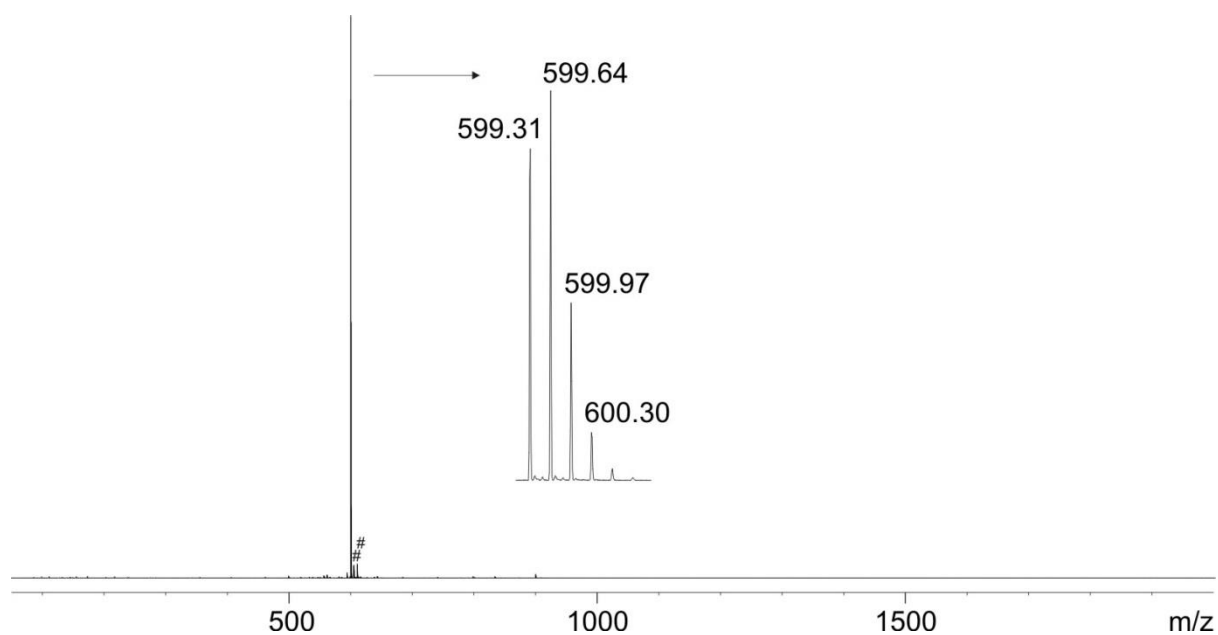

**Figure S3.** Nano-ESI mass spectrum of Troponin I peptide 3 (ENREVGDWLHKNDAL). The  $m/z$  values of the isotopically resolved triply charged peptide ion signal are given. #: oxidation. Solvent: 2% acetic acid, 10% methanol.

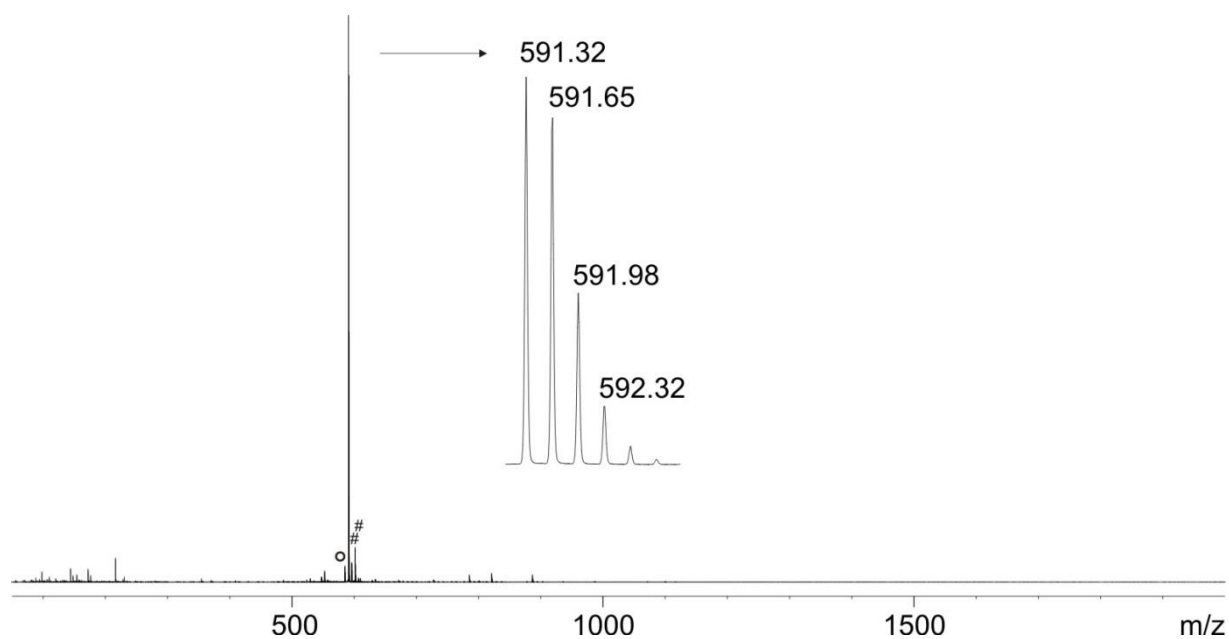

**Figure S4.** Nano-ESI mass spectrum of Troponin I peptide 4 (ENREVGDWLKNIDAL). The  $m/z$  values of the isotopically resolved triply charged peptide ion signal are given. #: oxidation; °: loss of water. Solvent: 2% acetic acid, 10% methanol.

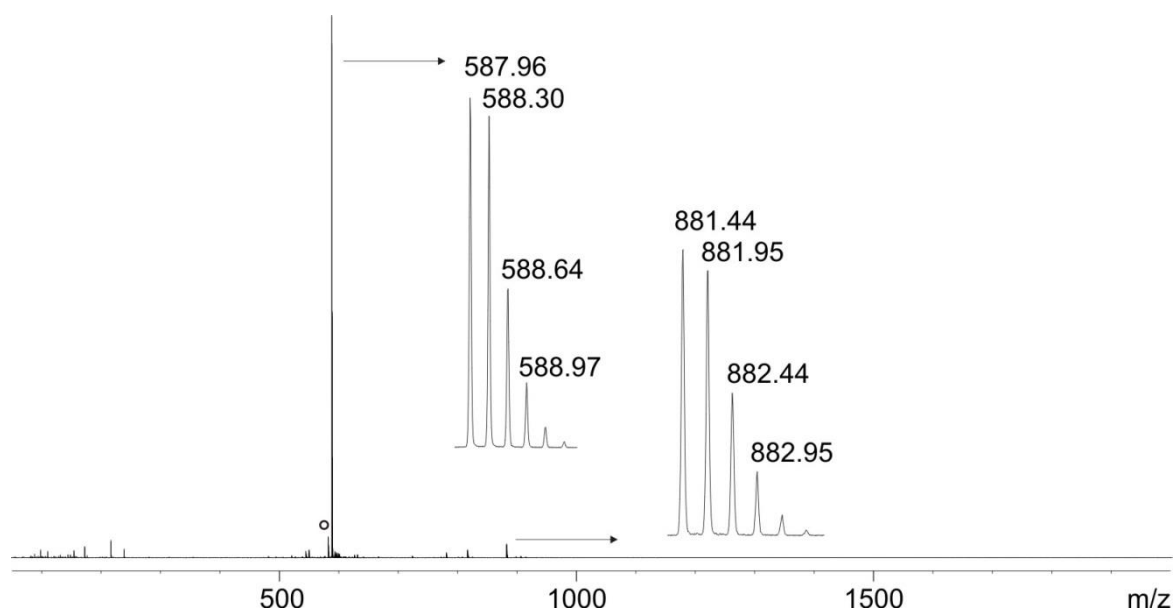

**Figure S5.** Nano-ESI mass spectrum of Troponin I peptide 5 (ENREVGDWCKNIDAL). The  $m/z$  values of the isotopically resolved triply and doubly charged peptide ion signals are given. °: loss of water. Solvent: 2% acetic acid, 10% methanol.

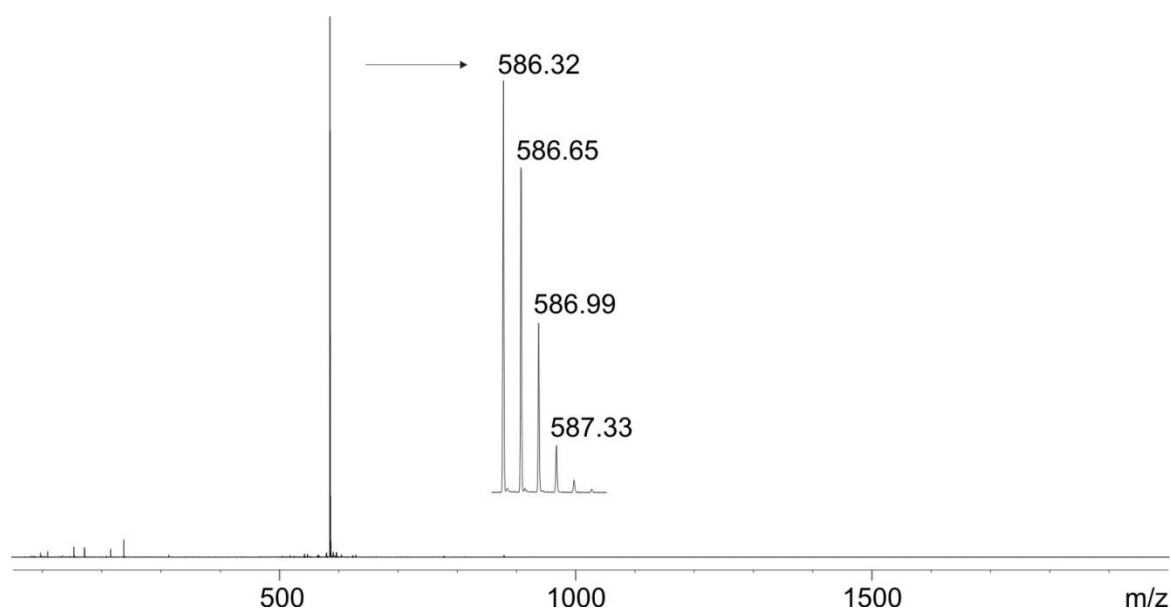

**Figure S6.** Nano-ESI mass spectrum of Troponin I peptide 6 (ENREVGGWCKNIDAL). The  $m/z$  values of the isotopically resolved triply charged peptide ion signal are given. Solvent: 2% acetic acid, 10% methanol.

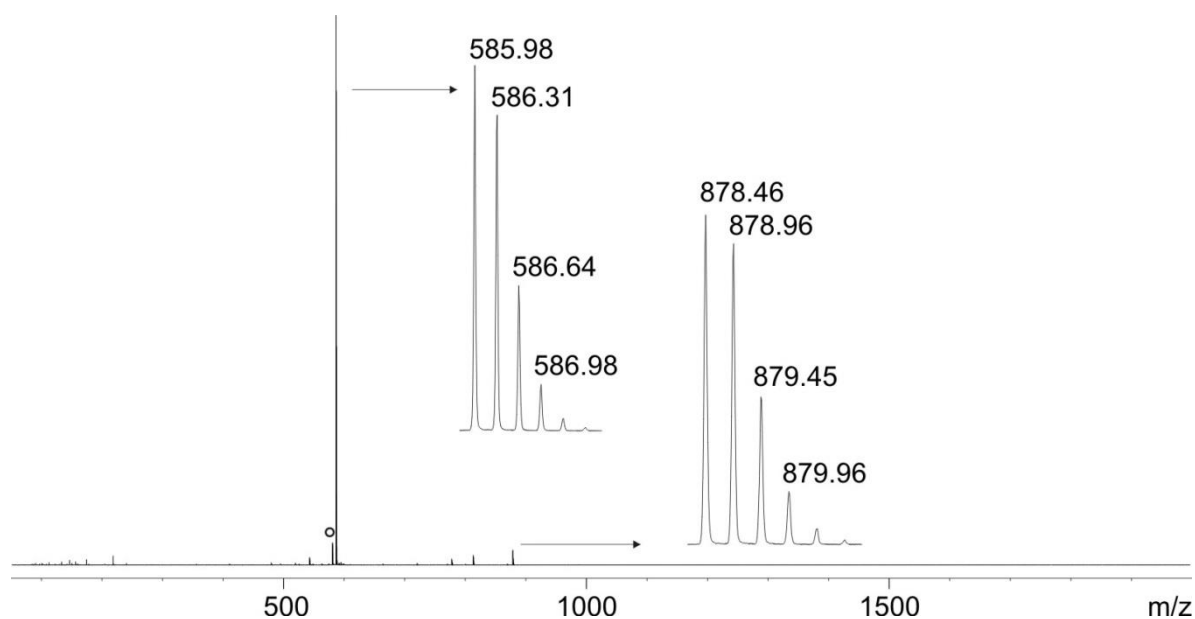

**Figure S7.** Nano-ESI mass spectrum of Troponin I peptide 7 (ENREVGDWPKNIDAL). The  $m/z$  values of the isotopically resolved triply and doubly charged peptide ion signals are given. °: loss of water. Solvent: 2% acetic acid, 10% methanol.

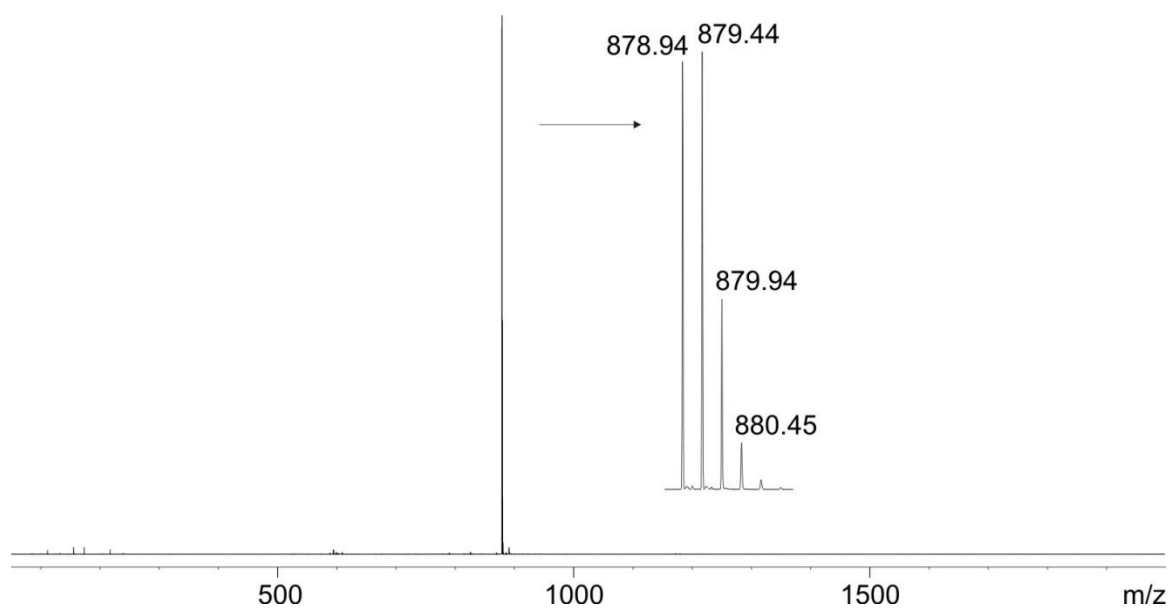

**Figure S8.** Nano-ESI mass spectrum of Troponin I peptide 8 (ENREVGDWPENIDAL). The  $m/z$  values of the isotopically resolved doubly charged peptide ion signal are given. Solvent: 2% acetic acid, 10% methanol.

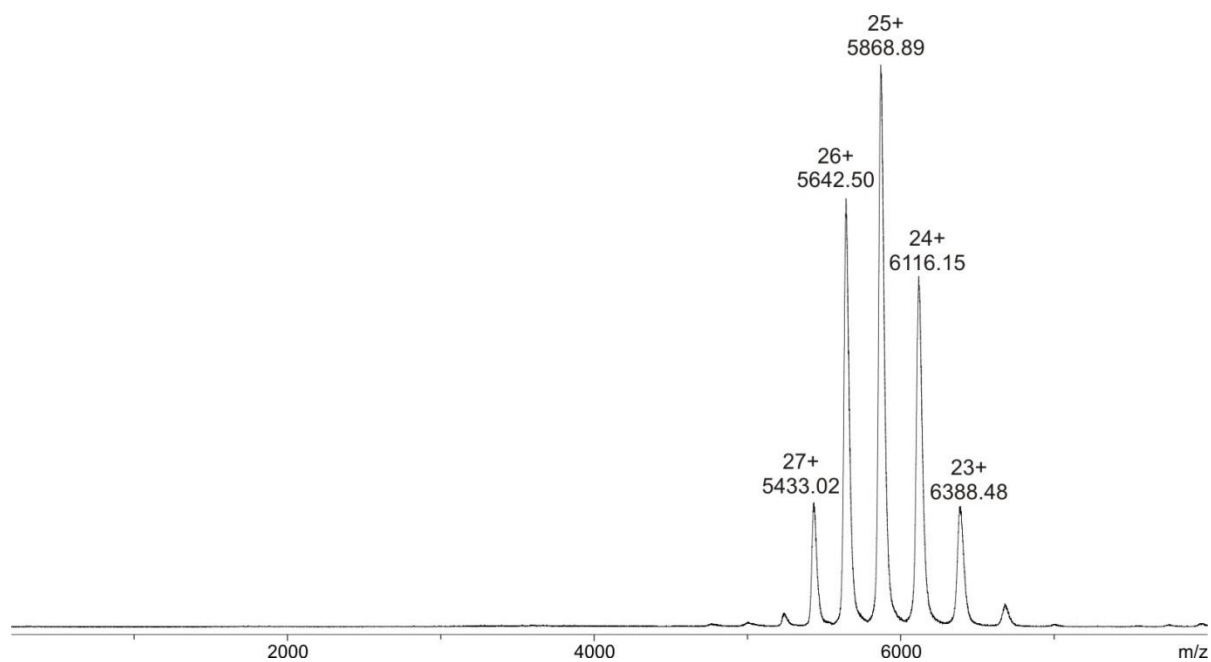

**Figure S9.** Nano-ESI mass spectra of the anti-Troponin I antibody. Charge states and m/z values are given. Solvent: 200 mM ammonium acetate, pH 6.7.

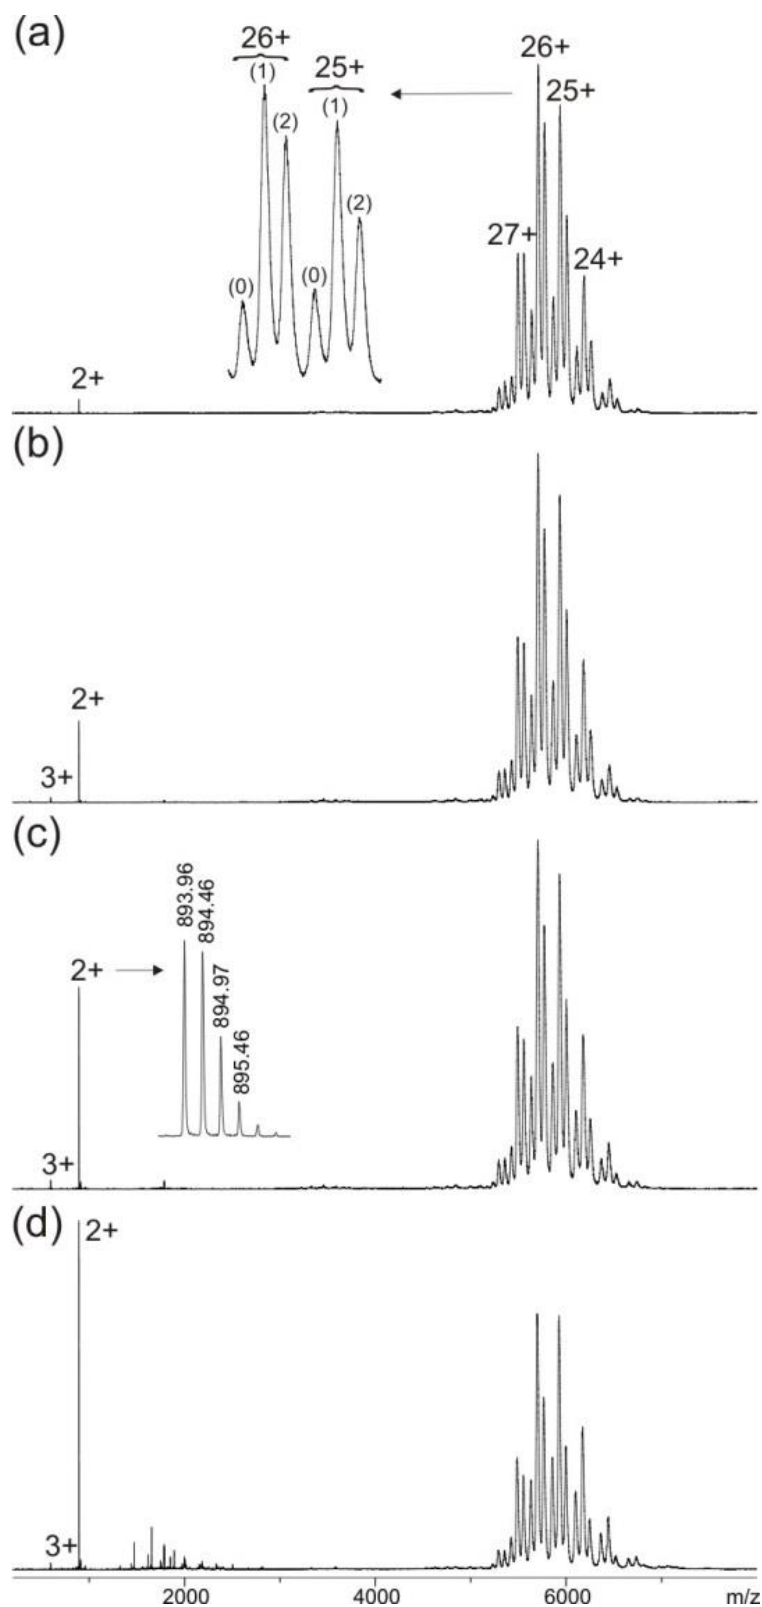

**Figure S10.** Nano-ESI mass spectra of Troponin I peptide 2 (ENQEVGDWRKNIDAL) – anti-Troponin I antibody immune complex with increasing collision cell voltage differences ( $\Delta CV$ ): (a) 4 V, (b) 16 V, (c) 30 V, (d) 80 V. Charge states are given for the immune complex (right ion series) and inlet in (a) shows a zoom of the 25+ and 26 + ion signals of the antibody (0) and the immune complex (antibody plus one peptide (1) and antibody plus two peptides (2)). Charge states and  $m/z$  values for peptide ion signals are given on the left and inlet in (c) shows a zoom of the isotopically resolved peptide ion signal. Antibody fragment ion signals are visible between  $m/z$  1200 and 2300 in (d). Solvent: 200 mM ammonium acetate, pH 6.7.

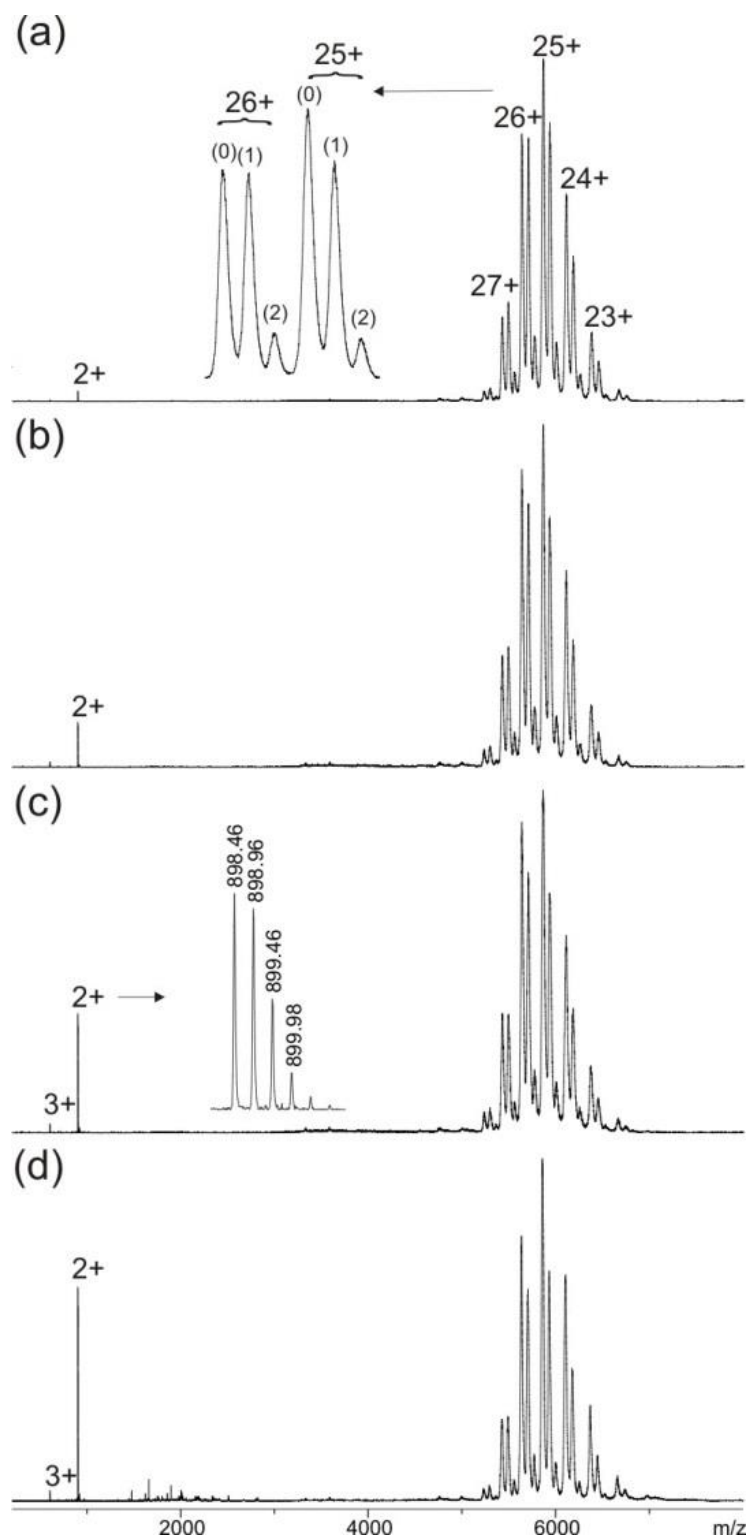



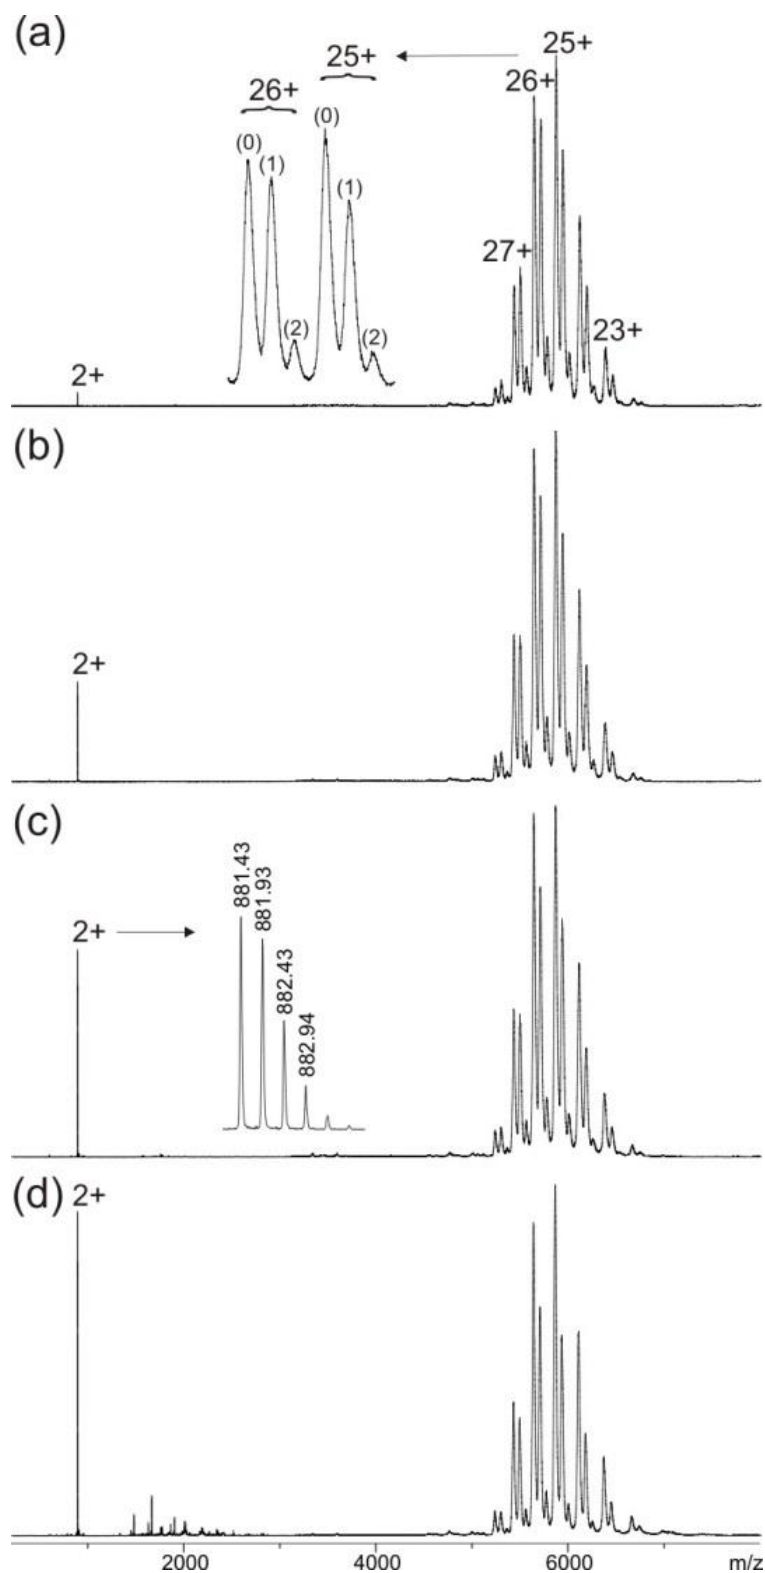

**Figure S12.** Nano-ESI mass spectra of Troponin I peptide 5 (ENREVGDWCKNIDAL) – anti-Troponin I antibody immune complex with increasing collision cell voltage differences ( $\Delta CV$ ): (a) 4 V, (b) 16 V, (c) 30 V, (d) 80 V. Charge states are given for the immune complex (right ion series) and inlet in (a) shows a zoom of the 25+ and 26 + ion signals of the antibody (0) and the immune complex (antibody plus one peptide (1) and antibody plus two peptides (2)). Charge states and  $m/z$  values for peptide ion signals are given on the left and inlet in (c) shows a zoom of the isotopically resolved peptide ion signal. Antibody fragment ion signals are visible between  $m/z$  1200 and 2300 in (d). Solvent: 200 mM ammonium acetate, pH 6.7.

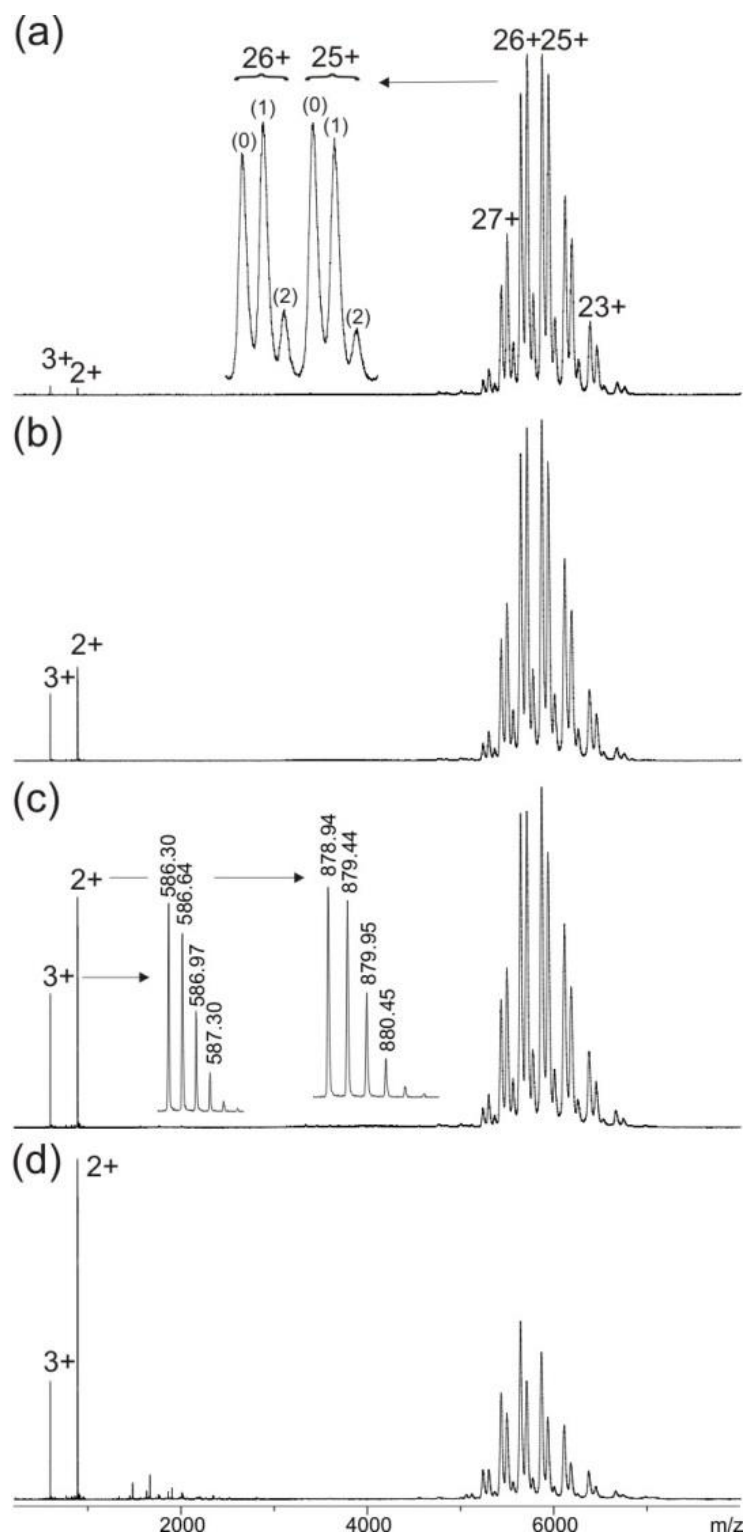

**Figure S13.** Nano-ESI mass spectra of Troponin I peptide 6 (ENREVGWWRKNIDAL) – anti-Troponin I antibody immune complex with increasing collision cell voltage differences ( $\Delta CV$ ): (a) 4 V, (b) 16 V, (c) 30 V, (d) 80 V. Charge states are given for the immune complex (right ion series) and inlet in (a) shows a zoom of the  $25^+$  and  $26^+$  ion signals of the antibody (0) and the immune complex (antibody plus one peptide (1) and antibody plus two peptides (2)). Charge states and  $m/z$  values for peptide ion signals are given on the left and inlet in (c) shows a zoom of the isotopically resolved peptide ion signals. Antibody fragment ion signals are visible between  $m/z$  1200 and 2300 in (d). Solvent: 200 mM ammonium acetate, pH 6.7.

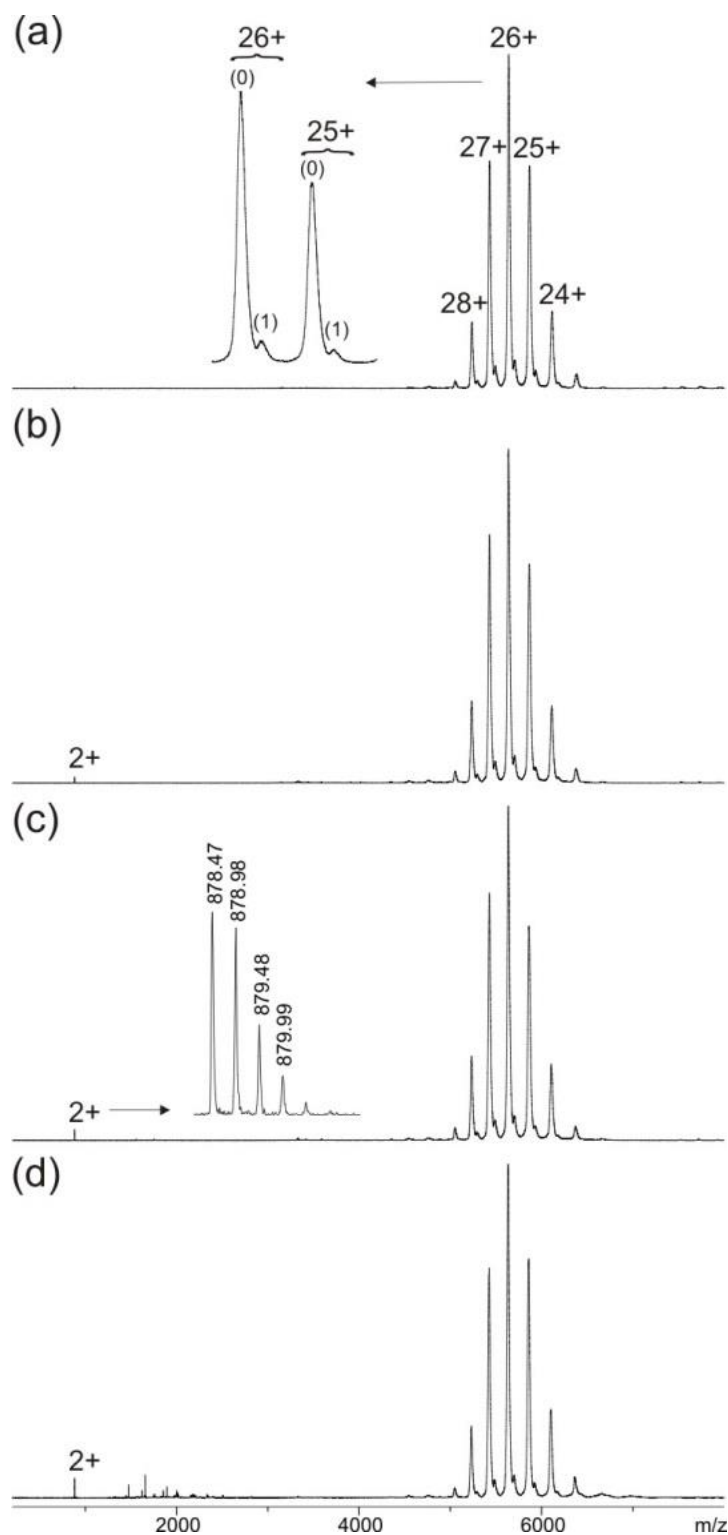

**Figure S14.** Nano-ESI mass spectra of Troponin I peptide 7 (ENREVGDWPKNIDAL) – anti-Troponin I antibody immune complex with increasing collision cell voltage differences ( $\Delta CV$ ): (a) 4 V, (b) 16 V, (c) 30 V, (d) 80 V. Charge states are given for the immune complex (right ion series) and inlet in (a) shows a zoom of the 25+ and 26 + ion signals of the antibody (0) and the immune complex (antibody plus one peptide (1)). Charge states and  $m/z$  values for peptide ion signals are given on the left and inlet in (c) shows a zoom of the isotopically resolved peptide ion signal. Antibody fragment ion signals are visible between  $m/z$  1200 and 2300 in (d). Solvent: 200 mM ammonium acetate, pH 6.7.

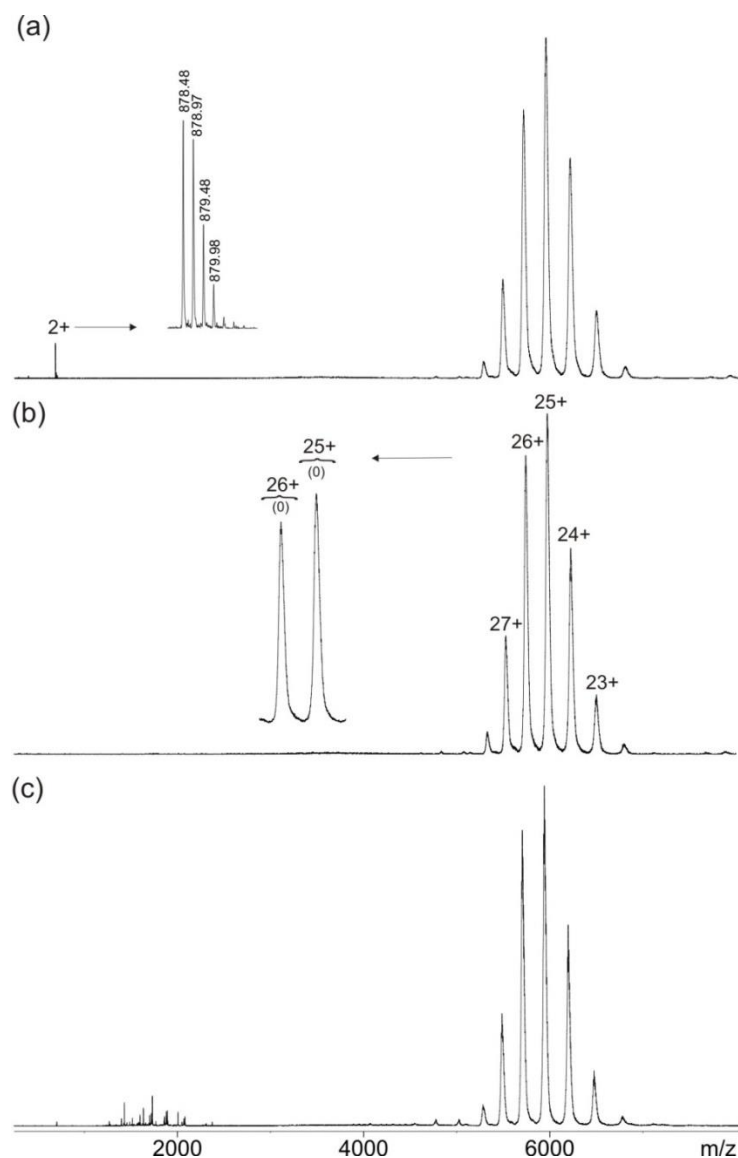

**Figure S15.** Nano-ESI mass spectra of Troponin I peptide 7 (ENREVGDWPKNIDAL) upon incubation with anti-Histag antibody with (a) unblocked ion transmission and collision cell voltage difference of 2 V (inlet shows zoom of the peptide ion signal) and (b) with blocked transmission of low mass ions (< 4800) and collision cell voltage differences of 2V and (c) with blocked transmission of low mass ion (< 4800) and collision cell voltage differences of 80V. Charge states are given for the antibody ion signal (right ion series) and inlet in (b) shows a zoom of the 25+ and 26 + ion signals of the antibody (0). Antibody fragment ion signals are visible between  $m/z$  1200 and 2300 in (c). Solvent: 200 mM ammonium acetate, pH 6.7.

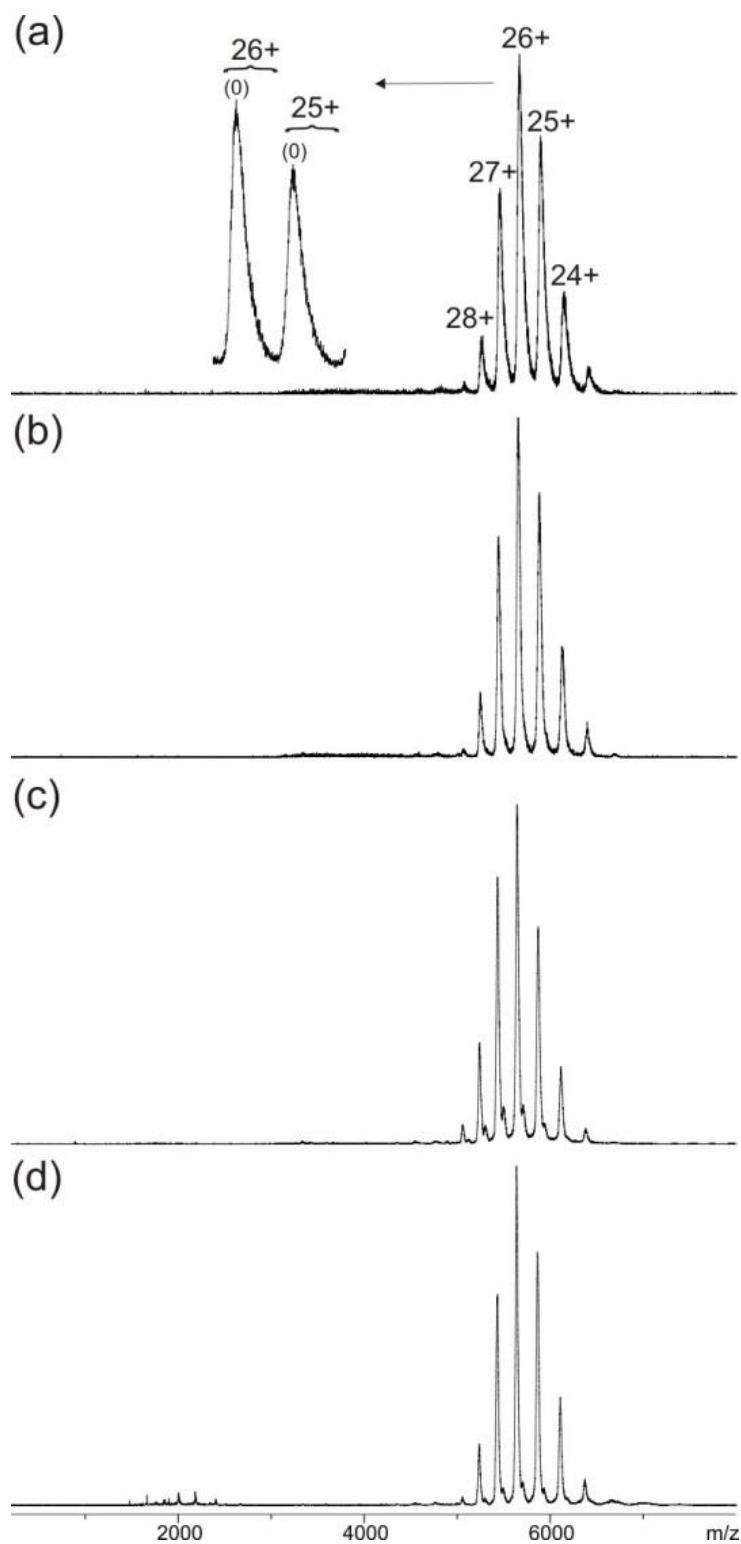

**Figure S16.** Nano-ESI mass spectra of Troponin I peptide 8 (ENREVGDWPENIDAL) after incubation with anti-Troponin I antibody with increasing collision cell voltage differences ( $\Delta CV$ ): (a) 4 V, (b) 16 V, (c) 30 V, (d) 80 V. Charge states are given for the antibody ion signal (right ion series) and inset in (a) shows a zoom of the 25+ and 26 + ion signals of the antibody (0). Antibody fragment ion signals are visible between  $m/z$  1200 and 2300 in (d). Solvent: 200 mM ammonium acetate, pH 6.7.

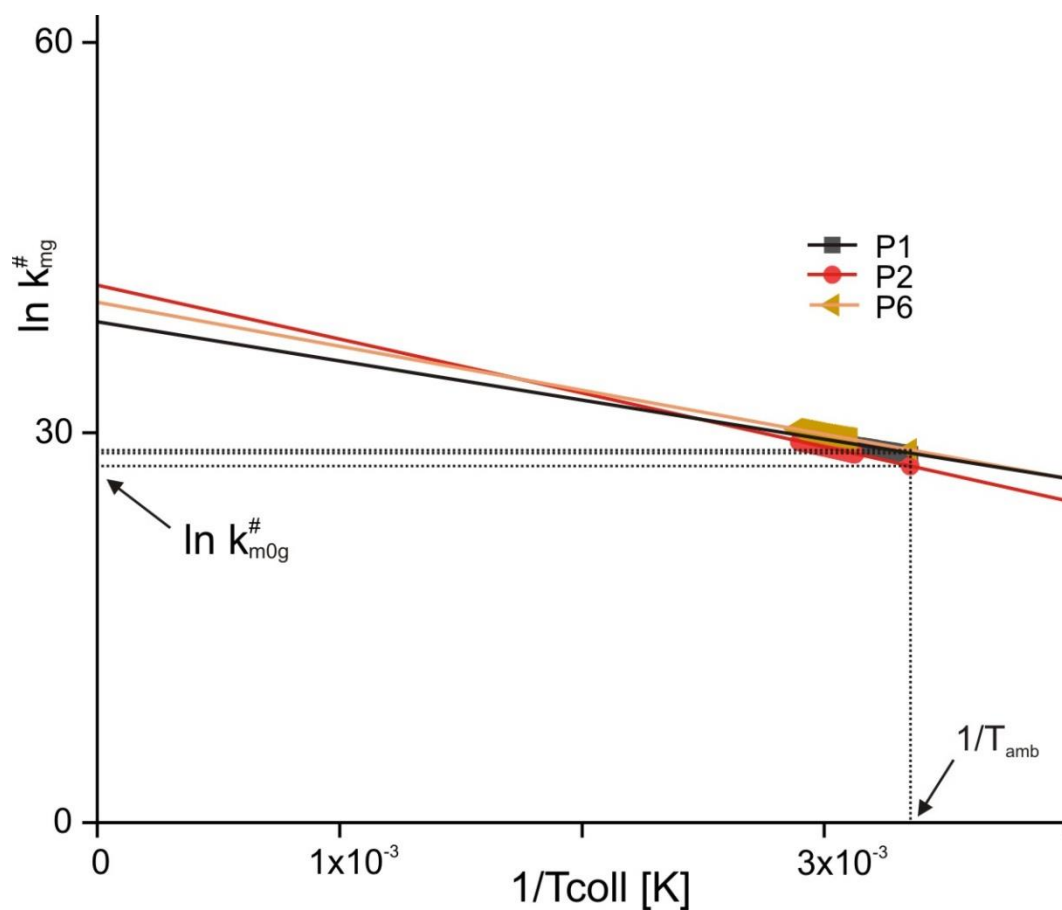

**Figure S17.** Arrhenius plot for the immune complex dissociations of anti-hcTroponin I antibody and human cardiac Troponin I peptides 1 (black square), 2 (red circle), and 6 (orange triangle) in the gas phase. Each data point (thickened parts of the lines) has been obtained experimentally, corresponding lines have been extrapolated linearly. The values for  $\ln k_{m0g}^{\#}$  are taken at  $1/T_{amb}$ .

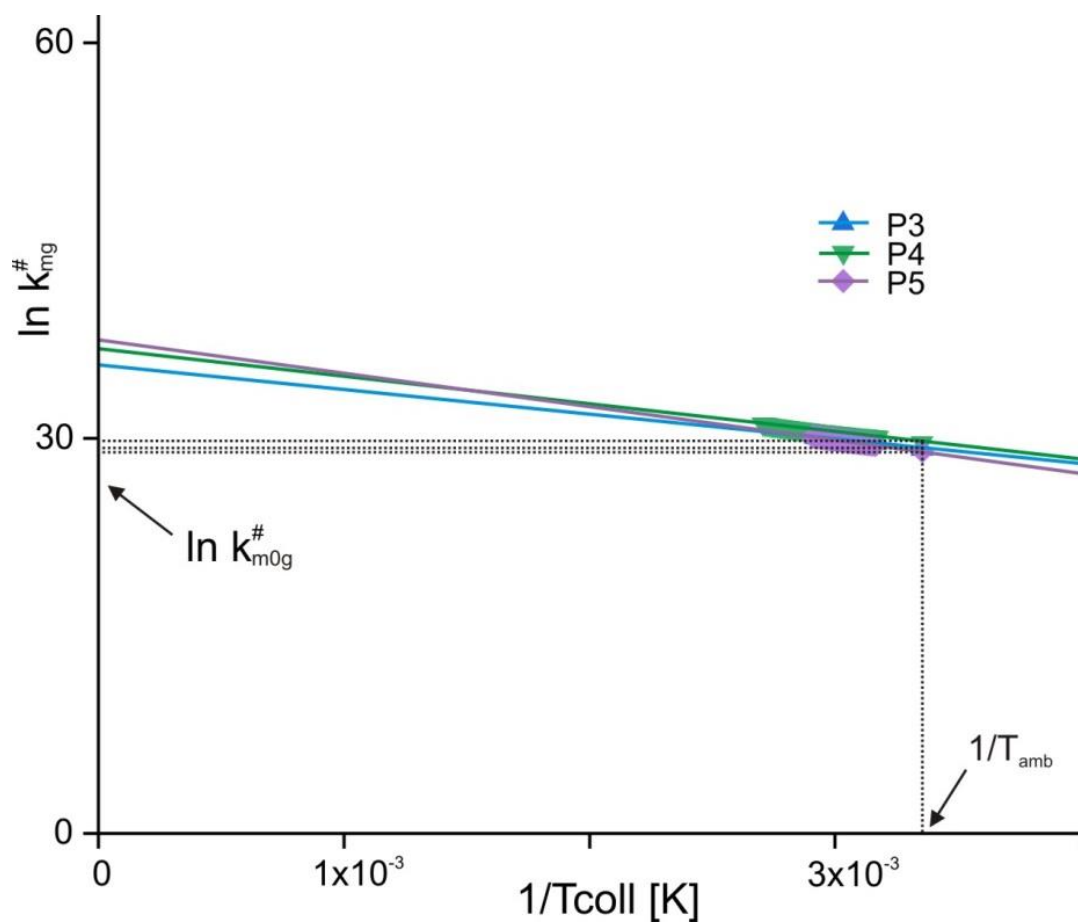

**Figure S18.** Arrhenius plot for the immune complex dissociations of anti-hcTroponin I antibody and human cardiac Troponin I peptides 3 (blue triangle), 4 (green triangle), and 5 (purple square) in the gas phase. Each data point (thickened parts of the lines) has been obtained experimentally, corresponding lines have been extrapolated linearly. The values for  $\ln k_{m0g}^{\#}$  are taken at  $1/T_{amb}$ .

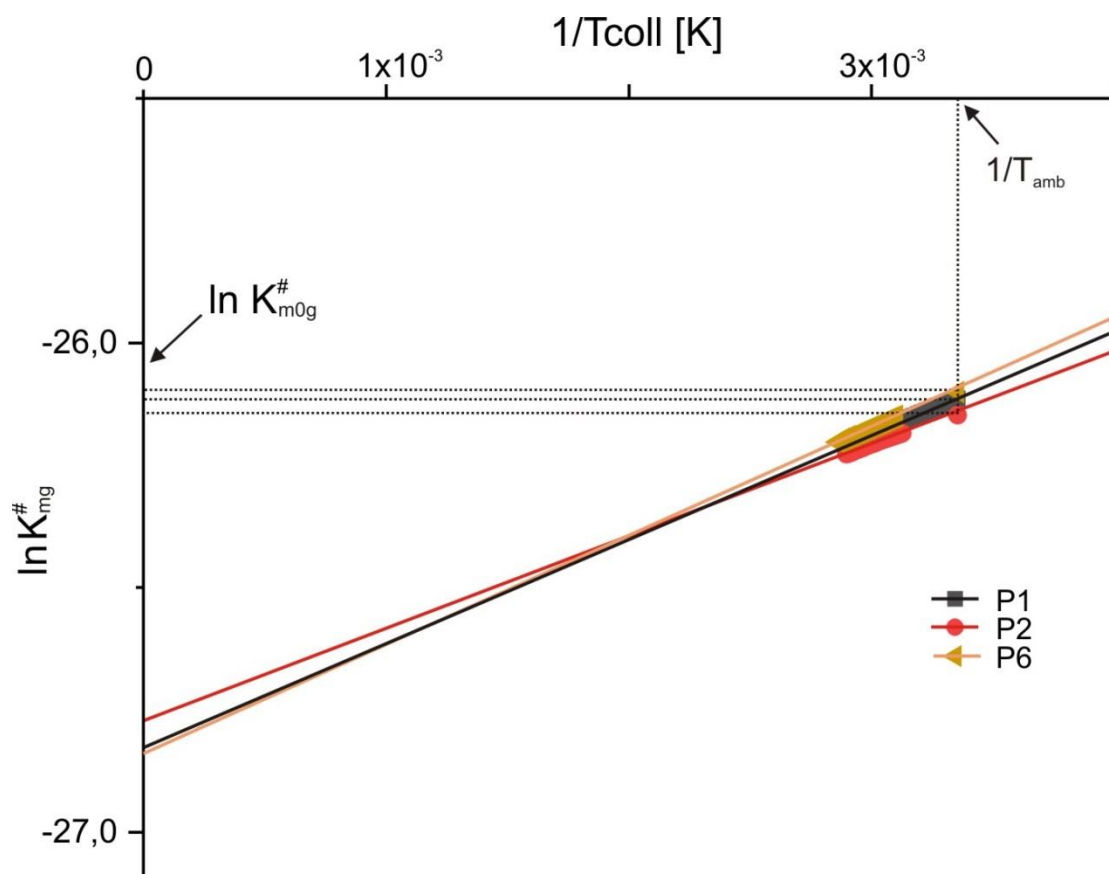

**Figure S19.** Gibbs-Helmholtz plot for the immune complex dissociations of anti-hcTroponin I antibody and human cardiac Troponin I peptides 1 (black square), 2 (red circle), and 6 (orange triangle) in the gas phase. Each data point (thickened parts of the lines) has been obtained experimentally, corresponding lines have been extrapolated linearly. The values for  $\ln K_{m0g}^{\#}$  are taken at  $1/T_{amb}$ . Calculated kinetic and thermodynamic values are listed in Table 3.



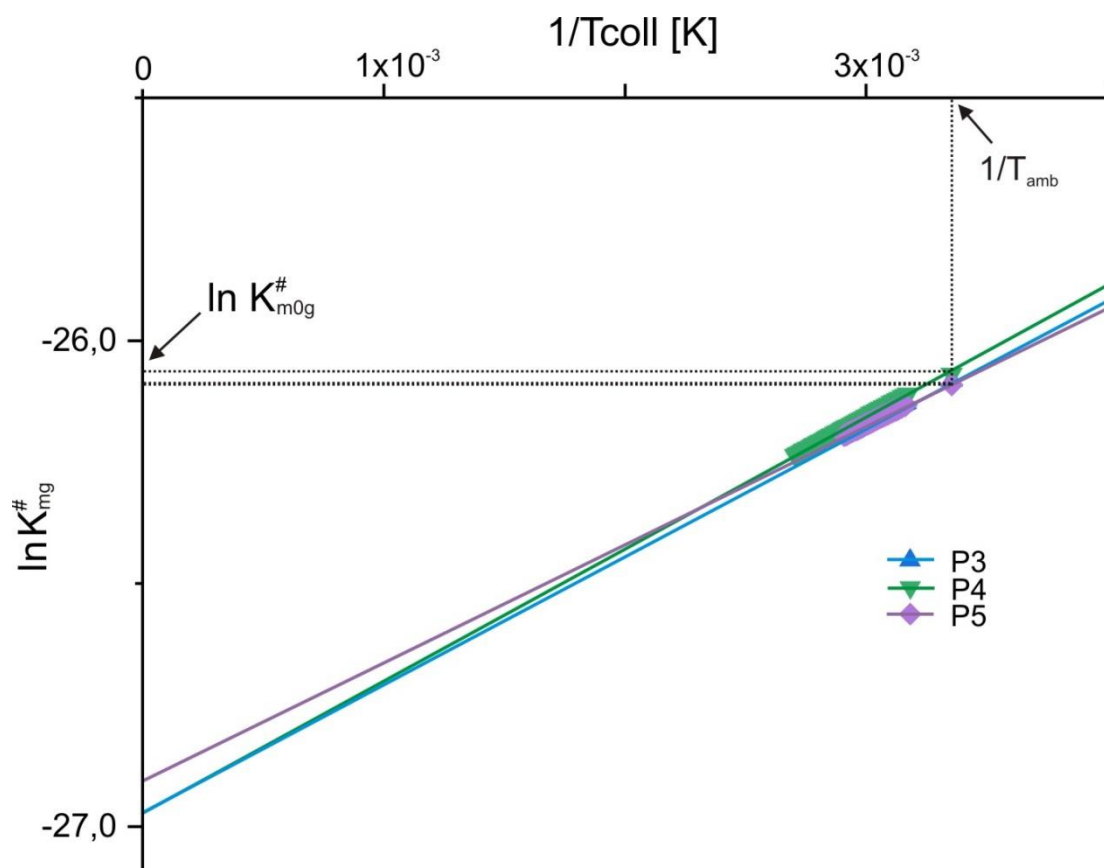

**Figure S20.** Gibbs-Helmholtz plot for the immune complex dissociations of anti-hcTroponin I antibody and human cardiac Troponin I peptides 3 (blue triangle), 4 (green triangle), and 5 (purple square) in the gas phase. Each data point (thickened parts of the lines) has been obtained experimentally, corresponding lines have been extrapolated linearly. The values for  $\ln K_{m0g}^{\#}$  are taken at  $1/T_{amb}$ . Calculated kinetic and thermodynamic values are listed in Table 3.

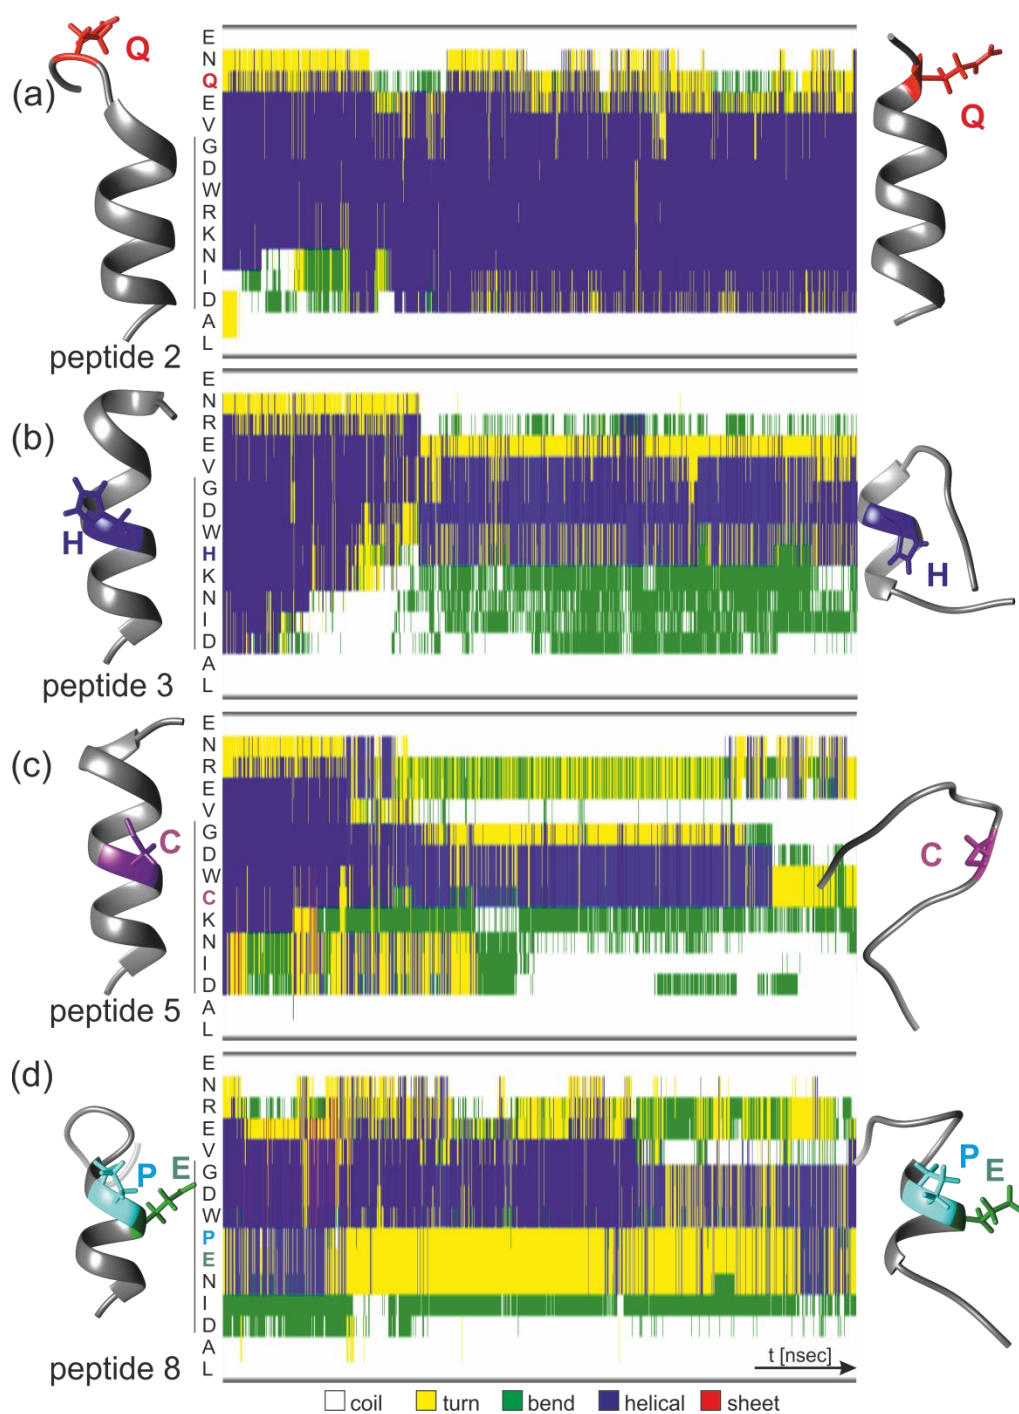

**Figure S21.** Peptide structure models and secondary structure elements prior to and after molecular dynamics simulations. Predicted epitope peptide model structures (left) were compared to structure models after 50 ns simulation (right). (a) peptide 2, (b) peptide 3, (c) peptide 5, and (d) peptide 8. Amino acid residues of peptides are listed from top to bottom (center). The vertical line at the left indicates the epitope region. The secondary structure element into which each residue is involved in at a given simulation time point is depicted from left to right as color coded bar (10,000 bars per line). Color code: white: coil; yellow: turn; green: bend; blue: helical; red: sheet.

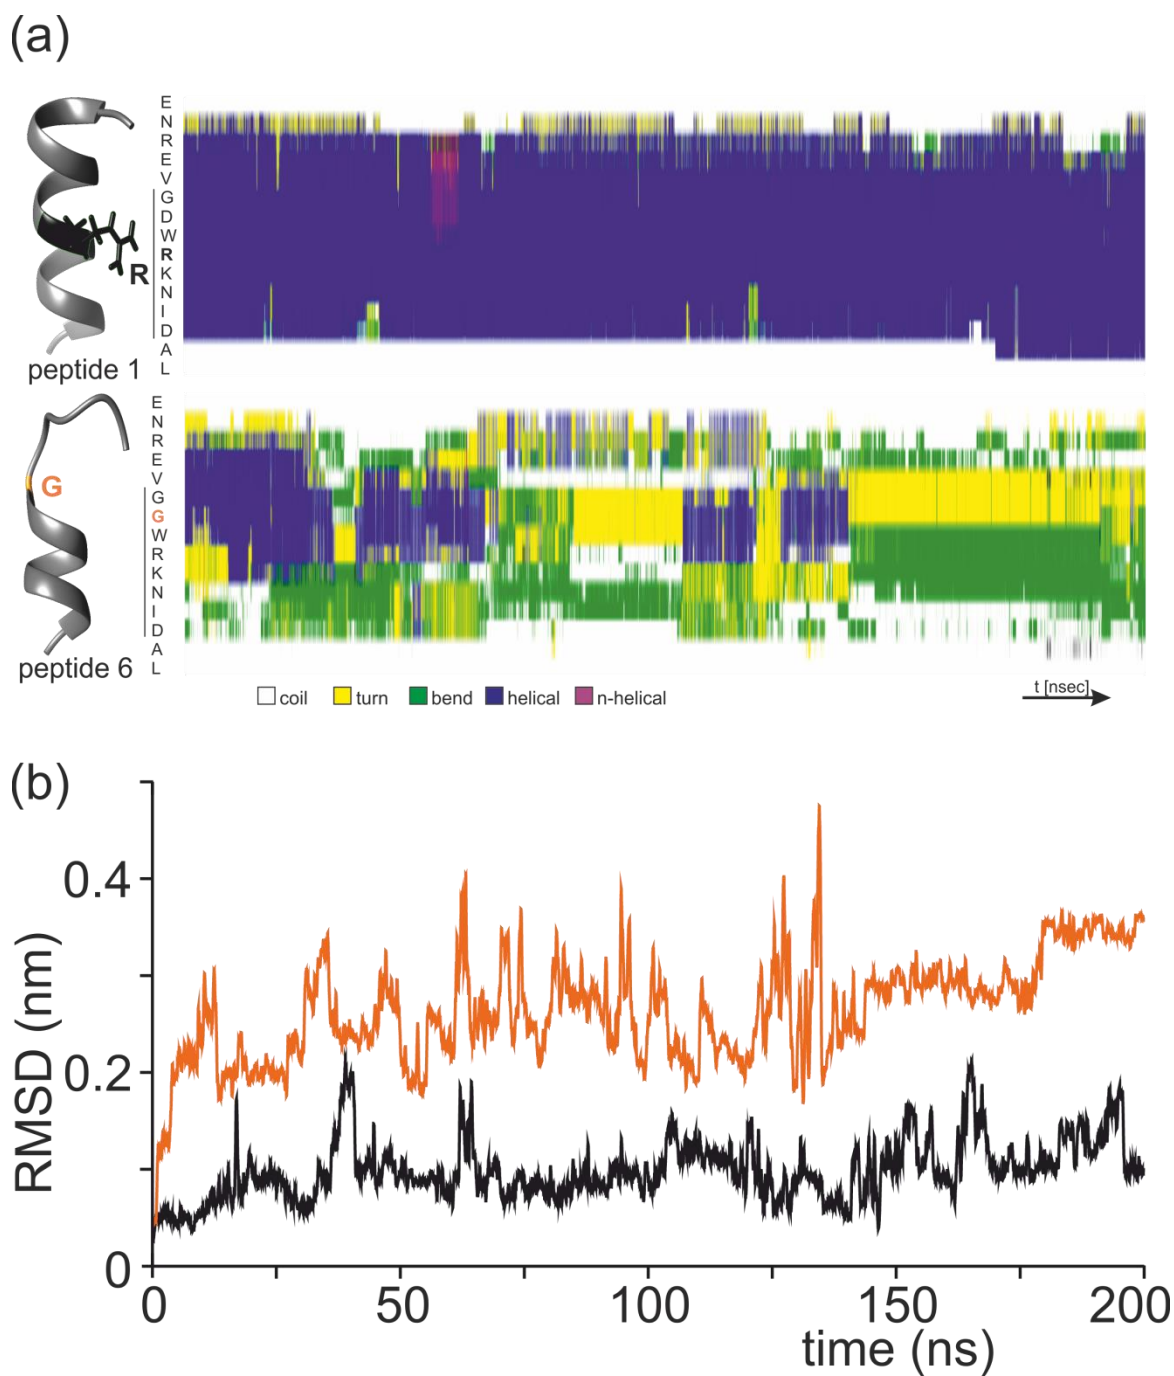

**Figure S22.** Peptide structure models and secondary structure elements prior to and after molecular dynamics simulations. (a) Predicted epitope peptide model structures (left) were compared to structure models after 200 ns simulation. Upper panel: peptide 1, lower panel: peptide 6. Amino acid residues of peptides are listed from top to bottom (center). The vertical line at the left indicates the epitope region. The secondary structure element into which each residue is involved in at a given simulation time point is depicted from left to right as color coded bar (40,000 bars per line). Color code: white: coil; yellow: turn; green: bend; blue: helical; purple: n-helix. (b) Positional flexibilities of backbone atoms of epitope peptides 1 (black trace) and 6 (orange trace). Root mean squared deviation (RMSD) as a function of simulation time.

**Table S1.** Numbering, amino acid sequences, SNP information, molecular masses, isoelectric points, numbers of atoms of human cardiac Troponin I peptides and number of ITEM-FOUR measurement repetitions.

| peptide no. | amino acid sequence <sup>a)</sup>        | base position <sup>b)</sup> | clin. var. ID <sup>c)</sup> | molecular mass | pI <sup>d)</sup> | number of atoms <sup>e)</sup> | ITEM-FOUR repetitions |
|-------------|------------------------------------------|-----------------------------|-----------------------------|----------------|------------------|-------------------------------|-----------------------|
| 1           | ENREVG <u>DWRKN</u> IDAL                 | n.a.                        | n.a.                        | 1813.91        | 4.6              | 251                           | 7                     |
| 2           | EN <b>Q</b> EVGDWRKNIDAL                 | 55,151,910                  | RCV000167988.8              | 1785.86        | 4.1              | 245                           | 5                     |
| 3           | ENREVG <u>DW</u> <b>H</b> KNIDAL         | 55,151,892                  | RCV000156328.2              | 1794.86        | 4.6              | 245                           | 2                     |
| 4           | ENREVG <u>DW</u> <b>L</b> KNIDAL         | 55,151,892                  | RCV000156328.2              | 1770.89        | 4.1              | 247                           | 5                     |
| 5           | ENREVG <u>DW</u> <b>C</b> KNIDAL         | 55,151,893                  | RCV000152072.3              | 1760.82        | 4.1              | 237                           | 5                     |
| 6           | ENREVG <b>G</b> WRKNIDAL                 | 55,151,898                  | RCV000013235.24             | 1755.90        | 7.1              | 245                           | 4                     |
| 7           | ENREVG <u>DW</u> <b>P</b> KNIDAL         | 55,151,892                  | RCV000156328.2              | 1754.86        | 4.1              | 242                           | 2                     |
| 8           | ENREVG <u>DW</u> <b>P</b> <b>E</b> NIDAL | 55,151,892                  | RCV000156328.2              | 1755.81        | 3.5              | 237                           | 2                     |
|             |                                          | 55,151,890                  | RCV001296186.2              |                |                  |                               |                       |

a) aa184-aa198 from Tn I (UniProt: P19429); the epitope region of the monoclonal anti-hcTroponin I antibody (clone MF4, ab38210 from abcam) is underlined; amino acid exchanges in peptides 2-8 are printed in bold and are colored

b) position on chromosome 19 (exon 8)

c) <https://www.ncbi.nlm.nih.gov/clinvar/>; n.a.: not applicable

d) calculated according to Skoog&Wichmann (reference no.)

e) calculated from amino acid composition

**Table S2.** Ion charge states, m/z values, and molecular masses for anti-hcTn I antibody and rituximab.

| z    | anti-hcTn I measurement 1 <sup>a)</sup> |          | anti-hcTn I measurement 2 <sup>a)</sup> |          | anti-hcTn I measurement 3 <sup>a)</sup> |          | rituximab measurement 1 <sup>a)</sup> |          | rituximab measurement 2 <sup>a)</sup> |          |
|------|-----------------------------------------|----------|-----------------------------------------|----------|-----------------------------------------|----------|---------------------------------------|----------|---------------------------------------|----------|
|      | m/z                                     | MM       | m/z                                     | MM       | m/z                                     | MM       | m/z                                   | MM       | m/z                                   | MM       |
| 29   | n.d.                                    | n.d.     | n.d.                                    | n.d.     | n.d.                                    | n.d.     | 5086.8                                | 147487.9 | 5085.7                                | 147455.4 |
| 28   | 5246.7                                  | 146879.6 | n.d.                                    | n.d.     | n.d.                                    | n.d.     | 5266.8                                | 147443.5 | 5266.2                                | 147425.9 |
| 27   | 5437.1                                  | 146775.5 | 5435.0                                  | 146716.7 | 5433.0                                  | 146664.5 | 5463.1                                | 147477.2 | 5460.6                                | 147410.0 |
| 26   | 5646.0                                  | 146770.0 | 5643.7                                  | 146710.5 | 5642.5                                  | 146679.0 | 5674.6                                | 147514.6 | 5670.6                                | 147410.4 |
| 25   | 5875.7                                  | 146867.5 | 5870.5                                  | 146736.5 | 5868.9                                  | 146697.3 | 5902.2                                | 147528.8 | 5898.0                                | 147425.5 |
| 24   | 6121.0                                  | 146880.5 | 6116.3                                  | 146767.4 | 6116.2                                  | 146763.6 | n.d.                                  | n.d.     | n.d.                                  | n.d.     |
| mean |                                         | 146834.6 |                                         | 146732.8 |                                         | 146701.1 |                                       | 147490.4 |                                       | 147425.4 |
| s.d. |                                         | 56.7     |                                         | 25.6     |                                         | 43.8     |                                       | 33.3     |                                       | 18.5     |

a) n.d.: not determined; MM: molecular mass; s.d.: standard deviation

**Table S3.** Ion species, charge states, m/z values and intensities for anti-Troponin I antibody complexed with Troponin I peptide 1 at measured collision cell voltage differences. <sup>a,b)</sup>

| peptide 1, measurement 1 |         |             |      |      |      |      |      |      |      |      |      |      |
|--------------------------|---------|-------------|------|------|------|------|------|------|------|------|------|------|
| ion / charge state       | m/z     | $\Delta CV$ |      |      |      |      |      |      |      |      |      |      |
|                          |         | 4           | 8    | 12   | 16   | 20   | 30   | 40   | 50   | 60   | 70   | 80   |
| peptide dimer / 1+       | 3628.90 | 5           | 10   | 10   | 10   | 10   | 10   | 10   | 10   | 10   | 10   | 10   |
| peptide 1 / 1+           | 1814.95 | 5           | 11   | 10   | 10   | 10   | 14   | 18   | 23   | 42   | 51   | 81   |
| peptide 1 / 2+           | 907.99  | 25          | 121  | 273  | 578  | 984  | 1988 | 3216 | 4454 | 6528 | 7557 | 7827 |
| peptide 1 / 3+           | 605.71  | 8           | 53   | 83   | 196  | 329  | 546  | 802  | 1130 | 1545 | 1633 | 1617 |
| peptide 1 / 4+           | 454.49  | 5           | 10   | 10   | 10   | 10   | 10   | 10   | 10   | 10   | 10   | 10   |
| antibody+0 pep / 28+     | 5234    | 50          | 50   | 50   | 50   | 50   | 50   | 50   | 50   | 50   | 50   | 50   |
| antibody+0 pep / 27+     | 5424    | 52          | 116  | 114  | 129  | 139  | 130  | 135  | 133  | 133  | 132  | 145  |
| antibody+0 pep / 26+     | 5634    | 367         | 812  | 848  | 961  | 1061 | 995  | 1054 | 1071 | 1078 | 1132 | 1185 |
| antibody+0 pep / 25+     | 5861    | 1134        | 2488 | 2514 | 2969 | 3160 | 3056 | 3251 | 3412 | 3572 | 3568 | 3720 |
| antibody+0 pep / 24+     | 6105    | 1546        | 3549 | 3705 | 4175 | 4409 | 4365 | 4887 | 4951 | 5273 | 5186 | 5144 |
| antibody+0 pep / 23+     | 6374    | 1113        | 2496 | 2728 | 2996 | 3079 | 3140 | 3627 | 3655 | 3985 | 4063 | 4070 |
| antibody+0 pep / 22+     | 6671    | 434         | 1001 | 1105 | 1164 | 1168 | 1256 | 1433 | 1554 | 1747 | 1791 | 1779 |
| antibody+0 pep / 21+     | 6979    | 50          | 50   | 50   | 50   | 50   | 50   | 50   | 50   | 50   | 50   | 50   |
| antibody+1 pep/ 28+      | 5300    | 50          | 50   | 50   | 50   | 50   | 50   | 50   | 50   | 50   | 50   | 50   |
| antibody+1 pep/ 27+      | 5493    | 107         | 218  | 230  | 264  | 274  | 246  | 249  | 247  | 254  | 237  | 255  |
| antibody+1 pep/ 26+      | 5702    | 628         | 1385 | 1373 | 1620 | 1685 | 1577 | 1613 | 1645 | 1629 | 1621 | 1674 |
| antibody+1 pep/ 25+      | 5935    | 1500        | 3230 | 3258 | 3787 | 3981 | 3803 | 4011 | 4056 | 4143 | 4111 | 4111 |
| antibody+1 pep/ 24+      | 6182    | 1726        | 3841 | 4066 | 4527 | 4615 | 4549 | 4917 | 4912 | 5233 | 5031 | 5012 |
| antibody+1 pep/ 23+      | 6454    | 1002        | 2193 | 2443 | 2581 | 2612 | 2694 | 2922 | 3106 | 3146 | 3159 | 3169 |
| antibody+1 pep/ 22+      | 6754    | 345         | 759  | 871  | 863  | 896  | 915  | 1021 | 1092 | 1157 | 1212 | 1203 |
| antibody+1 pep/ 21+      | 7066    | 50          | 50   | 50   | 50   | 50   | 50   | 50   | 50   | 50   | 50   | 50   |
| antibody+2 peps/ 28+     | 5364    | 50          | 50   | 50   | 50   | 50   | 50   | 50   | 50   | 50   | 50   | 50   |
| antibody+2 peps/ 27+     | 5555    | 64          | 134  | 138  | 149  | 151  | 139  | 131  | 135  | 137  | 125  | 132  |
| antibody+2 peps/ 26+     | 5771    | 249         | 537  | 529  | 594  | 619  | 592  | 573  | 609  | 577  | 518  | 556  |
| antibody+2 peps/ 25+     | 6007    | 485         | 1044 | 1079 | 1240 | 1236 | 1191 | 1237 | 1208 | 1186 | 1118 | 1133 |
| antibody+2 peps/ 24+     | 6261    | 493         | 1082 | 1145 | 1237 | 1273 | 1209 | 1305 | 1277 | 1258 | 1241 | 1189 |
| antibody+2 peps/ 23+     | 6532    | 229         | 492  | 580  | 587  | 592  | 584  | 627  | 620  | 618  | 622  | 585  |
| antibody+2 peps/ 22+     | 6834    | 61          | 151  | 174  | 176  | 185  | 196  | 199  | 208  | 213  | 210  | 216  |
| antibody+2 peps/ 21+     | 7151    | 50          | 50   | 50   | 50   | 50   | 50   | 50   | 50   | 50   | 50   | 50   |

|                   |      |      |      |      |      |      |      |      |      |      |      |      |
|-------------------|------|------|------|------|------|------|------|------|------|------|------|------|
| antibody fragment | 1000 | n.d. | 20   | 20   | 20   | 20   |
| antibody fragment | 1200 | n.d. | 20   | 20   | 20   | 20   |
| antibody fragment | 1324 | n.d. | n.d. | n.d. | n.d. | n.d. | n.d. | 20   | n.d. | n.d. | n.d. | n.d. |
| antibody fragment | 1471 | n.d. | n.d. | n.d. | n.d. | n.d. | n.d. | 20   | n.d. | 48   | 151  | 407  |
| antibody fragment | 1554 | n.d. | n.d. | n.d. | n.d. | n.d. | n.d. | 37   | 46   | 63   | n.d. | n.d. |
| antibody fragment | 1655 | n.d. | 92   | 363  | 852  |
| antibody fragment | 1748 | n.d. | n.d. | n.d. | n.d. | n.d. | n.d. | 88   | 116  | 170  | n.d. | n.d. |
| antibody fragment | 1851 | n.d. |
| antibody fragment | 1891 | n.d. |
| antibody fragment | 1998 | n.d. | n.d. | n.d. | n.d. | n.d. | n.d. | 72   | 139  | 253  | 266  | 474  |
| antibody fragment | 2006 | n.d. |
| antibody fragment | 2160 | n.d. | n.d. | n.d. | n.d. | n.d. | n.d. | 20   | n.d. | n.d. | n.d. | n.d. |
| antibody fragment | 2174 | n.d. | n.d. | n.d. | n.d. | n.d. | n.d. | 20   | n.d. | n.d. | n.d. | n.d. |
| antibody fragment | 2189 | n.d. |
| antibody fragment | 2207 | n.d. |
| antibody fragment | 2331 | n.d. | 46   | 93   | 106  | 185  |
| antibody fragment | 2392 | n.d. |
| antibody fragment | 2508 | n.d. | 20   | 20   | 20   | 20   |
| antibody fragment | 2591 | n.d. | 20   | 20   | 20   | 20   |

a) Imputed values necessary for optimized Gauss-fit are shown in red and are equal to the background intensity at

the given m/z.

b) n.d.: value not determined / ion signal not present.

Table S3. continued

peptide 1, measurement 2

| ion / charge state   | m/z     | $\Delta CV$ |      |      |      |      |      |      |      |      |      |      |      |      |
|----------------------|---------|-------------|------|------|------|------|------|------|------|------|------|------|------|------|
|                      |         | 2           | 4    | 6    | 8    | 12   | 16   | 20   | 30   | 40   | 50   | 60   | 70   | 80   |
| peptide dimer / 1+   | 3628.90 | 10          | 10   | 10   | 10   | 10   | 10   | 10   | 10   | 10   | 10   | 10   | 10   | 10   |
| peptide 1 / 1+       | 1814.95 | 10          | 10   | 10   | 20   | 10   | 10   | 9    | 18   | 37   | 44   | 70   | 98   | 104  |
| peptide 1 / 2+       | 907.99  | 105         | 164  | 281  | 416  | 823  | 1269 | 1708 | 2840 | 5622 | 7735 | 8646 | 8983 | 8831 |
| peptide 1 / 3+       | 605.71  | 32          | 72   | 93   | 139  | 274  | 403  | 527  | 834  | 1456 | 1920 | 1974 | 1923 | 1767 |
| peptide 1 / 4+       | 454.49  | 10          | 10   | 10   | 10   | 10   | 10   | 10   | 10   | 10   | 10   | 10   | 10   | 10   |
| antibody+0 pep / 29+ | 5049    | 50          | 50   | 50   | 50   | 50   | 50   | 50   | 50   | 50   | 50   | 50   | 50   | 50   |
| antibody+0 pep / 28+ | 5228    | 712         | 757  | 1275 | 1481 | 1476 | 1642 | 1507 | 1004 | 1397 | 978  | 776  | 686  | 617  |
| antibody+0 pep / 27+ | 5421    | 2428        | 2586 | 4148 | 4700 | 4850 | 5241 | 5162 | 3902 | 4774 | 4010 | 3402 | 3233 | 2966 |
| antibody+0 pep / 26+ | 5631    | 4545        | 4632 | 6592 | 7214 | 7318 | 8247 | 8141 | 7229 | 8230 | 7717 | 7142 | 6719 | 6329 |
| antibody+0 pep / 25+ | 5857    | 4113        | 4363 | 4767 | 5083 | 5217 | 5710 | 5927 | 6039 | 6557 | 6921 | 6909 | 6590 | 6453 |
| antibody+0 pep / 24+ | 6101    | 2273        | 2459 | 2002 | 2072 | 2116 | 2238 | 2447 | 2827 | 3110 | 3607 | 3897 | 3868 | 3752 |
| antibody+0 pep / 23+ | 6366    | 822         | 907  | 568  | 539  | 517  | 555  | 637  | 824  | 978  | 1299 | 1453 | 1479 | 1502 |
| antibody+0 pep / 22+ | 6655    | 50          | 50   | 50   | 50   | 50   | 50   | 50   | 50   | 50   | 50   | 50   | 50   | 50   |
| antibody+1 pep / 29+ | 5111    | 50          | 50   | 50   | 50   | 50   | 50   | 50   | 50   | 50   | 50   | 50   | 50   | 50   |
| antibody+1 pep / 28+ | 5296    | 1334        | 1355 | 2283 | 2624 | 2570 | 2847 | 2590 | 1786 | 2166 | 1502 | 1209 | 1080 | 1027 |
| antibody+1 pep / 27+ | 5488    | 4020        | 4056 | 6240 | 6899 | 7042 | 7619 | 7386 | 5842 | 6596 | 5537 | 4845 | 4499 | 4180 |
| antibody+1 pep / 26+ | 5702    | 6064        | 6285 | 8246 | 8909 | 8867 | 9701 | 9631 | 8948 | 9331 | 9095 | 8585 | 7920 | 7471 |
| antibody+1 pep / 25+ | 5930    | 4471        | 4683 | 4967 | 5135 | 5278 | 5686 | 5789 | 6031 | 6262 | 6772 | 6805 | 6426 | 6181 |
| antibody+1 pep / 24+ | 6176    | 2073        | 2196 | 1826 | 1807 | 1944 | 1956 | 2044 | 2464 | 2607 | 2973 | 3316 | 3149 | 3045 |
| antibody+1 pep / 23+ | 6443    | 601         | 652  | 425  | 389  | 394  | 410  | 449  | 574  | 657  | 846  | 1013 | 1029 | 1035 |
| antibody+1 pep / 22+ | 6737    | 50          | 50   | 50   | 50   | 50   | 50   | 50   | 50   | 50   | 50   | 50   | 50   | 50   |
| antibody+2 pep / 29+ | 5173    | 50          | 50   | 50   | 50   | 50   | 50   | 50   | 50   | 50   | 50   | 50   | 50   | 50   |
| antibody+2 pep / 28+ | 5356    | 810         | 868  | 1146 | 1232 | 1235 | 1230 | 1115 | 758  | 849  | 580  | 483  | 440  | 382  |
| antibody+2 pep / 27+ | 5556    | 2439        | 2615 | 2989 | 3050 | 3072 | 2843 | 2658 | 2156 | 2251 | 1966 | 1643 | 1502 | 1443 |
| antibody+2 pep / 26+ | 5771    | 3590        | 3788 | 3754 | 3541 | 3563 | 3057 | 3022 | 2789 | 2883 | 2657 | 2534 | 2261 | 2139 |
| antibody+2 pep / 25+ | 6000    | 2587        | 2796 | 2251 | 2064 | 2048 | 1711 | 1595 | 1620 | 1618 | 1671 | 1610 | 1488 | 1464 |
| antibody+2 pep / 24+ | 6251    | 1171        | 1288 | 823  | 681  | 655  | 520  | 525  | 566  | 564  | 652  | 637  | 613  | 608  |
| antibody+2 pep / 23+ | 6519    | 343         | 375  | 202  | 145  | 149  | 108  | 108  | 141  | 146  | 188  | 180  | 182  | 195  |
| antibody+2 pep / 22+ | 6819    | 50          | 50   | 50   | 50   | 50   | 50   | 50   | 50   | 50   | 50   | 50   | 50   | 50   |

|                   |      |      |      |      |      |      |      |      |      |      |      |      |      |      |
|-------------------|------|------|------|------|------|------|------|------|------|------|------|------|------|------|
| antibody fragment | 1200 | n.d. | 20   | 20   | 20   |
| antibody fragment | 1324 | n.d. | 20   | 20   | 20   | 29   | 64   | 153  |
| antibody fragment | 1471 | n.d. | 20   | 20   | 20   | 52   | 195  | 457  |
| antibody fragment | 1554 | n.d. | 32   | 43   | 69   | 96   | n.d. | n.d. |
| antibody fragment | 1655 | n.d. | 242  | 538  |
| antibody fragment | 1751 | n.d. | 38   | 80   | 110  | 171  | n.d. | n.d. |
| antibody fragment | 1851 | n.d. | 181  |
| antibody fragment | 1891 | n.d. | 214  |
| antibody fragment | 1998 | n.d. | 24   | 53   | 99   | 158  | 228  | 20   |
| antibody fragment | 2006 | n.d. | 206  | 235  |
| antibody fragment | 2160 | n.d. | 20   |
| antibody fragment | 2189 | n.d. | 20   | 20   | 133  |
| antibody fragment | 2207 | n.d. | 20   | 20   | n.d. |
| antibody fragment | 2331 | n.d. | 41   | n.d. | n.d. | 141  |
| antibody fragment | 2508 | 20   | 20   | 20   | 20   | 20   | 20   | 20   | 20   | 20   | 40   | 85   | 150  | 179  |
| antibody fragment | 2819 | 20   | 20   | 20   | 20   | 20   | 20   | 21   | 20   | 20   | 20   | n.d. | n.d. | 124  |
| antibody fragment | 3336 | 140  | 159  | 147  | 144  | 151  | 155  | 162  | 185  | 180  | 172  | 144  | 128  | 125  |
| antibody fragment | 3461 | 151  | 176  | 135  | 136  | 130  | 133  | 136  | 152  | 144  | 143  | 129  | n.d. | 20   |
| antibody fragment | 3590 | 166  | 166  | 168  | 163  | 171  | 173  | 175  | 171  | 165  | 167  | 176  | 181  | 144  |
| antibody fragment | 3728 | 126  | 135  | 90   | 99   | 91   | 85   | 78   | 74   | 80   | 56   | 65   | n.d. | n.d. |
| antibody fragment | 3886 | 123  | 132  | 84   | 78   | 73   | 64   | 68   | 51   | 62   | 53   | 58   | 59   | 68   |
| antibody fragment | 4000 | 20   | 20   | 20   | 20   | 20   | 20   | 20   | 20   | 20   | 20   | 20   | 20   | 20   |
| antibody fragment | 4100 | 20   | 20   | 20   | 20   | 20   | 20   | 20   | 20   | 20   | 20   | 20   | 20   | 20   |

a) Imputed values necessary for optimized Gauss-fit are shown in red and are equal to the background intensity at the given m/z.

b) n.d.: value not determined / ion signal not present.



Table S3. continued

peptide 1, measurement 3

| ion / charge state   | m/z     | $\Delta CV$ |      |      |      |      |      |      |      |      |      |       |       |       |
|----------------------|---------|-------------|------|------|------|------|------|------|------|------|------|-------|-------|-------|
|                      |         | 2           | 4    | 6    | 8    | 12   | 16   | 20   | 30   | 40   | 50   | 60    | 70    | 80    |
| peptide dimer / 1+   | 3628.90 | 10          | 10   | 10   | 10   | 10   | 10   | 10   | 10   | 10   | 10   | 10    | 10    | 10    |
| peptide 1 / 1+       | 1814.90 | 6           | 8    | 7    | 7    | 12   | 11   | 12   | 26   | 45   | 63   | 111   | 133   | 152   |
| peptide 1 / 2+       | 907.99  | 118         | 187  | 256  | 352  | 692  | 1634 | 2155 | 4871 | 6635 | 9454 | 11135 | 10995 | 11326 |
| peptide 1 / 3+       | 605.73  | 59          | 76   | 126  | 134  | 238  | 513  | 692  | 1254 | 1788 | 2324 | 2294  | 2234  | 2118  |
| peptide 1 / 4+       | 454.49  | 10          | 10   | 10   | 10   | 10   | 10   | 10   | 10   | 10   | 10   | 10    | 10    | 10    |
| antibody+0 pep / 29+ | 5049    | 50          | 50   | 50   | 50   | 50   | 50   | 50   | 50   | 50   | 50   | 50    | 50    | 50    |
| antibody+0 pep / 28+ | 5231    | 506         | 582  | 542  | 400  | 330  | 773  | 652  | 643  | 588  | 587  | 581   | 513   | 507   |
| antibody+0 pep / 27+ | 5424    | 1963        | 2302 | 2188 | 1773 | 1616 | 2834 | 2646 | 2631 | 2519 | 2622 | 2564  | 2315  | 2218  |
| antibody+0 pep / 26+ | 5632    | 3689        | 4083 | 4114 | 3696 | 3484 | 5073 | 4974 | 5110 | 5317 | 5485 | 5376  | 5124  | 5021  |
| antibody+0 pep / 25+ | 5860    | 2851        | 3293 | 3291 | 3274 | 3274 | 3893 | 3959 | 4544 | 4877 | 5184 | 5348  | 4993  | 5039  |
| antibody+0 pep / 24+ | 6102    | 1315        | 1404 | 1517 | 1659 | 1685 | 1712 | 1835 | 2330 | 2667 | 2971 | 3142  | 3031  | 3131  |
| antibody+0 pep / 23+ | 6365    | 381         | 363  | 404  | 494  | 551  | 496  | 582  | 811  | 1124 | 1175 | 1339  | 1303  | 1359  |
| antibody+0 pep / 22+ | 6655    | 50          | 50   | 50   | 50   | 50   | 50   | 50   | 50   | 50   | 50   | 50    | 50    | 50    |
| antibody+1 pep / 29+ | 5111    | 50          | 50   | 50   | 50   | 50   | 50   | 50   | 50   | 50   | 50   | 50    | 50    | 50    |
| antibody+1 pep / 28+ | 5296    | 1185        | 1512 | 1400 | 1025 | 872  | 1888 | 1667 | 1564 | 1413 | 1381 | 1295  | 1102  | 1024  |
| antibody+1 pep / 27+ | 5489    | 4192        | 4916 | 4812 | 4034 | 3773 | 6061 | 5581 | 5683 | 5456 | 5356 | 5065  | 4633  | 4530  |
| antibody+1 pep / 26+ | 5701    | 6474        | 7368 | 7391 | 7017 | 6850 | 8697 | 8623 | 9133 | 9295 | 9384 | 9198  | 8567  | 8360  |
| antibody+1 pep / 25+ | 5930    | 4458        | 4767 | 5074 | 5132 | 5196 | 5764 | 5828 | 6548 | 7029 | 7181 | 7353  | 6989  | 7002  |
| antibody+1 pep / 24+ | 6179    | 1770        | 1816 | 2020 | 2231 | 2283 | 2206 | 2417 | 3059 | 3366 | 3591 | 3768  | 3550  | 3697  |
| antibody+1 pep / 23+ | 6446    | 388         | 419  | 445  | 524  | 597  | 533  | 608  | 859  | 1062 | 1168 | 1314  | 1270  | 1312  |
| antibody+1 pep / 22+ | 6737    | 50          | 50   | 50   | 50   | 50   | 50   | 50   | 50   | 50   | 50   | 50    | 50    | 50    |
| antibody+2 pep / 29+ | 5173    | 50          | 50   | 50   | 50   | 50   | 50   | 50   | 50   | 50   | 50   | 50    | 50    | 50    |
| antibody+2 pep / 28+ | 5359    | 726         | 901  | 842  | 632  | 528  | 1128 | 1022 | 968  | 789  | 741  | 669   | 603   | 533   |
| antibody+2 pep / 27+ | 5558    | 2275        | 2588 | 2607 | 2238 | 2072 | 3214 | 2949 | 2894 | 2716 | 2540 | 2413  | 2204  | 2107  |
| antibody+2 pep / 26+ | 5773    | 3056        | 3320 | 3392 | 3349 | 3322 | 3993 | 3846 | 3911 | 4042 | 3822 | 3681  | 3425  | 3421  |
| antibody+2 pep / 25+ | 6003    | 1805        | 1916 | 2045 | 2150 | 2104 | 2302 | 2259 | 2484 | 2581 | 2505 | 2486  | 2306  | 2307  |
| antibody+2 pep / 24+ | 6250    | 618         | 638  | 688  | 753  | 822  | 748  | 800  | 892  | 1021 | 957  | 1020  | 905   | 967   |
| antibody+2 pep / 23+ | 6523    | 121         | 129  | 150  | 156  | 167  | 156  | 171  | 195  | 239  | 254  | 271   | 262   | 286   |
| antibody+2 pep / 22+ | 6819    | 50          | 50   | 50   | 50   | 50   | 50   | 50   | 50   | 50   | 50   | 50    | 50    | 50    |

|                   |      |      |      |      |      |      |      |      |      |      |      |      |      |      |
|-------------------|------|------|------|------|------|------|------|------|------|------|------|------|------|------|
| antibody fragment | 1000 | n.d. | 20   | 20   | 20   | 20   | 20   | 20   |
| antibody fragment | 1200 | n.d. | 20   | 20   | 20   | 20   | 20   | 20   |
| antibody fragment | 1324 | n.d. | 25   | 63   | 125  |
| antibody fragment | 1471 | n.d. | 77   | 182  | 508  |
| antibody fragment | 1554 | n.d. | 46   | 52   | 64   | n.d. | n.d. | n.d. |
| antibody fragment | 1655 | n.d. | 255  | 576  |
| antibody fragment | 1751 | n.d. | 46   | 75   | 124  | 180  | n.d. | n.d. |
| antibody fragment | 1851 | n.d. | 214  |
| antibody fragment | 1892 | n.d. | 256  |
| antibody fragment | 1998 | n.d. | 54   | 127  | 170  | 227  | 294  |
| antibody fragment | 2006 | n.d. | 20   |
| antibody fragment | 2160 | n.d. | 20   | 20   |
| antibody fragment | 2189 | n.d. | 20   | 20   | 20   | 138  |
| antibody fragment | 2207 | n.d. | 20   | 20   | 20   | n.d. |
| antibody fragment | 2331 | n.d. | 59   | 20   | n.d. | n.d. |
| antibody fragment | 2508 | 20   | 20   | 20   | 20   | 20   | 20   | 20   | 20   | 20   | n.d. | 97   | n.d. | 240  |
| antibody fragment | 2819 | 20   | 20   | 20   | 20   | 20   | 20   | 20   | 20   | 20   | n.d. | n.d. | n.d. | 159  |
| antibody fragment | 3336 | 150  | 139  | 168  | 166  | 189  | 149  | 193  | 193  | 185  | 184  | 157  | n.d. | n.d. |
| antibody fragment | 3461 | 168  | 176  | 213  | 219  | 218  | 217  | 216  | 235  | 253  | 237  | 205  | n.d. | n.d. |
| antibody fragment | 3590 | 175  | 169  | 190  | 185  | 213  | 221  | 202  | 232  | 224  | 240  | 265  | 225  | n.d. |
| antibody fragment | 3728 | 108  | 117  | 129  | 108  | 110  | 145  | 155  | 138  | 132  | 140  | 131  | 113  | n.d. |
| antibody fragment | 3886 | 62   | 64   | 57   | 65   | 60   | 77   | 80   | 99   | 83   | 91   | 97   | 88   | n.d. |
| antibody fragment | 4000 | 20   | 20   | 20   | 20   | 20   | 20   | 20   | 20   | 20   | 20   | 20   | 20   | 20   |
| antibody fragment | 4100 | 20   | 20   | 20   | 20   | 20   | 20   | 20   | 20   | 20   | 20   | 20   | 20   | 20   |

a) Imputed values necessary for optimized Gauss-fit are shown in red and are equal to the background intensity at the given m/z.

b) n.d.: value not determined / ion signal not present.

Table S3. continued

peptide 1, measurement 4

| ion / charge state   | m/z     | $\Delta CV$ |      |      |      |      |      |      |      |      |      |       |       |       |
|----------------------|---------|-------------|------|------|------|------|------|------|------|------|------|-------|-------|-------|
|                      |         | 2           | 4    | 6    | 8    | 12   | 16   | 20   | 30   | 40   | 50   | 60    | 70    | 80    |
| peptide dimer / 1+   | 3628.90 | 10          | 10   | 10   | 10   | 10   | 10   | 10   | 10   | 10   | 10   | 10    | 10    | 10    |
| peptide 1 / 1+       | 1814.90 | 5           | 5    | 8    | 8    | 7    | 16   | 8    | 18   | 29   | 58   | 94    | 135   | 156   |
| peptide 1 / 2+       | 907.99  | 75          | 111  | 193  | 328  | 465  | 1052 | 1709 | 3463 | 6093 | 7789 | 10328 | 10711 | 10635 |
| peptide 1 / 3+       | 605.73  | 31          | 52   | 91   | 121  | 153  | 289  | 448  | 799  | 1373 | 1513 | 1621  | 1573  | 1376  |
| peptide 1 / 4+       | 454.49  | 10          | 10   | 10   | 10   | 10   | 10   | 10   | 10   | 10   | 10   | 10    | 10    | 10    |
| antibody+0 pep / 29+ | 5049    | 50          | 50   | 50   | 50   | 50   | 50   | 50   | 50   | 50   | 50   | 50    | 50    | 50    |
| antibody+0 pep / 28+ | 5244    | 278         | 252  | 294  | 367  | 276  | 377  | 469  | 542  | 636  | 434  | 530   | 522   | 484   |
| antibody+0 pep / 27+ | 5434    | 1222        | 991  | 1211 | 1536 | 897  | 1356 | 1608 | 1870 | 2164 | 1790 | 2002  | 1957  | 1785  |
| antibody+0 pep / 26+ | 5642    | 2507        | 2038 | 2481 | 3083 | 1928 | 2504 | 3042 | 3327 | 3720 | 3465 | 3906  | 3782  | 3400  |
| antibody+0 pep / 25+ | 5866    | 2259        | 1846 | 2289 | 2727 | 2017 | 2299 | 2567 | 2826 | 3119 | 3222 | 3550  | 3472  | 3149  |
| antibody+0 pep / 24+ | 6111    | 1122        | 920  | 1119 | 1337 | 1242 | 1267 | 1352 | 1441 | 1603 | 1783 | 2020  | 2024  | 1860  |
| antibody+0 pep / 23+ | 6383    | 308         | 262  | 349  | 422  | 418  | 432  | 434  | 526  | 590  | 732  | 812   | 840   | 759   |
| antibody+0 pep / 22+ | 6655    | 50          | 50   | 50   | 50   | 50   | 50   | 50   | 50   | 50   | 50   | 50    | 50    | 50    |
| antibody+1 pep / 29+ | 5111    | 50          | 50   | 50   | 50   | 50   | 50   | 50   | 50   | 50   | 50   | 50    | 50    | 50    |
| antibody+1 pep / 28+ | 5304    | 674         | 604  | 738  | 894  | 627  | 928  | 1165 | 1327 | 1550 | 1082 | 1212  | 1146  | 1018  |
| antibody+1 pep / 27+ | 5501    | 2872        | 2334 | 2804 | 3500 | 1953 | 2980 | 3499 | 4040 | 4434 | 3693 | 3900  | 3787  | 3376  |
| antibody+1 pep / 26+ | 5712    | 5092        | 3991 | 4896 | 6006 | 3268 | 4375 | 5216 | 5795 | 6203 | 5923 | 6374  | 6107  | 5356  |
| antibody+1 pep / 25+ | 5939    | 3733        | 2981 | 3640 | 4547 | 2533 | 3097 | 3505 | 3807 | 4196 | 4523 | 4931  | 4606  | 4209  |
| antibody+1 pep / 24+ | 6186    | 1559        | 1242 | 1547 | 1936 | 1205 | 1331 | 1496 | 1640 | 1857 | 2175 | 2405  | 2299  | 2129  |
| antibody+1 pep / 23+ | 6451    | 364         | 310  | 400  | 471  | 341  | 382  | 410  | 492  | 566  | 710  | 807   | 790   | 754   |
| antibody+1 pep / 22+ | 6737    | 50          | 50   | 50   | 50   | 50   | 50   | 50   | 50   | 50   | 50   | 50    | 50    | 50    |
| antibody+2 pep / 29+ | 5173    | 50          | 50   | 50   | 50   | 50   | 50   | 50   | 50   | 50   | 50   | 50    | 50    | 50    |
| antibody+2 pep / 28+ | 5368    | 422         | 445  | 518  | 578  | 559  | 736  | 878  | 934  | 956  | 689  | 671   | 707   | 581   |
| antibody+2 pep / 27+ | 5567    | 1615        | 1565 | 1749 | 2001 | 1904 | 2238 | 2529 | 2630 | 2578 | 2074 | 2017  | 1906  | 1759  |
| antibody+2 pep / 26+ | 5781    | 2469        | 2316 | 2578 | 3025 | 2951 | 3135 | 3353 | 3329 | 3259 | 2959 | 2859  | 2693  | 2570  |
| antibody+2 pep / 25+ | 6006    | 1531        | 1501 | 1647 | 2011 | 2124 | 2114 | 2171 | 2136 | 2102 | 2029 | 1990  | 1825  | 1828  |
| antibody+2 pep / 24+ | 6256    | 545         | 508  | 615  | 729  | 857  | 810  | 853  | 808  | 807  | 903  | 867   | 789   | 848   |
| antibody+2 pep / 23+ | 6523    | 112         | 114  | 128  | 143  | 191  | 189  | 193  | 196  | 235  | 256  | 263   | 268   | 304   |
| antibody+2 pep / 22+ | 6819    | 50          | 50   | 50   | 50   | 50   | 50   | 50   | 50   | 50   | 50   | 50    | 50    | 50    |

|                   |      |      |      |      |      |      |      |      |      |      |      |      |      |      |
|-------------------|------|------|------|------|------|------|------|------|------|------|------|------|------|------|
| antibody fragment | 1000 | n.d. | 20   | 20   | 20   | 20   | 20   |
| antibody fragment | 1200 | n.d. | 20   | 20   | 20   | 20   | 20   |
| antibody fragment | 1324 | n.d. | 20   | 20   | n.d. | n.d. | 62   |
| antibody fragment | 1471 | n.d. | 56   | 90   | 205  |
| antibody fragment | 1554 | n.d. | 37   | 41   | 85   | n.d. | n.d. |
| antibody fragment | 1655 | n.d. | 244  |
| antibody fragment | 1751 | n.d. | 56   | 77   | 110  | 139  | n.d. |
| antibody fragment | 1892 | n.d. | 139  |
| antibody fragment | 2006 | n.d. | 42   | 68   | 102  | 145  | n.d. |
| antibody fragment | 2160 | n.d. | 20   |
| antibody fragment | 2189 | n.d. | 20   |
| antibody fragment | 2207 | n.d. | 20   | 20   | 20   |
| antibody fragment | 2331 | 20   | 20   | 20   | 20   | 20   | 20   | 20   | 20   | 20   | 20   | 20   | 20   | 20   |
| antibody fragment | 2508 | 20   | 20   | 20   | 20   | 20   | 20   | 20   | 20   | 20   | 20   | n.d. | n.d. | n.d. |
| antibody fragment | 2819 | 20   | 20   | 20   | 20   | 20   | 20   | 20   | 20   | 20   | 20   | n.d. | n.d. | n.d. |
| antibody fragment | 3336 | 147  | 136  | 135  | 166  | 89   | 121  | 132  | 147  | 135  | 115  | 120  | 94   | 89   |
| antibody fragment | 3461 | 168  | 139  | 172  | 194  | 116  | 146  | 164  | 178  | 177  | 162  | 165  | 133  | n.d. |
| antibody fragment | 3590 | 145  | 131  | 150  | 159  | 121  | 141  | 156  | 168  | 166  | 192  | 187  | 174  | 144  |
| antibody fragment | 3728 | 88   | 83   | 100  | 96   | 108  | 116  | 125  | 121  | 125  | 125  | 130  | 144  | 122  |
| antibody fragment | 3886 | 68   | 49   | 53   | 64   | 78   | 99   | 91   | 88   | 90   | 95   | 100  | 97   | n.d. |
| antibody fragment | 4000 | 20   | 20   | 20   | 20   | 20   | 20   | 20   | 20   | 20   | 20   | 20   | 20   | 20   |
| antibody fragment | 4300 | 20   | 20   | 20   | 20   | 20   | 20   | 20   | 20   | 20   | 20   | 20   | 20   | 20   |

a) Imputed values necessary for optimized Gauss-fit are shown in red and are equal to the background intensity at the given m/z.

b) n.d.: value not determined / ion signal not present.

Table S3. continued

peptide 1, measurement 5

| ion / charge state   | m/z     | $\Delta$ CV |      |       |       |       |       |       |       |       |       |       |       |       |
|----------------------|---------|-------------|------|-------|-------|-------|-------|-------|-------|-------|-------|-------|-------|-------|
|                      |         | 2           | 4    | 6     | 8     | 12    | 16    | 20    | 30    | 40    | 50    | 60    | 70    | 80    |
| peptide dimer / 1+   | 3628.90 | 10          | 10   | 10    | 10    | 10    | 10    | 10    | 10    | 10    | 10    | 10    | 10    | 10    |
| peptide 1 / 1+       | 1814.95 | 9           | 12   | 16    | 20    | 20    | 21    | 23    | 70    | 107   | 166   | 285   | 448   | 562   |
| peptide 1 / 2+       | 907.99  | 65          | 84   | 332   | 582   | 1324  | 2277  | 3856  | 7493  | 13930 | 23362 | 31831 | 35399 | 36484 |
| peptide 1 / 3+       | 605.71  | 38          | 95   | 147   | 198   | 414   | 798   | 1118  | 1871  | 3557  | 5533  | 6536  | 6951  | 6554  |
| peptide 1 / 4+       | 454.49  | 10          | 10   | 10    | 10    | 10    | 10    | 10    | 10    | 10    | 10    | 10    | 10    | 10    |
| antibody+0 pep / 28+ | 5244    | 50          | 50   | 50    | 50    | 50    | 50    | 50    | 50    | 50    | 50    | 50    | 50    | 50    |
| antibody+0 pep / 27+ | 5421    | 167         | 228  | 376   | 808   | 978   | 869   | 1073  | 941   | 1014  | 983   | 1062  | 1207  | 1113  |
| antibody+0 pep / 26+ | 5631    | 853         | 1600 | 2521  | 4477  | 5006  | 4619  | 5327  | 5011  | 5530  | 5457  | 5696  | 6061  | 5847  |
| antibody+0 pep / 25+ | 5857    | 1944        | 4170 | 6678  | 10015 | 11048 | 10343 | 11170 | 11011 | 12011 | 12296 | 12995 | 13408 | 13027 |
| antibody+0 pep / 24+ | 6101    | 2017        | 4909 | 7992  | 10818 | 11877 | 11507 | 11870 | 11815 | 12787 | 13407 | 14537 | 14740 | 14163 |
| antibody+0 pep / 23+ | 6366    | 1138        | 2841 | 4589  | 6159  | 6614  | 6565  | 6562  | 6950  | 7608  | 8090  | 9231  | 9269  | 9195  |
| antibody+0 pep / 22+ | 6654    | 365         | 881  | 1404  | 1952  | 2035  | 2050  | 2042  | 2206  | 2486  | 3031  | 3517  | 3692  | 3761  |
| antibody+0 pep / 21+ | 6971    | 50          | 50   | 50    | 50    | 50    | 50    | 50    | 50    | 50    | 50    | 50    | 50    | 50    |
| antibody+1 pep/ 28+  | 5304    | 50          | 50   | 50    | 50    | 50    | 50    | 50    | 50    | 50    | 50    | 50    | 50    | 50    |
| antibody+1 pep/ 27+  | 5488    | 480         | 785  | 1260  | 2543  | 2962  | 2658  | 3045  | 2805  | 2969  | 2824  | 2918  | 3092  | 2922  |
| antibody+1 pep/ 26+  | 5702    | 2165        | 4403 | 7128  | 11261 | 12712 | 11659 | 12844 | 11965 | 13014 | 12669 | 12623 | 13011 | 12651 |
| antibody+1 pep/ 25+  | 5930    | 3950        | 9233 | 14563 | 20205 | 22282 | 21015 | 22603 | 21946 | 22949 | 22984 | 23441 | 23247 | 22606 |
| antibody+1 pep/ 24+  | 6176    | 3709        | 8972 | 14202 | 18526 | 19863 | 19474 | 19720 | 19958 | 20560 | 20967 | 21959 | 21510 | 21181 |
| antibody+1 pep/ 23+  | 6443    | 1671        | 4151 | 6699  | 8619  | 9291  | 9179  | 8928  | 9307  | 9883  | 10566 | 11225 | 11140 | 10829 |
| antibody+1 pep/ 22+  | 6735    | 469         | 1122 | 1818  | 2423  | 2531  | 2522  | 2437  | 2547  | 2738  | 3226  | 3734  | 3816  | 3735  |
| antibody+1 pep/ 21+  | 7057    | 50          | 50   | 50    | 50    | 50    | 50    | 50    | 50    | 50    | 50    | 50    | 50    | 50    |
| antibody+2 peps/ 28+ | 5368    | 50          | 50   | 50    | 50    | 50    | 50    | 50    | 50    | 50    | 50    | 50    | 50    | 50    |
| antibody+2 peps/ 27+ | 5556    | 337         | 620  | 1052  | 1845  | 2064  | 1924  | 2130  | 1891  | 2053  | 1819  | 1804  | 1873  | 1803  |
| antibody+2 peps/ 26+ | 5771    | 1311        | 3055 | 4735  | 6737  | 7430  | 6773  | 7498  | 6910  | 7281  | 6639  | 6484  | 6511  | 6102  |
| antibody+2 peps/ 25+ | 6000    | 2125        | 5282 | 8138  | 10549 | 11626 | 10771 | 11179 | 10969 | 11033 | 10510 | 10345 | 10032 | 9511  |
| antibody+2 peps/ 24+ | 6251    | 1646        | 4176 | 6437  | 8016  | 8631  | 8342  | 8249  | 8300  | 8236  | 7948  | 7790  | 7390  | 6981  |
| antibody+2 peps/ 23+ | 6519    | 605         | 1528 | 2366  | 2996  | 3227  | 3237  | 3040  | 3120  | 3062  | 3119  | 2996  | 2835  | 2712  |
| antibody+2 peps/ 22+ | 6820    | 144         | 363  | 527   | 715   | 775   | 805   | 697   | 744   | 716   | 780   | 849   | 803   | 815   |
| antibody+2 peps/ 21+ | 7143    | 50          | 50   | 50    | 50    | 50    | 50    | 50    | 50    | 50    | 50    | 50    | 50    | 50    |

|                   |      |      |      |      |      |      |      |      |      |      |      |      |      |      |
|-------------------|------|------|------|------|------|------|------|------|------|------|------|------|------|------|
| antibody fragment | 1000 | n.d. | 20   | 20   | 20   | 20   | 20   |
| antibody fragment | 1200 | n.d. | 20   | 20   | 20   | 20   | 20   |
| antibody fragment | 1471 | n.d. | 53   | 86   | 304  | 640  |
| antibody fragment | 1554 | n.d. | 87   | 69   | 111  | 225  | n.d. |
| antibody fragment | 1655 | n.d. | 104  | 231  | 728  | 1794 |
| antibody fragment | 1751 | n.d. | 184  | 278  | 493  | 685  | n.d. |
| antibody fragment | 1998 | n.d. | 186  | 345  | 523  | 834  | 1135 |
| antibody fragment | 2189 | n.d. | 44   | n.d. | n.d. | n.d. | n.d. |
| antibody fragment | 2331 | n.d. | 129  | 195  | 351  | 485  |
| antibody fragment | 2558 | n.d. | 20   | 20   | 20   | 20   | 20   |
| antibody fragment | 2591 | n.d. | 20   | 20   | 20   | 20   | 20   |
| antibody fragment | 2647 | n.d. | n.d. | n.d. | 20   | 20   | 20   | 20   | 20   | 20   | 20   | 20   | 20   | 20   |
| antibody fragment | 2819 | n.d. | n.d. | n.d. | 20   | 20   | 20   | 20   | 20   | 20   | n.d. | n.d. | n.d. | n.d. |
| antibody fragment | 3221 | n.d. | n.d. | n.d. | 20   | 20   | 20   | 20   | 20   | 20   | n.d. | n.d. | n.d. | n.d. |
| antibody fragment | 3336 | n.d. | n.d. | n.d. | 79   | 137  | 164  | 169  | 215  | 186  | 191  | 179  | 151  | 138  |
| antibody fragment | 3461 | n.d. | n.d. | n.d. | 171  | 298  | 350  | 316  | 361  | 431  | 399  | 345  | 283  | 175  |
| antibody fragment | 3590 | n.d. | n.d. | n.d. | 242  | 345  | 386  | 421  | 450  | 522  | 531  | 501  | 461  | 429  |
| antibody fragment | 3728 | n.d. | n.d. | n.d. | 196  | 256  | 286  | 304  | 320  | 319  | 309  | 321  | 276  | 247  |
| antibody fragment | 3886 | n.d. | n.d. | n.d. | 131  | 173  | 175  | 192  | 196  | 208  | 226  | 244  | 224  | 247  |
| antibody fragment | 4000 | n.d. | n.d. | n.d. | 20   | 20   | 20   | 20   | 20   | 20   | 20   | 20   | 20   | 20   |
| antibody fragment | 4300 | n.d. | n.d. | n.d. | 20   | 20   | 20   | 20   | 20   | 20   | 20   | 20   | 20   | 20   |

a) Imputed values necessary for optimized Gauss-fit are shown in red and are equal to the background intensity at the given m/z.

b) n.d.: value not determined / ion signal not present.

Table S3. continued

peptide 1, measurement 6

| ion / charge state   | m/z     | $\Delta$ CV |      |       |       |       |       |       |       |       |       |       |       |       |
|----------------------|---------|-------------|------|-------|-------|-------|-------|-------|-------|-------|-------|-------|-------|-------|
|                      |         | 2           | 4    | 6     | 8     | 12    | 16    | 20    | 30    | 40    | 50    | 60    | 70    | 80    |
| peptide dimer / 1+   | 3628.90 | 5           | 10   | 10    | 10    | 10    | 10    | 10    | 10    | 10    | 10    | 10    | 10    | 10    |
| peptide 1 / 1+       | 1814.95 | 5           | 10   | 12    | 13    | 11    | 16    | 14    | 32    | 53    | 100   | 164   | 206   | 369   |
| peptide 1 / 2+       | 907.99  | 50          | 87   | 263   | 384   | 754   | 1548  | 1988  | 4455  | 6759  | 12756 | 15931 | 16644 | 22661 |
| peptide 1 / 3+       | 605.71  | 37          | 61   | 112   | 160   | 267   | 458   | 615   | 1209  | 1711  | 2989  | 3391  | 3097  | 3972  |
| peptide 1 / 4+       | 454.49  | 10          | 10   | 10    | 10    | 10    | 10    | 10    | 10    | 10    | 10    | 10    | 10    | 10    |
| antibody+0 pep / 28+ | 5244    | 50          | 50   | 50    | 50    | 50    | 50    | 50    | 50    | 50    | 50    | 50    | 50    | 50    |
| antibody+0 pep / 27+ | 5421    | 158         | 188  | 436   | 644   | 570   | 628   | 590   | 662   | 517   | 648   | 657   | 603   | 1000  |
| antibody+0 pep / 26+ | 5631    | 862         | 1266 | 2479  | 3400  | 3119  | 3236  | 3036  | 3319  | 2714  | 3502  | 3467  | 3276  | 4741  |
| antibody+0 pep / 25+ | 5857    | 1986        | 3108 | 5438  | 6848  | 6828  | 7115  | 6377  | 7128  | 6089  | 7613  | 7838  | 7352  | 9602  |
| antibody+0 pep / 24+ | 6101    | 2047        | 3574 | 5524  | 6704  | 6753  | 7138  | 6271  | 6869  | 6226  | 7781  | 8127  | 7808  | 9439  |
| antibody+0 pep / 23+ | 6366    | 1069        | 1882 | 2778  | 3211  | 3579  | 3792  | 3185  | 3636  | 3585  | 4472  | 4989  | 4994  | 5535  |
| antibody+0 pep / 22+ | 6654    | 266         | 512  | 729   | 843   | 925   | 988   | 868   | 1049  | 1167  | 1559  | 1849  | 1842  | 2179  |
| antibody+0 pep / 21+ | 6971    | 50          | 50   | 50    | 50    | 50    | 50    | 50    | 50    | 50    | 50    | 50    | 50    | 50    |
| antibody+1 pep/ 28+  | 5304    | 50          | 50   | 50    | 50    | 50    | 50    | 50    | 50    | 50    | 50    | 50    | 50    | 50    |
| antibody+1 pep/ 27+  | 5488    | 471         | 609  | 1393  | 2049  | 1789  | 1872  | 1707  | 1951  | 1422  | 1895  | 1770  | 1645  | 2518  |
| antibody+1 pep/ 26+  | 5702    | 2379        | 3427 | 6426  | 8329  | 8055  | 8254  | 7632  | 8370  | 6754  | 8500  | 8042  | 7483  | 9795  |
| antibody+1 pep/ 25+  | 5930    | 4306        | 6973 | 11427 | 13951 | 13742 | 14296 | 12864 | 14211 | 11973 | 14326 | 14381 | 13274 | 16107 |
| antibody+1 pep/ 24+  | 6176    | 3566        | 6277 | 9478  | 11374 | 11611 | 11948 | 10365 | 11515 | 10525 | 11770 | 12532 | 11794 | 13735 |
| antibody+1 pep/ 23+  | 6443    | 1434        | 2620 | 3883  | 4512  | 4810  | 4960  | 4413  | 4794  | 4742  | 5537  | 6279  | 5961  | 6727  |
| antibody+1 pep/ 22+  | 6735    | 338         | 604  | 832   | 943   | 1111  | 1182  | 1005  | 1214  | 1309  | 1631  | 1922  | 1966  | 2165  |
| antibody+1 pep/ 21+  | 7057    | 50          | 50   | 50    | 50    | 50    | 50    | 50    | 50    | 50    | 50    | 50    | 50    | 50    |
| antibody+2 peps/ 28+ | 5368    | 50          | 50   | 50    | 50    | 50    | 50    | 50    | 50    | 50    | 50    | 50    | 50    | 50    |
| antibody+2 peps/ 27+ | 5556    | 389         | 497  | 1039  | 1418  | 1284  | 1309  | 1219  | 1345  | 1109  | 1211  | 1137  | 1069  | 1528  |
| antibody+2 peps/ 26+ | 5771    | 1519        | 2295 | 4058  | 4960  | 4655  | 4774  | 4526  | 4892  | 3909  | 4477  | 4167  | 3839  | 4836  |
| antibody+2 peps/ 25+ | 6000    | 2396        | 3925 | 5962  | 7129  | 7062  | 7162  | 6670  | 7001  | 6015  | 6304  | 6216  | 5700  | 6602  |
| antibody+2 peps/ 24+ | 6251    | 1656        | 2764 | 4098  | 4734  | 4934  | 5046  | 4481  | 4918  | 4260  | 4429  | 4547  | 4049  | 4548  |
| antibody+2 peps/ 23+ | 6519    | 518         | 906  | 1340  | 1489  | 1625  | 1710  | 1474  | 1540  | 1462  | 1613  | 1651  | 1506  | 1588  |
| antibody+2 peps/ 22+ | 6820    | 108         | 186  | 250   | 286   | 351   | 329   | 307   | 317   | 324   | 391   | 433   | 425   | 474   |
| antibody+2 peps/ 21+ | 7143    | 50          | 50   | 50    | 50    | 50    | 50    | 50    | 50    | 50    | 50    | 50    | 50    | 50    |

|                   |      |      |      |      |      |      |      |      |      |      |      |      |      |      |
|-------------------|------|------|------|------|------|------|------|------|------|------|------|------|------|------|
| antibody fragment | 1000 | n.d. | 20   | 20   | 20   | 20   |
| antibody fragment | 1200 | n.d. | 20   | 20   | 20   | 20   |
| antibody fragment | 1471 | n.d. | 32   | 52   | 120  | 438  |
| antibody fragment | 1554 | n.d. | 75   | n.d. | n.d. |
| antibody fragment | 1655 | n.d. | 151  | 362  | 1096 |
| antibody fragment | 1751 | n.d. | 168  | 265  | n.d. | n.d. |
| antibody fragment | 1892 | n.d. | 787  |
| antibody fragment | 1998 | n.d. | 178  | 299  | 405  | 633  |
| antibody fragment | 2189 | n.d. | 313  |
| antibody fragment | 2207 | n.d. | 20   |
| antibody fragment | 2331 | n.d. | 71   | n.d. | n.d. | 299  |
| antibody fragment | 2508 | n.d. | 248  | 403  | 515  |
| antibody fragment | 2558 | n.d. | 20   | n.d. | n.d. | 20   |
| antibody fragment | 2591 | n.d. | 20   | n.d. | n.d. | 20   |
| antibody fragment | 2647 | n.d. | n.d. | 20   | 20   | 20   | 20   | 20   | 20   | 20   | 20   | n.d. | n.d. | 20   |
| antibody fragment | 2819 | n.d. | n.d. | 20   | 20   | 20   | 20   | 20   | 20   | 20   | 99   | 133  | 329  | n.d. |
| antibody fragment | 2900 | n.d. | 20   | 20   | n.d. |
| antibody fragment | 3000 | n.d. | 20   | 20   | n.d. |
| antibody fragment | 3100 | n.d. | n.d. | 20   | 20   | 20   | 20   | 20   | 20   | 20   | n.d. | 20   | 20   | n.d. |
| antibody fragment | 3336 | n.d. | n.d. | n.d. | 119  | 150  | 141  | 169  | 176  | 192  | 197  | 147  | 137  | 127  |
| antibody fragment | 3461 | n.d. | n.d. | 53   | 235  | 258  | 276  | 305  | 379  | 334  | 333  | 296  | 213  | 175  |
| antibody fragment | 3590 | n.d. | n.d. | 83   | 301  | 359  | 409  | 333  | 406  | 430  | 406  | 439  | 376  | 400  |
| antibody fragment | 3728 | n.d. | n.d. | 80   | 218  | 225  | 259  | 231  | 266  | 273  | 263  | 274  | 236  | 222  |
| antibody fragment | 3886 | n.d. | n.d. | 60   | 148  | 132  | 164  | 135  | 154  | 172  | 186  | 170  | 195  | n.d. |
| antibody fragment | 4000 | n.d. | n.d. | 20   | 20   | 20   | 20   | 20   | 20   | 20   | 20   | 20   | 20   | 20   |
| antibody fragment | 4300 | n.d. | n.d. | 20   | 20   | 20   | 20   | 20   | 20   | 20   | 20   | 20   | 20   | 20   |

a) Imputed values necessary for optimized Gauss-fit are shown in red and are equal to the background intensity at the given m/z.

b) n.d.: value not determined / ion signal not present.



Table S3. continued

peptide 1, measurement 7

| ion / charge state   | m/z     | $\Delta$ CV |      |      |      |      |      |      |      |      |       |       |       |       |
|----------------------|---------|-------------|------|------|------|------|------|------|------|------|-------|-------|-------|-------|
|                      |         | 2           | 4    | 6    | 8    | 12   | 16   | 20   | 30   | 40   | 50    | 60    | 70    | 80    |
| peptide dimer / 1+   | 3628.90 | 5           | 5    | 5    | 5    | 10   | 10   | 10   | 10   | 10   | 10    | 10    | 10    | 10    |
| peptide 1 / 1+       | 1814.95 | 6           | 8    | 9    | 9    | 11   | 12   | 10   | 17   | 31   | 65    | 98    | 124   | 163   |
| peptide 1 / 2+       | 907.99  | 81          | 119  | 207  | 278  | 587  | 1064 | 1863 | 3971 | 7624 | 11970 | 14687 | 14962 | 16417 |
| peptide 1 / 3+       | 605.71  | 44          | 71   | 116  | 121  | 300  | 477  | 741  | 1423 | 2617 | 3843  | 4233  | 4056  | 4233  |
| peptide 1 / 4+       | 454.49  | 5           | 5    | 5    | 5    | 10   | 10   | 10   | 10   | 10   | 10    | 10    | 10    | 10    |
| antibody+0 pep / 28+ | 5244    | 50          | 50   | 50   | 50   | 50   | 50   | 50   | 50   | 50   | 50    | 50    | 50    | 50    |
| antibody+0 pep / 27+ | 5421    | 273         | 523  | 573  | 513  | 563  | 621  | 606  | 704  | 865  | 1046  | 1057  | 1009  | 1068  |
| antibody+0 pep / 26+ | 5631    | 782         | 1491 | 1600 | 1495 | 1653 | 1689 | 1822 | 2285 | 2717 | 3165  | 3332  | 3165  | 3362  |
| antibody+0 pep / 25+ | 5857    | 967         | 1743 | 1880 | 1877 | 2110 | 2156 | 2343 | 2848 | 3504 | 4165  | 4582  | 4309  | 4516  |
| antibody+0 pep / 24+ | 6101    | 617         | 1046 | 1137 | 1182 | 1301 | 1419 | 1499 | 1877 | 2472 | 2976  | 3329  | 3332  | 3362  |
| antibody+0 pep / 23+ | 6366    | 225         | 355  | 397  | 433  | 512  | 534  | 624  | 828  | 1155 | 1512  | 1693  | 1747  | 1854  |
| antibody+0 pep / 22+ | 6654    | 52          | 78   | 83   | 86   | 112  | 124  | 164  | 239  | 338  | 494   | 598   | 612   | 664   |
| antibody+0 pep / 21+ | 6971    | 50          | 50   | 50   | 50   | 50   | 50   | 50   | 50   | 50   | 50    | 50    | 50    | 50    |
| antibody+1 pep/ 28+  | 5304    | 50          | 50   | 50   | 50   | 50   | 50   | 50   | 50   | 50   | 50    | 50    | 50    | 50    |
| antibody+1 pep/ 27+  | 5488    | 974         | 1931 | 1995 | 1892 | 2065 | 2166 | 2318 | 2728 | 3296 | 3616  | 3810  | 3533  | 3610  |
| antibody+1 pep/ 26+  | 5702    | 2380        | 4319 | 4739 | 4509 | 4900 | 5203 | 5577 | 6636 | 7969 | 9272  | 9370  | 8965  | 9301  |
| antibody+1 pep/ 25+  | 5930    | 2284        | 4127 | 4366 | 4438 | 4987 | 4991 | 5423 | 6505 | 7984 | 9096  | 9692  | 9367  | 9575  |
| antibody+1 pep/ 24+  | 6176    | 1138        | 2024 | 2216 | 2306 | 2565 | 2645 | 2967 | 3560 | 4504 | 5366  | 5895  | 5636  | 5806  |
| antibody+1 pep/ 23+  | 6443    | 346         | 568  | 648  | 695  | 796  | 826  | 945  | 1227 | 1610 | 2123  | 2374  | 2398  | 2505  |
| antibody+1 pep/ 22+  | 6735    | 65          | 101  | 123  | 131  | 157  | 153  | 190  | 291  | 399  | 591   | 648   | 688   | 762   |
| antibody+1 pep/ 21+  | 7057    | 50          | 50   | 50   | 50   | 50   | 50   | 50   | 50   | 50   | 50    | 50    | 50    | 50    |
| antibody+2 peps/ 28+ | 5368    | 20          | 50   | 50   | 50   | 50   | 50   | 50   | 50   | 50   | 50    | 50    | 50    | 50    |
| antibody+2 peps/ 27+ | 5556    | 978         | 1753 | 1826 | 1723 | 1898 | 1956 | 2103 | 2423 | 2793 | 3052  | 3039  | 2890  | 2978  |
| antibody+2 peps/ 26+ | 5771    | 1833        | 3273 | 3480 | 3357 | 3656 | 3803 | 4131 | 4774 | 5516 | 5913  | 6088  | 5718  | 5752  |
| antibody+2 peps/ 25+ | 6000    | 1504        | 2424 | 2662 | 2680 | 2927 | 2944 | 3228 | 3811 | 4284 | 4665  | 4778  | 4453  | 4540  |
| antibody+2 peps/ 24+ | 6251    | 618         | 1037 | 1167 | 1175 | 1283 | 1314 | 1432 | 1600 | 1972 | 2116  | 2116  | 2162  | 2032  |
| antibody+2 peps/ 23+ | 6519    | 152         | 245  | 268  | 300  | 340  | 373  | 385  | 428  | 512  | 613   | 642   | 645   | 694   |
| antibody+2 peps/ 22+ | 6820    | 31          | 51   | 47   | 55   | 64   | 65   | 72   | 89   | 109  | 142   | 191   | 194   | 215   |
| antibody+2 peps/ 21+ | 7143    | 20          | 50   | 50   | 50   | 50   | 50   | 50   | 50   | 50   | 50    | 50    | 50    | 50    |

|                   |      |      |      |      |      |      |      |      |      |      |      |      |      |      |
|-------------------|------|------|------|------|------|------|------|------|------|------|------|------|------|------|
| antibody fragment | 1000 | n.d. | 20   | 20   | 20   |
| antibody fragment | 1200 | n.d. | 20   | 20   | 20   |
| antibody fragment | 1324 | n.d. | 20   | 20   | 39   | 68   | 179  |
| antibody fragment | 1471 | n.d. | 20   | 20   | 147  | 391  | 1199 |
| antibody fragment | 1554 | n.d. | 90   | 99   | n.d. | n.d. | n.d. |
| antibody fragment | 1655 | n.d. | 573  | 1813 |
| antibody fragment | 1751 | n.d. | 137  | 233  | 310  | n.d. | n.d. |
| antibody fragment | 1892 | n.d. | 827  |
| antibody fragment | 1998 | n.d. | 114  | 254  | 409  | 623  | 622  |
| antibody fragment | 2189 | n.d. | 61   | 158  | 250  | 410  | 513  |
| antibody fragment | 2331 | n.d. | 84   | n.d. | n.d. | n.d. |
| antibody fragment | 2508 | n.d. | 28   | 70   | 102  | 154  | 176  |
| antibody fragment | 2558 | n.d. | 20   | 20   | n.d. | n.d. | n.d. |
| antibody fragment | 2591 | n.d. | 20   | 20   | n.d. | n.d. | n.d. |
| antibody fragment | 2819 | n.d. | 40   | 72   | 103  |
| antibody fragment | 3220 | n.d. | 20   | 20   | 20   |
| antibody fragment | 3336 | n.d. | 20   | 20   | 20   |

a) Imputed values necessary for optimized Gauss-fit are shown in red and are equal to the background intensity at the given m/z.

b) n.d.: value not determined / ion signal not present.

**Table S4.** Ion species, charge states, m/z values and intensities for anti-Troponin I antibody complexed with Troponin I peptide 2 at measured collision cell voltage differences. <sup>a,b)</sup>

peptide 2, measurement 1

| ion / charge state   | m/z     | $\Delta CV$ |      |      |      |      |      |      |       |       |       |       |
|----------------------|---------|-------------|------|------|------|------|------|------|-------|-------|-------|-------|
|                      |         | 4           | 8    | 12   | 16   | 20   | 30   | 40   | 50    | 60    | 70    | 80    |
| peptide dimer / 1+   | 3572.80 | 5           | 10   | 10   | 10   | 10   | 10   | 10   | 10    | 10    | 10    | 10    |
| peptide 2 / 1+       | 1786.89 | 8           | 18   | 37   | 74   | 128  | 315  | 544  | 796   | 1169  | 1426  | 1554  |
| peptide 2 / 2+       | 893.98  | 73          | 282  | 759  | 1412 | 2423 | 5041 | 8050 | 11677 | 16517 | 17284 | 17168 |
| Peptide 2 / 3+       | 596.37  | 8           | 23   | 43   | 63   | 101  | 143  | 212  | 253   | 338   | 277   | 211   |
| peptide 2 / 4+       | 447.48  | 5           | 10   | 10   | 10   | 10   | 10   | 10   | 10    | 10    | 10    | 10    |
| antibody+0 pep / 27+ | 5436    | 50          | 50   | 50   | 50   | 50   | 50   | 50   | 50    | 50    | 50    | 50    |
| antibody+0 pep / 26+ | 5643    | 153         | 328  | 432  | 395  | 445  | 421  | 481  | 506   | 554   | 535   | 527   |
| antibody+0 pep / 25+ | 5869    | 478         | 996  | 1296 | 1256 | 1374 | 1349 | 1512 | 1693  | 1894  | 1778  | 1866  |
| antibody+0 pep / 24+ | 6113    | 739         | 1433 | 1810 | 1814 | 1896 | 2036 | 2296 | 2573  | 2804  | 2810  | 2787  |
| antibody+0 pep / 23+ | 6379    | 521         | 955  | 1201 | 1257 | 1282 | 1456 | 1674 | 1898  | 2194  | 2314  | 2207  |
| antibody+0 pep / 22+ | 6679    | 210         | 321  | 407  | 433  | 433  | 536  | 640  | 726   | 944   | 1014  | 1005  |
| antibody+0 pep / 21+ | 6988    | 50          | 50   | 50   | 50   | 50   | 50   | 50   | 50    | 50    | 50    | 50    |
| antibody+1 pep/ 27+  | 5503    | 50          | 50   | 50   | 50   | 50   | 50   | 50   | 50    | 50    | 50    | 50    |
| antibody+1 pep/ 26+  | 5712    | 832         | 1776 | 2363 | 2223 | 2488 | 2229 | 2483 | 2690  | 2754  | 2665  | 2568  |
| antibody+1 pep/ 25+  | 5940    | 2081        | 4230 | 5694 | 5571 | 5981 | 5806 | 6410 | 7072  | 7353  | 7177  | 7080  |
| antibody+1 pep/ 24+  | 6189    | 2665        | 5039 | 6661 | 6865 | 7097 | 7346 | 8028 | 8650  | 9515  | 9397  | 9231  |
| antibody+1 pep/ 23+  | 6463    | 1537        | 2694 | 3437 | 3665 | 3656 | 4095 | 4495 | 4868  | 5569  | 5913  | 5607  |
| antibody+1 pep/ 22+  | 6760    | 496         | 821  | 954  | 1071 | 990  | 1181 | 1330 | 1523  | 1780  | 2013  | 2034  |
| antibody+1 pep/ 21+  | 7075    | 50          | 50   | 50   | 50   | 50   | 50   | 50   | 50    | 50    | 50    | 50    |
| antibody+2 peps/ 27+ | 5567    | 50          | 50   | 50   | 50   | 50   | 50   | 50   | 50    | 50    | 50    | 50    |
| antibody+2 peps/ 26+ | 5778    | 1072        | 2230 | 3078 | 2988 | 3233 | 2799 | 2883 | 2944  | 2997  | 2829  | 2746  |
| antibody+2 peps/ 25+ | 6011    | 2338        | 4835 | 6364 | 6330 | 6538 | 6266 | 6475 | 6738  | 6798  | 6404  | 6305  |
| antibody+2 peps/ 24+ | 6261    | 2604        | 4868 | 6394 | 6533 | 6565 | 6573 | 6781 | 6770  | 7148  | 6889  | 6658  |
| antibody+2 peps/ 23+ | 6539    | 1254        | 2153 | 2715 | 2819 | 2714 | 2811 | 2776 | 2843  | 2925  | 3010  | 2852  |
| antibody+2 peps/ 22+ | 6836    | 342         | 550  | 650  | 692  | 625  | 698  | 658  | 652   | 691   | 795   | 737   |
| antibody+2 peps/ 21+ | 7158    | 50          | 50   | 50   | 50   | 50   | 50   | 50   | 50    | 50    | 50    | 50    |

|                   |      |      |      |      |      |      |      |      |      |      |      |      |
|-------------------|------|------|------|------|------|------|------|------|------|------|------|------|
| antibody fragment | 1200 | n.d. | n.d. | n.d. | n.d. | n.d. | n.d. | 20   | 20   | 20   | 20   | 20   |
| antibody fragment | 1324 | n.d. | n.d. | n.d. | n.d. | n.d. | n.d. | 20   | 20   | 20   | 20   | 20   |
| antibody fragment | 1471 | n.d. | 29   | 97   | 292  | 725  |
| antibody fragment | 1554 | n.d. | n.d. | n.d. | n.d. | n.d. | n.d. | 65   | 70   | n.d. | n.d. | n.d. |
| antibody fragment | 1655 | n.d. | 180  | 517  | 1334 |
| antibody fragment | 1748 | n.d. | n.d. | n.d. | n.d. | n.d. | n.d. | 117  | 220  | 322  | n.d. | n.d. |
| antibody fragment | 1851 | n.d. |
| antibody fragment | 1892 | n.d. |
| antibody fragment | 1998 | n.d. | n.d. | n.d. | n.d. | n.d. | n.d. | 84   | 195  | 336  | 521  | 621  |
| antibody fragment | 2160 | n.d. | n.d. | n.d. | n.d. | n.d. | n.d. | 20   | n.d. | n.d. | n.d. | n.d. |
| antibody fragment | 2174 | n.d. | n.d. | n.d. | n.d. | n.d. | n.d. | 20   | n.d. | n.d. | n.d. | n.d. |
| antibody fragment | 2189 | n.d. | 197  |
| antibody fragment | 2331 | n.d. | 49   | 100  | 155  | n.d. |
| antibody fragment | 2508 | n.d. | 20   | 20   | 46   | 58   |
| antibody fragment | 2591 | n.d. | 20   | 20   | 20   | 20   |
| antibody fragment | 2819 | n.d. | 20   | 20   |

a) Imputed values necessary for optimized Gauss-fit are shown in red and are equal to the background intensity at the given m/z.

b) n.d.: value not determined / ion signal not present.

Table S4. continued

peptide 2, measurement 2

| ion / charge state   | m/z     | $\Delta CV$ |      |      |      |      |      |      |      |      |      |      |      |      |
|----------------------|---------|-------------|------|------|------|------|------|------|------|------|------|------|------|------|
|                      |         | 2           | 4    | 6    | 8    | 12   | 16   | 20   | 30   | 40   | 50   | 60   | 70   | 80   |
| peptide dimer / 1+   | 3572.80 | 5           | 5    | 5    | 10   | 10   | 10   | 10   | 10   | 10   | 10   | 10   | 10   | 10   |
| peptide 2 / 1+       | 1786.88 | 6           | 7    | 8    | 17   | 27   | 45   | 72   | 149  | 251  | 426  | 161  | 679  | 767  |
| peptide 2 / 2+       | 893.93  | 58          | 90   | 145  | 222  | 549  | 868  | 1277 | 2585 | 4382 | 6437 | 7312 | 7553 | 7546 |
| peptide 2 / 3+       | 596.30  | 9           | 7    | 15   | 17   | 41   | 48   | 62   | 91   | 149  | 178  | 589  | 132  | 128  |
| peptide 2 / 4+       | 447.48  | 5           | 5    | 5    | 10   | 10   | 10   | 10   | 10   | 10   | 10   | 10   | 10   | 10   |
| antibody+0 pep / 29+ | 5061    | 50          | 50   | 50   | 50   | 50   | 50   | 50   | 50   | 50   | 50   | 50   | 50   | 50   |
| antibody+0 pep / 28+ | 5235    | 129         | 127  | 154  | 179  | 247  | 239  | 228  | 229  | 239  | 249  | 263  | 237  | 229  |
| antibody+0 pep / 27+ | 5427    | 461         | 457  | 461  | 585  | 762  | 781  | 818  | 753  | 868  | 794  | 811  | 785  | 813  |
| antibody+0 pep / 26+ | 5635    | 763         | 779  | 792  | 952  | 1244 | 1293 | 1281 | 1299 | 1397 | 1515 | 1546 | 1535 | 1586 |
| antibody+0 pep / 25+ | 5858    | 578         | 638  | 658  | 690  | 955  | 970  | 993  | 1052 | 1201 | 1409 | 1481 | 1528 | 1532 |
| antibody+0 pep / 24+ | 6103    | 251         | 288  | 286  | 325  | 371  | 399  | 448  | 545  | 671  | 860  | 943  | 958  | 967  |
| antibody+0 pep / 23+ | 6366    | 78          | 83   | 82   | 87   | 103  | 117  | 148  | 210  | 261  | 353  | 406  | 423  | 421  |
| antibody+0 pep / 22+ | 6670    | 50          | 50   | 50   | 50   | 50   | 50   | 50   | 50   | 50   | 50   | 50   | 50   | 50   |
| antibody+1 pep/ 29+  | 5120    | 50          | 50   | 50   | 50   | 50   | 50   | 50   | 50   | 50   | 50   | 50   | 50   | 50   |
| antibody+1 pep/ 28+  | 5299    | 761         | 749  | 763  | 926  | 1272 | 1293 | 1308 | 1263 | 1271 | 1155 | 1113 | 1025 | 1072 |
| antibody+1 pep/ 27+  | 5493    | 2220        | 2373 | 2518 | 2959 | 3739 | 3640 | 3770 | 3668 | 3787 | 3727 | 3625 | 3498 | 3457 |
| antibody+1 pep/ 26+  | 5703    | 3233        | 3354 | 3483 | 3915 | 4653 | 4720 | 4981 | 5077 | 5329 | 5664 | 5610 | 5615 | 5530 |
| antibody+1 pep/ 25+  | 5931    | 1987        | 2153 | 2251 | 2311 | 2629 | 2736 | 2919 | 3193 | 3559 | 3964 | 4224 | 4252 | 4261 |
| antibody+1 pep/ 24+  | 6176    | 743         | 771  | 825  | 823  | 896  | 965  | 1145 | 1334 | 1590 | 1965 | 2166 | 2192 | 2188 |
| antibody+1 pep/ 23+  | 6447    | 160         | 165  | 181  | 178  | 187  | 235  | 280  | 364  | 492  | 619  | 724  | 749  | 747  |
| antibody+1 pep/ 22+  | 6748    | 50          | 50   | 50   | 50   | 50   | 50   | 50   | 50   | 50   | 50   | 50   | 50   | 50   |
| antibody+2 peps/ 29+ | 5176    | 50          | 50   | 50   | 50   | 50   | 50   | 50   | 50   | 50   | 50   | 50   | 50   | 50   |
| antibody+2 peps/ 28+ | 5360    | 991         | 1036 | 1052 | 1257 | 1761 | 1770 | 1675 | 1682 | 1571 | 1363 | 1252 | 1143 | 1154 |
| antibody+2 peps/ 27+ | 5558    | 2767        | 2915 | 2998 | 3432 | 4397 | 4374 | 4404 | 4314 | 4183 | 3891 | 3604 | 3468 | 3315 |
| antibody+2 peps/ 26+ | 5771    | 3409        | 3685 | 3687 | 4053 | 4807 | 4816 | 4936 | 4838 | 4804 | 4816 | 4696 | 4500 | 4369 |
| antibody+2 peps/ 25+ | 5999    | 1841        | 1935 | 2010 | 2150 | 2311 | 2356 | 2533 | 2514 | 2618 | 2673 | 2737 | 2632 | 2510 |
| antibody+2 peps/ 24+ | 6251    | 582         | 601  | 622  | 638  | 650  | 681  | 711  | 800  | 856  | 843  | 884  | 884  | 846  |
| antibody+2 peps/ 23+ | 6519    | 100         | 111  | 118  | 107  | 107  | 124  | 121  | 143  | 172  | 194  | 200  | 215  | 247  |
| antibody+2 peps/ 22+ | 6823    | 50          | 50   | 50   | 50   | 50   | 50   | 50   | 50   | 50   | 50   | 50   | 50   | 50   |

|                   |      |      |      |      |      |      |      |      |      |      |      |      |      |      |
|-------------------|------|------|------|------|------|------|------|------|------|------|------|------|------|------|
| antibody fragment | 1000 | n.d. | 20   | 20   | 20   | 20   |
| antibody fragment | 1324 | n.d. | 33   | 44   | 118  |
| antibody fragment | 1471 | n.d. | 35   | 51   | 151  | 363  |
| antibody fragment | 1554 | n.d. | 54   | 79   | n.d. | n.d. |
| antibody fragment | 1655 | n.d. | 365  |
| antibody fragment | 1751 | n.d. | 67   | 125  | 127  | n.d. |
| antibody fragment | 1892 | n.d. | 73   | 172  |
| antibody fragment | 1998 | n.d. | 181  |
| antibody fragment | 2006 | n.d. | 59   | 105  | n.d. | n.d. |
| antibody fragment | 2160 | n.d. | 20   | 20   | 20   | 20   |
| antibody fragment | 2207 | n.d. | 20   | 20   | 20   | 20   |
| antibody fragment | 2508 | 20   | 20   | 20   | 20   | 20   | 20   | 20   | 20   | 20   | 66   | n.d. | n.d. |      |
| antibody fragment | 2819 | 20   | 20   | 20   | 20   | 20   | 20   | 20   | 20   | 20   | n.d. | 53   | 103  |      |
| antibody fragment | 3336 | 69   | 82   | 102  | 72   | 90   | 83   | 92   | 94   | 100  | 104  | n.d. | n.d. | n.d. |
| antibody fragment | 3461 | 176  | 164  | 171  | 181  | 188  | 207  | 215  | 209  | 227  | 204  | 176  | 146  | n.d. |
| antibody fragment | 3590 | n.d. | 162  | 144  |
| antibody fragment | 3728 | 89   | 86   | 93   | 90   | 112  | 117  | 125  | 132  | 119  | 139  | 147  | 111  | 87   |
| antibody fragment | 3886 | 44   | 44   | 44   | 46   | 68   | 67   | 68   | 73   | 80   | 75   | 68   | 72   | 82   |
| antibody fragment | 4200 | 20   | 20   | 20   | 20   | 20   | 20   | 20   | 20   | 20   | 20   | 20   | 20   | 20   |
| antibody fragment | 4400 | 20   | 20   | 20   | 20   | 20   | 20   | 20   | 20   | 20   | 20   | 20   | 20   | 20   |

a) Imputed values necessary for optimized Gauss-fit are shown in red and are equal to the background intensity at the given m/z.

b) n.d.: value not determined / ion signal not present.

Table S4. continued

peptide 2, measurement 3

| ion / charge state   | m/z     | $\Delta CV$ |      |      |       |       |       |       |       |       |       |       |       |       |
|----------------------|---------|-------------|------|------|-------|-------|-------|-------|-------|-------|-------|-------|-------|-------|
|                      |         | 2           | 4    | 6    | 8     | 12    | 16    | 20    | 30    | 40    | 50    | 60    | 70    | 80    |
| peptide dimer / 1+   | 3572.80 | 5           | 10   | 10   | 10    | 10    | 10    | 10    | 10    | 10    | 10    | 10    | 10    | 10    |
| peptide 2 / 1+       | 1786.90 | 5           | 11   | 19   | 26    | 74    | 143   | 238   | 493   | 701   | 1352  | 1862  | 1944  | 2023  |
| peptide 2 / 2+       | 893.95  | 80          | 131  | 381  | 688   | 1366  | 2225  | 3671  | 5541  | 7831  | 13860 | 15749 | 14776 | 14302 |
| peptide 2 / 3+       | 596.30  | 11          | 27   | 29   | 39    | 70    | 94    | 137   | 163   | 207   | 320   | 336   | 239   | 201   |
| peptide 2 / 4+       | 447.48  | 5           | 10   | 10   | 10    | 10    | 10    | 10    | 10    | 10    | 10    | 10    | 10    | 10    |
| antibody+0 pep / 28+ | 5235    | 50          | 50   | 50   | 50    | 50    | 50    | 50    | 50    | 50    | 50    | 50    | 50    | 50    |
| antibody+0 pep / 27+ | 5437    | 157         | 317  | 452  | 808   | 901   | 825   | 934   | 739   | 599   | 813   | 809   | 636   | 600   |
| antibody+0 pep / 26+ | 5647    | 700         | 1269 | 1855 | 2888  | 3158  | 2980  | 3205  | 2703  | 2314  | 3161  | 2958  | 2488  | 2322  |
| antibody+0 pep / 25+ | 5868    | 1168        | 2206 | 3109 | 4355  | 4561  | 4355  | 4704  | 4354  | 3912  | 5118  | 5049  | 4524  | 4278  |
| antibody+0 pep / 24+ | 6115    | 950         | 1688 | 2513 | 3355  | 3383  | 3276  | 3468  | 3580  | 3573  | 4489  | 4560  | 4379  | 4087  |
| antibody+0 pep / 23+ | 6373    | 417         | 725  | 1031 | 1347  | 1397  | 1388  | 1464  | 1654  | 1811  | 2332  | 2622  | 2443  | 2326  |
| antibody+0 pep / 22+ | 6654    | 103         | 175  | 252  | 311   | 339   | 353   | 380   | 490   | 585   | 830   | 899   | 942   | 886   |
| antibody+0 pep / 21+ | 6984    | 50          | 50   | 50   | 50    | 50    | 50    | 50    | 50    | 50    | 50    | 50    | 50    | 50    |
| antibody+1 pep/ 28+  | 5299    | 50          | 50   | 50   | 50    | 50    | 50    | 50    | 50    | 50    | 50    | 50    | 50    | 50    |
| antibody+1 pep/ 27+  | 5504    | 823         | 1396 | 2129 | 3804  | 4071  | 3770  | 4165  | 3194  | 2660  | 3647  | 3199  | 2573  | 2355  |
| antibody+1 pep/ 26+  | 5712    | 2575        | 4841 | 7106 | 10342 | 10903 | 10664 | 11269 | 9644  | 8621  | 10628 | 10095 | 8604  | 8102  |
| antibody+1 pep/ 25+  | 5938    | 3433        | 6573 | 9293 | 12789 | 13266 | 12888 | 13550 | 12690 | 11832 | 14229 | 13710 | 12540 | 11888 |
| antibody+1 pep/ 24+  | 6180    | 2367        | 4411 | 6277 | 8211  | 8285  | 8309  | 8337  | 8524  | 8699  | 10190 | 10530 | 9974  | 9335  |
| antibody+1 pep/ 23+  | 6449    | 810         | 1540 | 2156 | 2765  | 2743  | 2767  | 2805  | 3177  | 3506  | 4141  | 4713  | 4568  | 4427  |
| antibody+1 pep/ 22+  | 6737    | 175         | 310  | 433  | 556   | 556   | 557   | 588   | 747   | 944   | 1142  | 1307  | 1417  | 1339  |
| antibody+1 pep/ 21+  | 7066    | 50          | 50   | 50   | 50    | 50    | 50    | 50    | 50    | 50    | 50    | 50    | 50    | 50    |
| antibody+2 peps/ 28+ | 5360    | 50          | 50   | 50   | 50    | 50    | 50    | 50    | 50    | 50    | 50    | 50    | 50    | 50    |
| antibody+2 peps/ 27+ | 5566    | 923         | 1713 | 2498 | 3872  | 4215  | 3858  | 4253  | 3305  | 2848  | 3393  | 3008  | 2392  | 2220  |
| antibody+2 peps/ 26+ | 5774    | 2411        | 4633 | 6678 | 9027  | 9535  | 9079  | 9527  | 8345  | 7563  | 8498  | 7887  | 6804  | 6327  |
| antibody+2 peps/ 25+ | 5999    | 2779        | 5338 | 7468 | 9519  | 9733  | 9588  | 9750  | 9069  | 8832  | 9437  | 9113  | 8395  | 7612  |
| antibody+2 peps/ 24+ | 6246    | 1572        | 2915 | 4076 | 5117  | 5260  | 5127  | 5019  | 4998  | 5081  | 5260  | 5248  | 4969  | 4664  |
| antibody+2 peps/ 23+ | 6521    | 456         | 813  | 1149 | 1432  | 1431  | 1394  | 1367  | 1424  | 1540  | 1619  | 1641  | 1636  | 1524  |
| antibody+2 peps/ 22+ | 6817    | 83          | 147  | 192  | 239   | 259   | 254   | 239   | 294   | 314   | 375   | 415   | 453   | 447   |
| antibody+2 peps/ 21+ | 7145    | 50          | 50   | 50   | 50    | 50    | 50    | 50    | 50    | 50    | 50    | 50    | 50    | 50    |

|                   |      |      |      |      |      |      |      |      |      |      |      |      |      |      |
|-------------------|------|------|------|------|------|------|------|------|------|------|------|------|------|------|
| antibody fragment | 1000 | n.d. | 20   | 20   |
| antibody fragment | 1200 | n.d. | 20   | 20   |
| antibody fragment | 1324 | n.d. | 20   | 20   | 20   | 68   | 91   |
| antibody fragment | 1440 | n.d. | 20   | 20   | 20   | n.d. | n.d. |
| antibody fragment | 1471 | n.d. | 56   | 154  | 291  | 637  |
| antibody fragment | 1554 | n.d. | 72   | 83   | 118  | n.d. | n.d. |
| antibody fragment | 1655 | n.d. | 87   | 211  | 580  | 1475 |
| antibody fragment | 1751 | n.d. | 135  | 218  | 288  | n.d. | n.d. |
| antibody fragment | 1892 | n.d. | 805  |
| antibody fragment | 1998 | n.d. | 132  | 260  | 388  | 469  | 538  |
| antibody fragment | 2160 | n.d. | 43   | n.d. | n.d. | 181  | 230  |
| antibody fragment | 2189 | n.d. | 92   | n.d. | n.d. | 289  |
| antibody fragment | 2207 | n.d. | 20   | 20   | n.d. | n.d. | 186  |
| antibody fragment | 2331 | n.d. | 20   | 20   | 170  | n.d. | 248  |
| antibody fragment | 2559 | n.d. | 20   | 20   | 20   |
| antibody fragment | 2591 | n.d. | 20   | 20   | 20   |
| antibody fragment | 2647 | n.d. | n.d. | n.d. | 20   | 20   | 20   | 20   | 20   | 20   | 20   | 20   | 20   | 20   |
| antibody fragment | 2819 | n.d. | n.d. | n.d. | 20   | 20   | 20   | 20   | 20   | 20   | 20   | n.d. | n.d. | n.d. |
| antibody fragment | 3336 | n.d. | n.d. | n.d. | 96   | 132  | 132  | 167  | 161  | 165  | 172  | 148  | 110  | 128  |
| antibody fragment | 3461 | n.d. | n.d. | n.d. | 254  | 315  | 339  | 333  | 387  | 396  | 464  | 383  | 232  | n.d. |
| antibody fragment | 3590 | n.d. | 379  | 387  |
| antibody fragment | 3728 | n.d. | n.d. | n.d. | 210  | 241  | 233  | 282  | 252  | 309  | 297  | 325  | 268  | n.d. |
| antibody fragment | 3886 | n.d. | n.d. | n.d. | 103  | 109  | 135  | 130  | 138  | 141  | 161  | 189  | 179  | 224  |
| antibody fragment | 4000 | n.d. | n.d. | n.d. | 20   | 20   | 20   | 20   | 20   | 20   | 20   | 20   | 20   | 20   |
| antibody fragment | 4200 | n.d. | n.d. | n.d. | 20   | 20   | 20   | 20   | 20   | 20   | 20   | 20   | 20   | 20   |

a) Imputed values necessary for optimized Gauss-fit are shown in red and are equal to the background intensity at the given m/z.

b) n.d.: value not determined / ion signal not present.



Table S4. continued

peptide 2, measurement 4

| ion / charge state   | m/z     | $\Delta CV$ |      |      |      |      |      |      |      |      |       |       |       |       |
|----------------------|---------|-------------|------|------|------|------|------|------|------|------|-------|-------|-------|-------|
|                      |         | 2           | 4    | 6    | 8    | 12   | 16   | 20   | 30   | 40   | 50    | 60    | 70    | 80    |
| peptide dimer / 1+   | 3572.80 | 5           | 10   | 10   | 10   | 10   | 10   | 10   | 10   | 10   | 10    | 10    | 10    | 10    |
| peptide 2 / 1+       | 1786.90 | 7           | 14   | 13   | 17   | 30   | 55   | 118  | 224  | 363  | 635   | 762   | 1029  | 1055  |
| peptide 2 / 2+       | 893.95  | 123         | 272  | 406  | 650  | 1219 | 2121 | 3215 | 5193 | 7238 | 11203 | 13397 | 15021 | 14756 |
| peptide 2 / 3+       | 596.30  | 15          | 32   | 33   | 55   | 95   | 140  | 185  | 235  | 312  | 405   | 363   | 356   | 272   |
| peptide 2 / 4+       | 447.48  | 5           | 10   | 10   | 10   | 10   | 10   | 10   | 10   | 10   | 10    | 10    | 10    | 10    |
| antibody+0 pep / 29+ | 5058    | 50          | 50   | 50   | 50   | 50   | 50   | 50   | 50   | 50   | 50    | 50    | 50    | 50    |
| antibody+0 pep / 28+ | 5235    | 66          | 110  | 153  | 170  | 188  | 192  | 205  | 195  | 178  | 208   | 219   | 251   | 250   |
| antibody+0 pep / 27+ | 5437    | 426         | 714  | 886  | 1039 | 1147 | 1088 | 1133 | 1099 | 1007 | 1190  | 1278  | 1407  | 1362  |
| antibody+0 pep / 26+ | 5647    | 1158        | 2012 | 2300 | 2554 | 2768 | 2773 | 2909 | 2903 | 2714 | 3235  | 3623  | 4003  | 3784  |
| antibody+0 pep / 25+ | 5868    | 1338        | 2256 | 2502 | 2827 | 3059 | 3142 | 3164 | 3258 | 3260 | 4058  | 4446  | 4842  | 4763  |
| antibody+0 pep / 24+ | 6115    | 745         | 1304 | 1400 | 1534 | 1660 | 1748 | 1817 | 2014 | 2150 | 2752  | 3071  | 3375  | 3294  |
| antibody+0 pep / 23+ | 6373    | 246         | 408  | 441  | 500  | 551  | 598  | 667  | 780  | 965  | 1269  | 1478  | 1577  | 1564  |
| antibody+0 pep / 22+ | 6668    | 50          | 50   | 50   | 50   | 50   | 50   | 50   | 50   | 50   | 50    | 50    | 50    | 50    |
| antibody+1 pep/ 29+  | 5117    | 50          | 50   | 50   | 50   | 50   | 50   | 50   | 50   | 50   | 50    | 50    | 50    | 50    |
| antibody+1 pep/ 28+  | 5292    | 264         | 514  | 630  | 729  | 815  | 832  | 842  | 772  | 657  | 750   | 836   | 882   | 826   |
| antibody+1 pep/ 27+  | 5504    | 1760        | 3097 | 3623 | 4164 | 4364 | 4256 | 4497 | 4184 | 3777 | 4339  | 4706  | 4931  | 4769  |
| antibody+1 pep/ 26+  | 5712    | 3888        | 6770 | 7695 | 8525 | 8939 | 8992 | 9252 | 8973 | 8511 | 9964  | 10642 | 11293 | 10839 |
| antibody+1 pep/ 25+  | 5938    | 3472        | 5967 | 6625 | 7683 | 7710 | 7924 | 8009 | 8099 | 8122 | 9556  | 10284 | 10999 | 10726 |
| antibody+1 pep/ 24+  | 6180    | 1635        | 2669 | 3003 | 3344 | 3590 | 3677 | 3781 | 3975 | 4271 | 5244  | 5739  | 6214  | 6041  |
| antibody+1 pep/ 23+  | 6449    | 426         | 669  | 766  | 887  | 897  | 979  | 1006 | 1197 | 1324 | 1824  | 2048  | 2305  | 2224  |
| antibody+1 pep/ 22+  | 6745    | 50          | 50   | 50   | 50   | 50   | 50   | 50   | 50   | 50   | 50    | 50    | 50    | 50    |
| antibody+2 peps/ 29+ | 5173    | 50          | 50   | 50   | 50   | 50   | 50   | 50   | 50   | 50   | 50    | 50    | 50    | 50    |
| antibody+2 peps/ 28+ | 5355    | 317         | 624  | 759  | 808  | 868  | 882  | 865  | 809  | 710  | 766   | 782   | 858   | 796   |
| antibody+2 peps/ 27+ | 5566    | 1759        | 3098 | 3609 | 4003 | 4115 | 4116 | 4147 | 3849 | 3376 | 3856  | 3866  | 4267  | 3972  |
| antibody+2 peps/ 26+ | 5774    | 3256        | 5645 | 6344 | 7109 | 7069 | 7048 | 7227 | 6781 | 6343 | 6980  | 7169  | 7690  | 7266  |
| antibody+2 peps/ 25+ | 5999    | 2286        | 3837 | 4249 | 4852 | 4901 | 4982 | 4930 | 4878 | 4552 | 5129  | 5288  | 5553  | 5194  |
| antibody+2 peps/ 24+ | 6246    | 878         | 1408 | 1604 | 1732 | 1780 | 1860 | 1827 | 1820 | 1804 | 2054  | 2177  | 2264  | 2123  |
| antibody+2 peps/ 23+ | 6521    | 184         | 289  | 305  | 363  | 363  | 418  | 386  | 411  | 427  | 510   | 567   | 603   | 584   |

| antibody+2 peps/ 22+ | 6820 | 50   | 50   | 50   | 50   | 50   | 50   | 50   | 50   | 50   | 50   | 50   | 50   | 50   |
|----------------------|------|------|------|------|------|------|------|------|------|------|------|------|------|------|
|                      |      |      |      |      |      |      |      |      |      |      |      |      |      |      |
| antibody fragment    | 1000 | n.d. | 20   | 20   |
| antibody fragment    | 1200 | n.d. | 20   | 20   | 20   |
| antibody fragment    | 1324 | n.d. | 20   | 75   | 145  |
| antibody fragment    | 1440 | n.d. | 20   | 20   | n.d. | n.d. | n.d. |
| antibody fragment    | 1471 | n.d. | 20   | 20   | 112  | 454  | 1137 |
| antibody fragment    | 1554 | n.d. | 79   | 85   | n.d. | n.d. | n.d. |
| antibody fragment    | 1655 | n.d. | 165  | 704  | 1784 |
| antibody fragment    | 1751 | n.d. | 141  | 194  | 268  | n.d. | n.d. |
| antibody fragment    | 1892 | n.d. | 808  |
| antibody fragment    | 1998 | n.d. | 109  | 281  | 353  | 547  | 554  |
| antibody fragment    | 2189 | n.d. | 50   | 81   | 142  | 230  | 315  |
| antibody fragment    | 2207 | n.d. | 20   | n.d. | n.d. | n.d. | n.d. |
| antibody fragment    | 2331 | n.d. | 20   | n.d. | n.d. | n.d. | n.d. |
| antibody fragment    | 2508 | n.d. | 55   | 97   | 176  | 203  |
| antibody fragment    | 2559 | n.d. | 20   | 20   | n.d. | n.d. |
| antibody fragment    | 2591 | n.d. | 20   | 20   | n.d. | n.d. |
| antibody fragment    | 2819 | n.d. | 77   | 131  |
| antibody fragment    | 3336 | n.d. | 20   | 20   |
| antibody fragment    | 3461 | n.d. | 20   | 20   |

a) Imputed values necessary for optimized Gauss-fit are shown in red and are equal to the background intensity at the given m/z.

b) n.d.: value not determined / ion signal not present.

Table S4. continued

peptide 2, measurement 5

| ion / charge state   | m/z     | $\Delta$ CV |      |      |      |      |       |       |       |       |       |       |       |       |
|----------------------|---------|-------------|------|------|------|------|-------|-------|-------|-------|-------|-------|-------|-------|
|                      |         | 2           | 4    | 6    | 8    | 12   | 16    | 20    | 30    | 40    | 50    | 60    | 70    | 80    |
| peptide dimer / 1+   | 3572.80 | 5           | 10   | 10   | 10   | 10   | 10    | 10    | 10    | 10    | 10    | 10    | 10    | 10    |
| peptide 2 / 1+       | 1786.90 | 6           | 16   | 19   | 17   | 45   | 78    | 150   | 326   | 515   | 689   | 911   | 1030  | 1107  |
| peptide 2 / 2+       | 893.95  | 114         | 274  | 570  | 750  | 1467 | 2563  | 3902  | 7204  | 10707 | 13126 | 15382 | 15624 | 15892 |
| peptide 2 / 3+       | 596.30  | 20          | 42   | 47   | 60   | 99   | 165   | 216   | 309   | 418   | 455   | 438   | 366   | 308   |
| peptide 2 / 4+       | 447.48  | 5           | 10   | 10   | 10   | 10   | 10    | 10    | 10    | 10    | 10    | 10    | 10    | 10    |
|                      |         |             |      |      |      |      |       |       |       |       |       |       |       |       |
| antibody+0 pep / 29+ | 5058    | 50          | 50   | 50   | 50   | 50   | 50    | 50    | 50    | 50    | 50    | 50    | 50    | 50    |
| antibody+0 pep / 28+ | 5235    | 65          | 121  | 172  | 183  | 213  | 210   | 233   | 249   | 244   | 251   | 246   | 243   | 254   |
| antibody+0 pep / 27+ | 5437    | 407         | 774  | 920  | 1041 | 1154 | 1272  | 1323  | 1374  | 1378  | 1430  | 1456  | 1423  | 1381  |
| antibody+0 pep / 26+ | 5647    | 1164        | 2143 | 2417 | 2675 | 2927 | 3112  | 3223  | 3528  | 3572  | 3840  | 3925  | 3955  | 3935  |
| antibody+0 pep / 25+ | 5868    | 1450        | 2334 | 2769 | 3030 | 3164 | 3382  | 3516  | 3984  | 4341  | 4702  | 4908  | 4923  | 4893  |
| antibody+0 pep / 24+ | 6115    | 812         | 1291 | 1497 | 1649 | 1736 | 1924  | 1978  | 2455  | 2749  | 3064  | 3318  | 3439  | 3411  |
| antibody+0 pep / 23+ | 6373    | 263         | 414  | 477  | 510  | 570  | 643   | 709   | 942   | 1152  | 1420  | 1576  | 1592  | 1605  |
| antibody+0 pep / 22+ | 6668    | 50          | 50   | 50   | 50   | 50   | 50    | 50    | 50    | 50    | 50    | 50    | 50    | 50    |
|                      |         |             |      |      |      |      |       |       |       |       |       |       |       |       |
| antibody+1 pep/ 29+  | 5117    | 50          | 50   | 50   | 50   | 50   | 50    | 50    | 50    | 50    | 50    | 50    | 50    | 50    |
| antibody+1 pep/ 28+  | 5292    | 295         | 515  | 716  | 783  | 891  | 934   | 943   | 1012  | 946   | 958   | 945   | 910   | 909   |
| antibody+1 pep/ 27+  | 5504    | 1755        | 3213 | 3865 | 4194 | 4589 | 4859  | 4900  | 5192  | 5120  | 5187  | 5105  | 5020  | 4901  |
| antibody+1 pep/ 26+  | 5712    | 4122        | 6995 | 8168 | 8866 | 9568 | 10034 | 10257 | 10947 | 11083 | 11385 | 11484 | 11495 | 11383 |
| antibody+1 pep/ 25+  | 5938    | 3706        | 6228 | 7289 | 7662 | 8251 | 8700  | 8862  | 9633  | 10285 | 10803 | 11242 | 11192 | 11117 |
| antibody+1 pep/ 24+  | 6180    | 1775        | 2866 | 3235 | 3604 | 3821 | 3992  | 4120  | 4650  | 5305  | 5862  | 6178  | 6254  | 6367  |
| antibody+1 pep/ 23+  | 6449    | 462         | 729  | 808  | 877  | 969  | 1112  | 1139  | 1368  | 1651  | 1951  | 2148  | 2201  | 2217  |
| antibody+1 pep/ 22+  | 6745    | 50          | 50   | 50   | 50   | 50   | 50    | 50    | 50    | 50    | 50    | 50    | 50    | 50    |
|                      |         |             |      |      |      |      |       |       |       |       |       |       |       |       |
| antibody+2 peps/ 29+ | 5173    | 50          | 50   | 50   | 50   | 50   | 50    | 50    | 50    | 50    | 50    | 50    | 50    | 50    |
| antibody+2 peps/ 28+ | 5355    | 327         | 630  | 756  | 854  | 933  | 1014  | 974   | 1024  | 975   | 877   | 871   | 875   | 815   |
| antibody+2 peps/ 27+ | 5566    | 1844        | 3265 | 3705 | 4020 | 4375 | 4612  | 4587  | 4695  | 4548  | 4337  | 4333  | 4106  | 4076  |
| antibody+2 peps/ 26+ | 5774    | 3391        | 5881 | 6669 | 7243 | 7650 | 7953  | 7890  | 8164  | 8094  | 7912  | 7804  | 7626  | 7592  |
| antibody+2 peps/ 25+ | 5999    | 2537        | 4146 | 4691 | 5065 | 5305 | 5424  | 5391  | 5593  | 5670  | 5615  | 5643  | 5516  | 5354  |
| antibody+2 peps/ 24+ | 6246    | 964         | 1529 | 1750 | 1865 | 2031 | 2009  | 2053  | 2073  | 2155  | 2154  | 2273  | 2169  | 2254  |
| antibody+2 peps/ 23+ | 6521    | 204         | 292  | 326  | 385  | 404  | 430   | 433   | 451   | 482   | 521   | 562   | 582   | 579   |

|                             |      |      |      |      |      |      |      |      |      |      |      |      |      |      |
|-----------------------------|------|------|------|------|------|------|------|------|------|------|------|------|------|------|
| <b>antibody+2 peps/ 22+</b> | 6820 | 50   | 50   | 50   | 50   | 50   | 50   | 50   | 50   | 50   | 50   | 50   | 50   | 50   |
| <b>antibody fragment</b>    | 1000 | n.d. | 20   | 20   |
| <b>antibody fragment</b>    | 1200 | n.d. | 20   | 20   |
| <b>antibody fragment</b>    | 1324 | n.d. | 20   | 20   | 73   | 154  |
| <b>antibody fragment</b>    | 1440 | n.d. | 20   | 20   | 20   | n.d. | n.d. |
| <b>antibody fragment</b>    | 1471 | n.d. | 20   | 64   | 163  | 365  | 1112 |
| <b>antibody fragment</b>    | 1554 | n.d. | 106  | n.d. | n.d. | n.d. | n.d. |
| <b>antibody fragment</b>    | 1655 | n.d. | 688  | 1821 |
| <b>antibody fragment</b>    | 1751 | n.d. | 183  | 207  | 274  | n.d. | n.d. |
| <b>antibody fragment</b>    | 1892 | n.d. | 799  |
| <b>antibody fragment</b>    | 1998 | n.d. | 144  | 255  | 365  | 521  | 496  |
| <b>antibody fragment</b>    | 2189 | n.d. | 43   | n.d. | n.d. | 206  | 289  |
| <b>antibody fragment</b>    | 2207 | n.d. | 20   | n.d. | n.d. | n.d. | n.d. |
| <b>antibody fragment</b>    | 2331 | n.d. | 20   | 100  | 130  | n.d. | n.d. |
| <b>antibody fragment</b>    | 2508 | n.d. | 46   | 116  | 185  | 240  |
| <b>antibody fragment</b>    | 2819 | n.d. | 34   | 51   | 71   | 121  |
| <b>antibody fragment</b>    | 3336 | n.d. | 20   | 20   | 20   | 20   |
| <b>antibody fragment</b>    | 3461 | n.d. | 20   | 20   | 20   | 20   |

a) Imputed values necessary for optimized Gauss-fit are shown in red and are equal to the background intensity at the given m/z.

b) n.d.: value not determined / ion signal not present.

**Table S5.** Ion species, charge states, m/z values and intensities for anti-Troponin I antibody complexed with Troponin I peptide 3 at measured collision cell voltage differences. <sup>a,b)</sup>

peptide 3, measurement 1

| ion / charge state   | m/z     | $\Delta CV$ |      |      |      |      |      |      |      |      |      |      |      |      |
|----------------------|---------|-------------|------|------|------|------|------|------|------|------|------|------|------|------|
|                      |         | 2           | 4    | 6    | 8    | 12   | 16   | 20   | 30   | 40   | 50   | 60   | 70   | 80   |
| peptide dimer / 1+   | 3590.78 | 10          | 10   | 10   | 10   | 10   | 10   | 10   | 10   | 10   | 10   | 10   | 10   | 10   |
| peptide 4 / 1+       | 1795.89 | 10          | 11   | 11   | 18   | 13   | 10   | 10   | 17   | 25   | 51   | 61   | 84   | 86   |
| peptide 4 / 2+       | 898.47  | 136         | 222  | 478  | 612  | 772  | 740  | 827  | 1375 | 1784 | 3386 | 3942 | 3972 | 3655 |
| peptide 4 / 3+       | 599.34  | 19          | 39   | 54   | 79   | 92   | 78   | 92   | 112  | 149  | 266  | 276  | 230  | 177  |
| peptide 4 / 4+       | 449.72  | 10          | 10   | 10   | 10   | 10   | 10   | 10   | 10   | 10   | 10   | 10   | 10   | 10   |
|                      |         |             |      |      |      |      |      |      |      |      |      |      |      |      |
| antibody+0 pep / 29+ | 5055    | 50          | 50   | 50   | 50   | 50   | 50   | 50   | 50   | 50   | 50   | 50   | 50   | 50   |
| antibody+0 pep / 28+ | 5234    | 176         | 234  | 465  | 419  | 451  | 291  | 253  | 241  | 203  | 252  | 264  | 242  | 215  |
| antibody+0 pep / 27+ | 5430    | 1346        | 1883 | 2820 | 2804 | 2587 | 1835 | 1475 | 1386 | 1284 | 1706 | 1711 | 1647 | 1401 |
| antibody+0 pep / 26+ | 5638    | 4288        | 6003 | 7545 | 7853 | 6437 | 4890 | 3966 | 3591 | 3609 | 4756 | 4999 | 4899 | 4521 |
| antibody+0 pep / 25+ | 5864    | 5466        | 7679 | 8600 | 9428 | 7191 | 5621 | 4432 | 3961 | 4169 | 5997 | 6240 | 6168 | 5846 |
| antibody+0 pep / 24+ | 6108    | 3413        | 4643 | 4898 | 5579 | 3889 | 3231 | 2552 | 2279 | 2597 | 3865 | 4195 | 4240 | 3851 |
| antibody+0 pep / 23+ | 6378    | 1187        | 1557 | 1604 | 1867 | 1252 | 1019 | 867  | 774  | 943  | 1508 | 1613 | 1709 | 1632 |
| antibody+0 pep / 22+ | 6664    | 50          | 50   | 50   | 50   | 50   | 50   | 50   | 50   | 50   | 50   | 50   | 50   | 50   |
|                      |         |             |      |      |      |      |      |      |      |      |      |      |      |      |
| antibody+1 pep/ 29+  | 5119    | 50          | 50   | 50   | 50   | 50   | 50   | 50   | 50   | 50   | 50   | 50   | 50   | 50   |
| antibody+1 pep/ 28+  | 5300    | 255         | 308  | 596  | 513  | 534  | 355  | 279  | 295  | 237  | 288  | 300  | 294  | 265  |
| antibody+1 pep/ 27+  | 5497    | 1577        | 2218 | 3049 | 2977 | 2731 | 1978 | 1537 | 1374 | 1336 | 1666 | 1658 | 1664 | 1440 |
| antibody+1 pep/ 26+  | 5708    | 4174        | 5908 | 7131 | 7382 | 5882 | 4315 | 3477 | 3009 | 3026 | 4068 | 4035 | 4168 | 3616 |
| antibody+1 pep/ 25+  | 5937    | 4511        | 6242 | 6823 | 7387 | 5269 | 4107 | 3241 | 2775 | 2900 | 4098 | 4212 | 4289 | 3935 |
| antibody+1 pep/ 24+  | 6185    | 2386        | 3255 | 3409 | 3758 | 2574 | 2094 | 1605 | 1441 | 1567 | 2284 | 2322 | 2393 | 2262 |
| antibody+1 pep/ 23+  | 6459    | 704         | 894  | 923  | 1038 | 712  | 578  | 454  | 411  | 487  | 734  | 825  | 845  | 776  |
| antibody+1 pep/ 22+  | 6747    | 50          | 50   | 50   | 50   | 50   | 50   | 50   | 50   | 50   | 50   | 50   | 50   | 50   |
|                      |         |             |      |      |      |      |      |      |      |      |      |      |      |      |
| antibody+2 peps/ 29+ | 5178    | 50          | 50   | 50   | 50   | 50   | 50   | 50   | 50   | 50   | 50   | 50   | 50   | 50   |
| antibody+2 peps/ 28+ | 5364    | 97          | 114  | 214  | 187  | 194  | 116  | 118  | 102  | 86   | 101  | 96   | 104  | 92   |
| antibody+2 peps/ 27+ | 5555    | 462         | 659  | 909  | 891  | 772  | 575  | 432  | 360  | 361  | 445  | 416  | 437  | 364  |
| antibody+2 peps/ 26+ | 5778    | 1118        | 1473 | 1789 | 1860 | 1416 | 1001 | 797  | 729  | 685  | 887  | 852  | 858  | 798  |
| antibody+2 peps/ 25+ | 6009    | 988         | 1337 | 1520 | 1595 | 1164 | 850  | 682  | 594  | 591  | 761  | 771  | 745  | 667  |
| antibody+2 peps/ 24+ | 6256    | 476         | 621  | 657  | 737  | 518  | 389  | 322  | 301  | 292  | 378  | 429  | 394  | 336  |

|                             |      |      |      |      |      |      |      |      |      |      |      |      |      |      |
|-----------------------------|------|------|------|------|------|------|------|------|------|------|------|------|------|------|
| <b>antibody+2 peps/ 23+</b> | 6530 | 130  | 158  | 157  | 188  | 130  | 111  | 89   | 93   | 97   | 142  | 140  | 153  | 133  |
| <b>antibody+2 peps/ 22+</b> | 6825 | 50   | 50   | 50   | 50   | 50   | 50   | 50   | 50   | 50   | 50   | 50   | 50   | 50   |
| <b>antibody fragment</b>    | 1000 | n.d. | 20   | 20   |
| <b>antibody fragment</b>    | 1200 | n.d. | 20   | 20   | 20   |
| <b>antibody fragment</b>    | 1324 | n.d. | 20   | 20   | 20   | 27   | 28   |
| <b>antibody fragment</b>    | 1471 | n.d. | 20   | 43   | 106  | 190  |
| <b>antibody fragment</b>    | 1554 | n.d. | 39   | n.d. | n.d. | n.d. | n.d. |
| <b>antibody fragment</b>    | 1655 | n.d. | 75   | 147  | 363  |
| <b>antibody fragment</b>    | 1751 | n.d. | 48   | 76   | n.d. | n.d. | n.d. |
| <b>antibody fragment</b>    | 1892 | n.d. | 262  |
| <b>antibody fragment</b>    | 1998 | n.d. | 42   | 112  | 149  | 262  | 189  |
| <b>antibody fragment</b>    | 2006 | n.d. |
| <b>antibody fragment</b>    | 2152 | n.d. | 20   | n.d. | n.d. | n.d. | n.d. |
| <b>antibody fragment</b>    | 2331 | n.d. | 45   | n.d. | 88   | n.d. |
| <b>antibody fragment</b>    | 2508 | n.d. | 20   | 70   | 66   | 94   |
| <b>antibody fragment</b>    | 2819 | n.d. | 20   | 33   | 56   | 56   |
| <b>antibody fragment</b>    | 3336 | n.d. | 20   | 20   | 20   |
| <b>antibody fragment</b>    | 3461 | n.d. | 20   | 20   | 20   |

a) Imputed values necessary for optimized Gauss-fit are shown in red and are equal to the background intensity at the given m/z.

b) n.d.: value not determined / ion signal not present.

Table S5. continued

peptide 3, measurement 2

| ion / charge state   | m/z     | $\Delta CV$ |      |      |      |      |      |      |      |      |      |      |      |      |
|----------------------|---------|-------------|------|------|------|------|------|------|------|------|------|------|------|------|
|                      |         | 2           | 4    | 6    | 8    | 12   | 16   | 20   | 30   | 40   | 50   | 60   | 70   | 80   |
| peptide dimer / 1+   | 3590.78 | 5           | 5    | 5    | 5    | 10   | 10   | 10   | 10   | 10   | 10   | 10   | 10   | 10   |
| peptide 4 / 1+       | 1795.89 | 5           | 8    | 7    | 7    | 11   | 8    | 9    | 19   | 38   | 62   | 74   | 89   | 137  |
| peptide 4 / 2+       | 898.47  | 45          | 75   | 135  | 185  | 377  | 732  | 1147 | 2019 | 3338 | 4612 | 5142 | 5472 | 5429 |
| peptide 4 / 3+       | 599.34  | 6           | 14   | 15   | 25   | 43   | 87   | 118  | 198  | 250  | 342  | 356  | 349  | 316  |
| peptide 4 / 4+       | 449.72  | 5           | 5    | 5    | 5    | 10   | 10   | 10   | 10   | 10   | 10   | 10   | 10   | 10   |
| antibody+0 pep / 29+ | 5055    | 50          | 50   | 50   | 50   | 50   | 50   | 50   | 50   | 50   | 50   | 50   | 50   | 50   |
| antibody+0 pep / 28+ | 5234    | 76          | 171  | 174  | 192  | 215  | 218  | 223  | 236  | 264  | 268  | 283  | 271  | 266  |
| antibody+0 pep / 27+ | 5430    | 545         | 1165 | 1290 | 1246 | 1422 | 1530 | 1572 | 1649 | 1801 | 1933 | 1961 | 1943 | 1883 |
| antibody+0 pep / 26+ | 5638    | 1618        | 3480 | 3637 | 3875 | 4171 | 4428 | 4714 | 4963 | 5319 | 5840 | 6036 | 5971 | 5947 |
| antibody+0 pep / 25+ | 5864    | 2175        | 4328 | 4653 | 4758 | 5145 | 5645 | 5757 | 6377 | 6945 | 7690 | 8225 | 8215 | 8136 |
| antibody+0 pep / 24+ | 6108    | 1330        | 2696 | 2940 | 3096 | 3359 | 3468 | 3719 | 4034 | 4666 | 5335 | 5481 | 5702 | 5879 |
| antibody+0 pep / 23+ | 6378    | 468         | 933  | 1013 | 1096 | 1147 | 1243 | 1313 | 1547 | 1849 | 2104 | 2315 | 2414 | 2514 |
| antibody+0 pep / 22+ | 6664    | 50          | 50   | 50   | 50   | 50   | 50   | 50   | 50   | 50   | 50   | 50   | 50   | 50   |
| antibody+1 pep/ 29+  | 5119    | 50          | 50   | 50   | 50   | 50   | 50   | 50   | 50   | 50   | 50   | 50   | 50   | 50   |
| antibody+1 pep/ 28+  | 5300    | 97          | 219  | 245  | 254  | 274  | 313  | 298  | 302  | 303  | 341  | 334  | 322  | 323  |
| antibody+1 pep/ 27+  | 5497    | 621         | 1309 | 1401 | 1409 | 1611 | 1698 | 1798 | 1783 | 2003 | 1974 | 2016 | 1920 | 1902 |
| antibody+1 pep/ 26+  | 5708    | 1581        | 3249 | 3564 | 3604 | 3944 | 4115 | 4260 | 4404 | 4846 | 5019 | 5006 | 5090 | 4979 |
| antibody+1 pep/ 25+  | 5937    | 1683        | 3432 | 3747 | 3790 | 4052 | 4261 | 4474 | 4622 | 5016 | 5463 | 5508 | 5621 | 5576 |
| antibody+1 pep/ 24+  | 6185    | 916         | 1838 | 2047 | 2080 | 2253 | 2294 | 2368 | 2564 | 2881 | 3073 | 3268 | 3303 | 3386 |
| antibody+1 pep/ 23+  | 6459    | 264         | 505  | 563  | 635  | 651  | 680  | 724  | 835  | 915  | 1042 | 1110 | 1227 | 1170 |
| antibody+1 pep/ 22+  | 6747    | 50          | 50   | 50   | 50   | 50   | 50   | 50   | 50   | 50   | 50   | 50   | 50   | 50   |
| antibody+2 peps/ 29+ | 5178    | 50          | 50   | 50   | 50   | 50   | 50   | 50   | 50   | 50   | 50   | 50   | 50   | 50   |
| antibody+2 peps/ 28+ | 5364    | 41          | 85   | 81   | 94   | 116  | 101  | 111  | 110  | 113  | 117  | 114  | 129  | 102  |
| antibody+2 peps/ 27+ | 5555    | 193         | 398  | 451  | 420  | 473  | 469  | 516  | 514  | 543  | 527  | 550  | 507  | 539  |
| antibody+2 peps/ 26+ | 5778    | 424         | 850  | 885  | 866  | 952  | 1040 | 1013 | 1056 | 1098 | 1145 | 1096 | 1073 | 1087 |
| antibody+2 peps/ 25+ | 6009    | 417         | 737  | 802  | 833  | 877  | 929  | 944  | 956  | 992  | 1010 | 1004 | 1008 | 1006 |
| antibody+2 peps/ 24+ | 6256    | 181         | 343  | 368  | 402  | 403  | 444  | 451  | 515  | 520  | 547  | 546  | 546  | 544  |
| antibody+2 peps/ 23+ | 6530    | 42          | 94   | 106  | 113  | 108  | 123  | 132  | 139  | 153  | 183  | 193  | 195  | 189  |

|                             |      |      |      |      |      |      |      |      |      |      |      |      |      |      |
|-----------------------------|------|------|------|------|------|------|------|------|------|------|------|------|------|------|
| <b>antibody+2 peps/ 22+</b> | 6825 | 50   | 50   | 50   | 50   | 50   | 50   | 50   | 50   | 50   | 50   | 50   | 50   | 50   |
| <b>antibody fragment</b>    | 1000 | n.d. | 20   |
| <b>antibody fragment</b>    | 1200 | n.d. | 20   | 20   | 20   |
| <b>antibody fragment</b>    | 1324 | n.d. | 20   | 20   | 20   | 20   | 37   |
| <b>antibody fragment</b>    | 1471 | n.d. | 20   | 20   | 50   | 101  | 336  |
| <b>antibody fragment</b>    | 1554 | n.d. | 45   | 48   | n.d. | n.d. | n.d. |
| <b>antibody fragment</b>    | 1655 | n.d. | 272  | 679  |
| <b>antibody fragment</b>    | 1751 | n.d. | 90   | 128  | 136  | n.d. | n.d. |
| <b>antibody fragment</b>    | 1892 | n.d. | 403  |
| <b>antibody fragment</b>    | 1998 | n.d. | 142  | 195  | 246  | 281  |
| <b>antibody fragment</b>    | 2006 | n.d. | 58   | n.d. | n.d. | n.d. | n.d. |
| <b>antibody fragment</b>    | 2152 | n.d. | 20   | n.d. | n.d. | n.d. | n.d. |
| <b>antibody fragment</b>    | 2189 | n.d. | 20   | n.d. | n.d. | n.d. | 165  |
| <b>antibody fragment</b>    | 2331 | n.d. | 53   | n.d. | n.d. | 153  |
| <b>antibody fragment</b>    | 2508 | n.d. | 29   | 91   | 123  | 120  |
| <b>antibody fragment</b>    | 2819 | n.d. | 20   | 28   | 63   | 69   |
| <b>antibody fragment</b>    | 3336 | n.d. | 20   | 20   | 20   | 20   |
| <b>antibody fragment</b>    | 3461 | n.d. | 20   | 20   | 20   |

a) Imputed values necessary for optimized Gauss-fit are shown in red and are equal to the background intensity at the given m/z.

b) n.d.: value not determined / ion signal not present.



**Table S6.** Ion species, charge states, m/z values and intensities for anti-Troponin I antibody complexed with Troponin I peptide 4 at measured collision cell voltage differences. <sup>a,b)</sup>

peptide 4, measurement 1

| ion / charge state   | m/z     | $\Delta$ CV |      |      |      |      |       |      |      |      |      |      |
|----------------------|---------|-------------|------|------|------|------|-------|------|------|------|------|------|
|                      |         | 4           | 8    | 12   | 16   | 20   | 30    | 40   | 50   | 60   | 70   | 80   |
| peptide dimer / 1+   | 3541.90 | 2           | 2    | 5    | 5    | 5    | 10    | 10   | 10   | 10   | 10   | 10   |
| peptide 4 / 1+       | 1771.89 | 2           | 4    | 7    | 8    | 8    | 15    | 23   | 42   | 69   | 123  | 139  |
| peptide 4 / 2+       | 886.47  | 14          | 73   | 274  | 512  | 771  | 1049  | 1403 | 2237 | 3390 | 4339 | 4191 |
| peptide 4 / 3+       | 591.65  | 2           | 4    | 6    | 6    | 5    | 7     | 7    | 8    | 11   | 15   | 14   |
| peptide 4 / 4+       | 443.73  | 2           | 2    | 5    | 5    | 5    | 10    | 10   | 10   | 10   | 10   | 10   |
| antibody+0 pep / 28+ | 5233    | 20          | 20   | 20   | 20   | 20   | 20    | 20   | 20   | 20   | 20   | 20   |
| antibody+0 pep / 27+ | 5424    | 39          | 115  | 180  | 164  | 153  | 105,5 | 88   | 108  | 124  | 173  | 126  |
| antibody+0 pep / 26+ | 5631    | 229         | 679  | 1051 | 1146 | 997  | 750   | 681  | 769  | 908  | 1137 | 960  |
| antibody+0 pep / 25+ | 5861    | 575         | 1879 | 2695 | 2909 | 2691 | 2108  | 1949 | 2224 | 2661 | 3236 | 2878 |
| antibody+0 pep / 24+ | 6102    | 688         | 2318 | 3307 | 3649 | 3561 | 2684  | 2686 | 2940 | 3682 | 4286 | 3892 |
| antibody+0 pep / 23+ | 6372    | 414         | 1524 | 2068 | 2365 | 2363 | 1802  | 1974 | 2081 | 2550 | 3063 | 2914 |
| antibody+0 pep / 22+ | 6660    | 140         | 536  | 746  | 851  | 876  | 704   | 751  | 856  | 1042 | 1200 | 1246 |
| antibody+0 pep / 21+ | 6984    | 34          | 124  | 155  | 197  | 193  | 155   | 193  | 207  | 271  | 305  | 354  |
| antibody+0 pep / 20+ | 7326    | 20          | 20   | 20   | 20   | 20   | 20    | 20   | 20   | 20   | 20   | 20   |
| antibody+1 pep/ 28+  | 5296    | 20          | 20   | 20   | 20   | 20   | 20    | 20   | 20   | 20   | 20   | 20   |
| antibody+1 pep/ 27+  | 5491    | 35          | 102  | 165  | 171  | 152  | 110   | 84   | 112  | 112  | 138  | 109  |
| antibody+1 pep/ 26+  | 5700    | 187         | 631  | 957  | 983  | 890  | 707   | 535  | 646  | 679  | 830  | 711  |
| antibody+1 pep/ 25+  | 5931    | 422         | 1508 | 2171 | 2290 | 2144 | 1712  | 1500 | 1579 | 1793 | 2144 | 1886 |
| antibody+1 pep/ 24+  | 6178    | 478         | 1781 | 2581 | 2781 | 2647 | 2137  | 1898 | 2086 | 2360 | 2618 | 2577 |
| antibody+1 pep/ 23+  | 6448    | 261         | 1027 | 1429 | 1632 | 1640 | 1253  | 1231 | 1314 | 1462 | 1755 | 1677 |
| antibody+1 pep/ 22+  | 6744    | 93          | 333  | 474  | 544  | 560  | 450   | 459  | 484  | 587  | 663  | 694  |
| antibody+1 pep/ 21+  | 7064    | 17          | 67   | 93   | 119  | 122  | 101   | 113  | 116  | 144  | 167  | 188  |
| antibody+1 pep/ 20+  | 7414    | 20          | 20   | 20   | 20   | 20   | 20    | 20   | 20   | 20   | 20   | 20   |
| antibody+2 peps/ 28+ | 5358    | 10          | 20   | 20   | 20   | 20   | 20    | 20   | 20   | 20   | 20   | 20   |
| antibody+2 peps/ 27+ | 5557    | 13          | 41   | 66   | 66   | 56   | 47    | 42   | 44   | 42   | 54   | 44   |
| antibody+2 peps/ 26+ | 5772    | 44          | 170  | 226  | 230  | 213  | 188   | 122  | 145  | 151  | 164  | 145  |
| antibody+2 peps/ 25+ | 6000    | 93          | 353  | 489  | 539  | 496  | 424   | 327  | 338  | 344  | 386  | 356  |
| antibody+2 peps/ 24+ | 6248    | 102         | 398  | 574  | 620  | 630  | 503   | 406  | 413  | 432  | 492  | 447  |
| antibody+2 peps/ 23+ | 6522    | 54          | 207  | 288  | 338  | 340  | 266   | 248  | 271  | 260  | 278  | 270  |
| antibody+2 peps/ 22+ | 6823    | 18          | 68   | 90   | 111  | 113  | 93    | 87   | 88   | 115  | 116  | 116  |

|                             |      |      |      |      |      |      |      |      |      |      |      |      |
|-----------------------------|------|------|------|------|------|------|------|------|------|------|------|------|
| <b>antibody+2 peps/ 21+</b> | 7142 | 7    | 16   | 24   | 25   | 25   | 25   | 26   | 27   | 41   | 43   | 54   |
| <b>antibody+2 peps/ 20+</b> | 7501 | 10   | 20   | 20   | 20   | 20   | 20   | 20   | 20   | 20   | 20   | 20   |
| <b>antibody fragment</b>    | 1000 | n.d. | 10   |
| <b>antibody fragment</b>    | 1204 | n.d. | 10   | 10   | 10   |
| <b>antibody fragment</b>    | 1324 | n.d. | 10   | 10   | 17   |
| <b>antibody fragment</b>    | 1471 | n.d. | 73   | 186  |
| <b>antibody fragment</b>    | 1554 | n.d. | 14   | n.d. | n.d. |
| <b>antibody fragment</b>    | 1655 | n.d. | 181  | 395  |
| <b>antibody fragment</b>    | 1751 | n.d. | 55   | n.d. | n.d. |
| <b>antibody fragment</b>    | 1998 | n.d. | 66   | 192  | 233  |
| <b>antibody fragment</b>    | 2189 | n.d. | 64   | n.d. |
| <b>antibody fragment</b>    | 2331 | n.d. | 13   | 56   | 113  |
| <b>antibody fragment</b>    | 2508 | n.d. | 24   |
| <b>antibody fragment</b>    | 2819 | n.d. | 10   | 10   | 10   |
| <b>antibody fragment</b>    | 3336 | n.d. | 10   | 10   | 10   |

a) Imputed values necessary for optimized Gauss-fit are shown in red and are equal to the background intensity at the given m/z.

b) n.d.: value not determined / ion signal not present.

Table S6. continued

peptide 4, measurement 2

| ion / charge state   | m/z     | $\Delta CV$ |      |      |      |      |      |      |      |       |      |      |       |      |
|----------------------|---------|-------------|------|------|------|------|------|------|------|-------|------|------|-------|------|
|                      |         | 2           | 4    | 6    | 8    | 12   | 16   | 20   | 30   | 40    | 50   | 60   | 70    | 80   |
| peptide dimer / 1+   | 3541.90 | 5           | 5    | 5    | 10   | 10   | 10   | 10   | 10   | 10    | 10   | 10   | 10    | 10   |
| peptide 4 / 1+       | 1771.89 | 5           | 8    | 6    | 13   | 11   | 21   | 25   | 81   | 150   | 171  | 229  | 380   | 373  |
| peptide 4 / 2+       | 886.47  | 47          | 119  | 344  | 461  | 869  | 1224 | 1673 | 3246 | 5051  | 4432 | 4853 | 6434  | 5407 |
| peptide 4 / 3+       | 591.65  | 3           | 4    | 5    | 7    | 5    | 6    | 9    | 9    | 12    | 7    | 12   | 12    | 7    |
| peptide 4 / 4+       | 443.73  | 5           | 5    | 5    | 5    | 10   | 10   | 10   | 10   | 10    | 10   | 10   | 10    | 10   |
| antibody+0 pep / 28+ | 5226    | 50          | 50   | 50   | 50   | 50   | 50   | 50   | 50   | 50    | 50   | 50   | 50    | 50   |
| antibody+0 pep / 27+ | 5418    | 436         | 676  | 1395 | 1467 | 1478 | 1349 | 1240 | 1647 | 1898  | 1122 | 1247 | 1810  | 1310 |
| antibody+0 pep / 26+ | 5628    | 2170        | 3177 | 5486 | 5741 | 5461 | 5097 | 4941 | 6298 | 7239  | 4685 | 5168 | 7059  | 5432 |
| antibody+0 pep / 25+ | 5851    | 4016        | 5655 | 8707 | 8696 | 8594 | 7984 | 7973 | 9810 | 10794 | 8099 | 8887 | 11322 | 9130 |
| antibody+0 pep / 24+ | 6095    | 3360        | 4622 | 6669 | 6735 | 6614 | 6347 | 6138 | 7767 | 8497  | 6909 | 7655 | 9273  | 7894 |
| antibody+0 pep / 23+ | 6364    | 1492        | 2087 | 2815 | 2837 | 2909 | 2727 | 2770 | 3633 | 4026  | 3598 | 3897 | 4640  | 4214 |
| antibody+0 pep / 22+ | 6654    | 367         | 544  | 708  | 722  | 744  | 737  | 787  | 1049 | 1233  | 1220 | 1318 | 1615  | 1465 |
| antibody+0 pep / 21+ | 6968    | 50          | 50   | 50   | 50   | 50   | 50   | 50   | 50   | 50    | 50   | 50   | 50    | 50   |
| antibody+1 pep/ 28+  | 5290    | 50          | 50   | 50   | 50   | 50   | 50   | 50   | 50   | 50    | 50   | 50   | 50    | 50   |
| antibody+1 pep/ 27+  | 5483    | 410         | 578  | 1145 | 1142 | 1077 | 1046 | 1069 | 1278 | 1425  | 910  | 1023 | 1285  | 949  |
| antibody+1 pep/ 26+  | 5699    | 1677        | 2420 | 3779 | 3894 | 3797 | 3546 | 3622 | 4253 | 4774  | 3328 | 3509 | 4354  | 3504 |
| antibody+1 pep/ 25+  | 5921    | 2684        | 3793 | 5324 | 5418 | 5163 | 4860 | 4947 | 5936 | 6230  | 4860 | 5134 | 6313  | 5213 |
| antibody+1 pep/ 24+  | 6173    | 2121        | 2851 | 3926 | 3814 | 3723 | 3550 | 3603 | 4274 | 4643  | 3838 | 4094 | 4936  | 4170 |
| antibody+1 pep/ 23+  | 6442    | 851         | 1117 | 1522 | 1548 | 1506 | 1445 | 1474 | 1714 | 1930  | 1787 | 1937 | 2247  | 2100 |
| antibody+1 pep/ 22+  | 6730    | 196         | 282  | 388  | 366  | 359  | 402  | 405  | 468  | 584   | 595  | 638  | 807   | 728  |
| antibody+1 pep/ 21+  | 7052    | 50          | 50   | 50   | 50   | 50   | 50   | 50   | 50   | 50    | 50   | 50   | 50    | 50   |
| antibody+2 peps/ 28+ | 5353    | 50          | 50   | 50   | 50   | 50   | 50   | 50   | 50   | 50    | 50   | 50   | 50    | 50   |
| antibody+2 peps/ 27+ | 5555    | 116         | 166  | 271  | 280  | 258  | 241  | 283  | 301  | 340   | 245  | 265  | 309   | 263  |
| antibody+2 peps/ 26+ | 5762    | 354         | 489  | 715  | 681  | 676  | 641  | 688  | 748  | 824   | 647  | 677  | 744   | 612  |
| antibody+2 peps/ 25+ | 5997    | 533         | 703  | 962  | 919  | 892  | 850  | 924  | 968  | 1058  | 843  | 885  | 995   | 854  |
| antibody+2 peps/ 24+ | 6246    | 379         | 528  | 714  | 685  | 624  | 613  | 675  | 726  | 795   | 642  | 668  | 728   | 682  |
| antibody+2 peps/ 23+ | 6515    | 141         | 193  | 267  | 241  | 257  | 255  | 257  | 279  | 310   | 289  | 279  | 350   | 322  |
| antibody+2 peps/ 22+ | 6808    | 34          | 54   | 66   | 68   | 68   | 68   | 75   | 91   | 118   | 118  | 129  | 158   | 141  |
| antibody+2 peps/ 21+ | 7137    | 50          | 50   | 50   | 50   | 50   | 50   | 50   | 50   | 50    | 50   | 50   | 50    | 50   |

|                   |      |      |      |      |      |      |      |      |      |      |      |      |      |      |
|-------------------|------|------|------|------|------|------|------|------|------|------|------|------|------|------|
| antibody fragment | 1000 | n.d. | 20   | 20   | 20   | 20   | 20   | 20   |
| antibody fragment | 1200 | n.d. | 20   | 20   | 20   | 20   | 20   | 20   |
| antibody fragment | 1324 | n.d. | 20   | 20   | 20   | 20   | 20   | 20   |
| antibody fragment | 1471 | n.d. | 17   | 41   | 103  | 201  |
| antibody fragment | 1554 | n.d. | 31   | 43   | n.d. | n.d. | n.d. | n.d. |
| antibody fragment | 1655 | n.d. | 37   | 75   | 290  | n.d. |
| antibody fragment | 1751 | n.d. | 49   | 110  | 91   | 95   | n.d. | n.d. |
| antibody fragment | 1892 | n.d. | 441  |
| antibody fragment | 1998 | n.d. | 40   | n.d. | 153  | 225  | n.d. | n.d. |
| antibody fragment | 2006 | n.d. | 104  | n.d. | n.d. | n.d. | n.d. |
| antibody fragment | 2189 | n.d. | 20   | n.d. | n.d. | n.d. | n.d. | n.d. |
| antibody fragment | 2331 | n.d. | 20   | 62   | 96   | n.d. | n.d. | n.d. |
| antibody fragment | 2392 | n.d. | 20   | n.d. | n.d. | n.d. | n.d. | n.d. |
| antibody fragment | 2508 | n.d. | 50   | n.d. | 284  | 535  | 484  |
| antibody fragment | 2592 | n.d. | 20   | 20   | n.d. | n.d. | n.d. |
| antibody fragment | 2648 | n.d. | 20   | 20   | n.d. | n.d. | n.d. |
| antibody fragment | 2819 | n.d. | 64   | 88   | 144  | 485  | n.d. |
| antibody fragment | 2985 | n.d. | 20   | 20   | 20   | 20   | 20   | 20   | 20   | n.d. | n.d. | 20   | 20   | 20   |
| antibody fragment | 3222 | n.d. | 20   | 20   | 20   | 20   | 20   | 20   | 20   | n.d. | n.d. | 20   | 20   | 20   |
| antibody fragment | 3336 | n.d. | 24   | 81   | 166  | 192  | 202  | 250  | 315  | 297  | 246  | 225  | 204  | 168  |
| antibody fragment | 3590 | n.d. | 38   | 237  | 452  | 489  | 464  | 525  | 662  | 679  | 622  | 580  | 646  | 507  |
| antibody fragment | 3886 | n.d. | 35   | 123  | 156  | 175  | 154  | 202  | 206  | 221  | 220  | 213  | 259  | 259  |
| antibody fragment | 4000 | n.d. | 20   | 20   | 20   | 20   | 20   | 20   | 20   | 20   | 20   | 20   | 20   | 20   |
| antibody fragment | 4200 | n.d. | 20   | 20   | 20   | 20   | 20   | 20   | 20   | 20   | 20   | 20   | 20   | 20   |

a) Imputed values necessary for optimized Gauss-fit are shown in red and are equal to the background intensity at the given m/z.

b) n.d.: value not determined / ion signal not present.

Table S6. continued

peptide 4, measurement 3

| ion / charge state   | m/z     | $\Delta$ CV |      |      |      |      |      |      |      |      |      |      |      |      |
|----------------------|---------|-------------|------|------|------|------|------|------|------|------|------|------|------|------|
|                      |         | 2           | 4    | 6    | 8    | 12   | 16   | 20   | 30   | 40   | 50   | 60   | 70   | 80   |
| peptide dimer / 1+   | 3541.90 | 5           | 5    | 5    | 5    | 10   | 10   | 10   | 10   | 10   | 10   | 10   | 10   | 10   |
| peptide 4 / 1+       | 1771.89 | 5           | 7    | 9    | 7    | 9    | 19   | 25   | 31   | 138  | 200  | 265  | 353  | 442  |
| peptide 4 / 2+       | 886.47  | 43          | 104  | 206  | 351  | 686  | 1244 | 1716 | 1926 | 4558 | 5464 | 5629 | 5844 | 5629 |
| peptide 4 / 3+       | 591.65  | 3           | 3    | 3    | 3    | 3    | 5    | 6    | 6    | 7    | 9    | 7    | 9    | 7    |
| peptide 4 / 4+       | 443.73  | 5           | 5    | 5    | 5    | 10   | 10   | 10   | 10   | 10   | 10   | 10   | 10   | 10   |
| antibody+0 pep / 28+ | 5226    | 50          | 50   | 50   | 50   | 50   | 50   | 50   | 50   | 50   | 50   | 50   | 50   | 50   |
| antibody+0 pep / 27+ | 5418    | 342         | 568  | 875  | 987  | 1051 | 1311 | 1272 | 1201 | 1612 | 1720 | 1602 | 1666 | 1579 |
| antibody+0 pep / 26+ | 5628    | 1783        | 2597 | 3344 | 3712 | 4007 | 4827 | 4633 | 4590 | 5719 | 6236 | 6056 | 6185 | 6034 |
| antibody+0 pep / 25+ | 5851    | 3190        | 4278 | 5493 | 5749 | 6319 | 7271 | 7397 | 7160 | 8888 | 9536 | 9443 | 9634 | 9325 |
| antibody+0 pep / 24+ | 6095    | 2649        | 3497 | 4320 | 4429 | 4933 | 5552 | 5877 | 5662 | 7166 | 8005 | 7891 | 7885 | 7678 |
| antibody+0 pep / 23+ | 6364    | 1262        | 1633 | 1898 | 2005 | 2308 | 2510 | 2724 | 2574 | 3632 | 4025 | 4099 | 4062 | 4172 |
| antibody+0 pep / 22+ | 6654    | 327         | 455  | 538  | 550  | 610  | 677  | 815  | 773  | 1177 | 1300 | 1472 | 1418 | 1401 |
| antibody+0 pep / 21+ | 6968    | 50          | 50   | 50   | 50   | 50   | 50   | 50   | 50   | 50   | 50   | 50   | 50   | 50   |
| antibody+1 pep/ 28+  | 5290    | 50          | 50   | 50   | 50   | 50   | 50   | 50   | 50   | 50   | 50   | 50   | 50   | 50   |
| antibody+1 pep/ 27+  | 5483    | 332         | 510  | 695  | 802  | 917  | 1056 | 979  | 983  | 1205 | 1287 | 1164 | 1189 | 1111 |
| antibody+1 pep/ 26+  | 5699    | 1436        | 2035 | 2532 | 2873 | 3068 | 3551 | 3432 | 3337 | 3883 | 4156 | 3948 | 3939 | 3765 |
| antibody+1 pep/ 25+  | 5921    | 2226        | 2971 | 3704 | 3887 | 4230 | 4816 | 4794 | 4632 | 5500 | 5744 | 5582 | 5638 | 5444 |
| antibody+1 pep/ 24+  | 6173    | 1862        | 2330 | 2751 | 2890 | 3118 | 3415 | 3517 | 3405 | 4133 | 4351 | 4449 | 4476 | 4270 |
| antibody+1 pep/ 23+  | 6442    | 743         | 900  | 1143 | 1223 | 1291 | 1379 | 1514 | 1436 | 1897 | 1998 | 2123 | 2033 | 1991 |
| antibody+1 pep/ 22+  | 6730    | 183         | 239  | 309  | 306  | 338  | 366  | 427  | 380  | 592  | 679  | 725  | 672  | 731  |
| antibody+1 pep/ 21+  | 7052    | 50          | 50   | 50   | 50   | 50   | 50   | 50   | 50   | 50   | 50   | 50   | 50   | 50   |
| antibody+2 peps/ 28+ | 5353    | 50          | 50   | 50   | 50   | 50   | 50   | 50   | 50   | 50   | 50   | 50   | 50   | 50   |
| antibody+2 peps/ 27+ | 5555    | 97          | 133  | 198  | 216  | 212  | 257  | 245  | 262  | 269  | 303  | 292  | 300  | 269  |
| antibody+2 peps/ 26+ | 5762    | 314         | 430  | 510  | 591  | 603  | 660  | 671  | 632  | 708  | 744  | 677  | 712  | 664  |
| antibody+2 peps/ 25+ | 5997    | 448         | 617  | 718  | 767  | 847  | 898  | 909  | 835  | 956  | 1010 | 949  | 926  | 913  |
| antibody+2 peps/ 24+ | 6246    | 347         | 430  | 510  | 566  | 561  | 626  | 671  | 615  | 717  | 712  | 700  | 669  | 687  |
| antibody+2 peps/ 23+ | 6515    | 132         | 165  | 201  | 207  | 228  | 249  | 278  | 249  | 299  | 325  | 338  | 306  | 307  |
| antibody+2 peps/ 22+ | 6808    | 34          | 41   | 49   | 54   | 61   | 68   | 76   | 76   | 115  | 136  | 129  | 132  | 134  |
| antibody+2 peps/ 21+ | 7137    | 50          | 50   | 50   | 50   | 50   | 50   | 50   | 50   | 50   | 50   | 50   | 50   | 50   |

|                   |      |      |      |      |      |      |      |      |      |      |      |      |      |      |
|-------------------|------|------|------|------|------|------|------|------|------|------|------|------|------|------|
| antibody fragment | 1000 | n.d. | 20   | 20   | 20   | 20   | 20   |
| antibody fragment | 1200 | n.d. | 20   | 20   | 20   | 20   | 20   |
| antibody fragment | 1324 | n.d. | 36   |
| antibody fragment | 1471 | n.d. | 53   | 94   | 275  |
| antibody fragment | 1554 | n.d. | 27   | 27   | n.d. | n.d. | n.d. |
| antibody fragment | 1655 | n.d. | 54   | 128  | 224  | 626  |
| antibody fragment | 1751 | n.d. | 113  | 90   | n.d. | n.d. | n.d. |
| antibody fragment | 1892 | n.d. | 487  |
| antibody fragment | 1998 | n.d. | 89   | 169  | 225  | 231  | 244  |
| antibody fragment | 2189 | n.d. | 123  | 177  | n.d. |
| antibody fragment | 2331 | n.d. | 37   | 82   | 100  | 183  | n.d. |
| antibody fragment | 2592 | n.d. | 20   | 20   | 20   | 20   | 20   |
| antibody fragment | 2648 | n.d. | 20   | 20   | 20   | 20   | 20   |
| antibody fragment | 2819 | n.d. | 46   | 75   | n.d. | n.d. | n.d. |
| antibody fragment | 2985 | n.d. | 20   | 20   | 20   | 20   | 20   | 20   | 20   | n.d. | n.d. | n.d. | n.d. | n.d. |
| antibody fragment | 3222 | n.d. | 20   | 20   | 20   | 20   | 20   | 20   | 20   | n.d. | n.d. | n.d. | n.d. | n.d. |
| antibody fragment | 3336 | n.d. | 18   | 78   | 132  | 137  | 223  | 279  | 283  | 294  | 267  | 232  | 190  | 189  |
| antibody fragment | 3590 | n.d. | 44   | 227  | 401  | 419  | 462  | 564  | 564  | 671  | 704  | 697  | 607  | 517  |
| antibody fragment | 3886 | n.d. | 33   | 108  | 137  | 140  | 162  | 172  | 181  | 216  | 240  | 255  | 249  | 281  |
| antibody fragment | 4000 | n.d. | 20   | 20   | 20   | 20   | 20   | 20   | 20   | 20   | 20   | 20   | 20   | 20   |
| antibody fragment | 4200 | n.d. | 20   | 20   | 20   | 20   | 20   | 20   | 20   | 20   | 20   | 20   | 20   | 20   |

a) Imputed values necessary for optimized Gauss-fit are shown in red and are equal to the background intensity at the given m/z.

b) n.d.: value not determined / ion signal not present.

Table S6. continued

peptide 4, measurement 4

| ion / charge state   | m/z     | $\Delta CV$ |      |      |      |      |      |      |      |       |       |       |       |       |
|----------------------|---------|-------------|------|------|------|------|------|------|------|-------|-------|-------|-------|-------|
|                      |         | 2           | 4    | 6    | 8    | 12   | 16   | 20   | 30   | 40    | 50    | 60    | 70    | 80    |
| peptide dimer / 1+   | 3541.90 | 2           | 3    | 5    | 5    | 5    | 5    | 5    | 10   | 10    | 10    | 10    | 10    | 10    |
| peptide 4 / 1+       | 1771.89 | 3           | 3    | 6    | 7    | 8    | 10   | 12   | 35   | 73    | 143   | 209   | 230   | 281   |
| peptide 4 / 2+       | 886.47  | 11          | 28   | 57   | 78   | 247  | 496  | 738  | 2309 | 4426  | 6054  | 6553  | 6740  | 7153  |
| peptide 4 / 3+       | 591.65  | 2           | 4    | 4    | 5    | 5    | 7    | 8    | 15   | 20    | 26    | 32    | 28    | 34    |
| peptide 4 / 4+       | 443.73  | 2           | 3    | 5    | 5    | 5    | 5    | 5    | 10   | 10    | 10    | 10    | 10    | 10    |
| antibody+0 pep / 29+ | 5050    | 50          | 50   | 50   | 50   | 50   | 50   | 50   | 50   | 50    | 50    | 50    | 50    | 50    |
| antibody+0 pep / 28+ | 5230    | 82          | 114  | 208  | 253  | 291  | 344  | 376  | 611  | 940   | 1125  | 1161  | 1172  | 1385  |
| antibody+0 pep / 27+ | 5424    | 507         | 726  | 1257 | 1549 | 1770 | 2246 | 2318 | 3562 | 5382  | 6152  | 6397  | 6508  | 7402  |
| antibody+0 pep / 26+ | 5631    | 1257        | 1924 | 2930 | 3670 | 4408 | 5637 | 6085 | 8857 | 12636 | 14361 | 14940 | 15162 | 16834 |
| antibody+0 pep / 25+ | 5857    | 1446        | 2222 | 3188 | 4167 | 4971 | 6444 | 6969 | 9993 | 13686 | 15557 | 16407 | 16550 | 17684 |
| antibody+0 pep / 24+ | 6103    | 802         | 1248 | 1811 | 2385 | 2963 | 3860 | 4216 | 5722 | 7815  | 8839  | 9404  | 9419  | 9836  |
| antibody+0 pep / 23+ | 6368    | 261         | 403  | 606  | 791  | 997  | 1342 | 1487 | 1984 | 2667  | 3037  | 3290  | 3377  | 3498  |
| antibody+0 pep / 22+ | 6656    | 51          | 67   | 98   | 132  | 168  | 235  | 246  | 371  | 491   | 600   | 706   | 756   | 802   |
| antibody+0 pep / 21+ | 6973    | 50          | 50   | 50   | 50   | 50   | 50   | 50   | 50   | 50    | 50    | 50    | 50    | 50    |
| antibody+1 pep/ 29+  | 5110    | 20          | 50   | 50   | 50   | 50   | 50   | 50   | 50   | 50    | 50    | 50    | 50    | 50    |
| antibody+1 pep/ 28+  | 5294    | 75          | 103  | 160  | 172  | 214  | 248  | 257  | 340  | 498   | 547   | 544   | 546   | 595   |
| antibody+1 pep/ 27+  | 5486    | 300         | 451  | 705  | 847  | 974  | 1186 | 1233 | 1747 | 2375  | 2654  | 2602  | 2555  | 2759  |
| antibody+1 pep/ 26+  | 5701    | 664         | 998  | 1476 | 1817 | 2083 | 2575 | 2790 | 3749 | 4980  | 5406  | 5521  | 5459  | 5743  |
| antibody+1 pep/ 25+  | 5928    | 641         | 1029 | 1414 | 1747 | 2072 | 2545 | 2758 | 3670 | 4612  | 4995  | 5111  | 5075  | 5293  |
| antibody+1 pep/ 24+  | 6175    | 326         | 520  | 726  | 994  | 1091 | 1389 | 1510 | 1865 | 2466  | 2545  | 2593  | 2546  | 2701  |
| antibody+1 pep/ 23+  | 6443    | 101         | 152  | 203  | 277  | 309  | 395  | 470  | 573  | 752   | 799   | 860   | 925   | 932   |
| antibody+1 pep/ 22+  | 6737    | 26          | 27   | 34   | 48   | 51   | 67   | 85   | 117  | 179   | 204   | 268   | 292   | 314   |
| antibody+1 pep/ 21+  | 7057    | 20          | 50   | 50   | 50   | 50   | 50   | 50   | 50   | 50    | 50    | 50    | 50    | 50    |
| antibody+2 peps/ 29+ | 5170    | 10          | 20   | 20   | 20   | 20   | 20   | 20   | 50   | 50    | 50    | 50    | 50    | 50    |
| antibody+2 peps/ 28+ | 5355    | 27          | 43   | 54   | 61   | 59   | 64   | 71   | 79   | 126   | 133   | 122   | 123   | 124   |
| antibody+2 peps/ 27+ | 5555    | 78          | 110  | 154  | 182  | 203  | 226  | 226  | 286  | 383   | 407   | 388   | 399   | 395   |
| antibody+2 peps/ 26+ | 5767    | 129         | 222  | 288  | 344  | 369  | 457  | 476  | 558  | 694   | 705   | 655   | 626   | 678   |
| antibody+2 peps/ 25+ | 5997    | 127         | 191  | 290  | 325  | 353  | 417  | 431  | 517  | 616   | 620   | 600   | 591   | 577   |
| antibody+2 peps/ 24+ | 6245    | 71          | 135  | 150  | 193  | 208  | 246  | 247  | 308  | 332   | 370   | 356   | 316   | 326   |
| antibody+2 peps/ 23+ | 6519    | 20          | 35   | 55   | 57   | 73   | 77   | 90   | 124  | 162   | 162   | 167   | 168   | 164   |
| antibody+2 peps/ 22+ | 6815    | 8           | 16   | 14   | 14   | 21   | 27   | 33   | 49   | 59    | 84    | 90    | 106   | 101   |

|                             |      |      |      |      |      |      |      |      |      |      |      |      |      |      |      |
|-----------------------------|------|------|------|------|------|------|------|------|------|------|------|------|------|------|------|
| <b>antibody+2 peps/ 21+</b> | 7139 | 10   | 20   | 20   | 20   | 20   | 20   | 20   | 20   | 50   | 50   | 50   | 50   | 50   | 50   |
| <b>antibody fragment</b>    | 1000 | n.d. | 20   |
| <b>antibody fragment</b>    | 1200 | n.d. | 20   | 20   | 20   |
| <b>antibody fragment</b>    | 1324 | n.d. | 20   | 20   | 20   | 20   | 97   |
| <b>antibody fragment</b>    | 1471 | n.d. | 20   | 20   | 101  | 252  | 804  |
| <b>antibody fragment</b>    | 1554 | n.d. | 59   | 95   | n.d. | n.d. | n.d. |
| <b>antibody fragment</b>    | 1655 | n.d. | 439  | 1449 |
| <b>antibody fragment</b>    | 1751 | n.d. | 108  | 169  | 220  | n.d. | n.d. |
| <b>antibody fragment</b>    | 1998 | n.d. | 133  | 308  | 500  | 771  | 780  |
| <b>antibody fragment</b>    | 2189 | n.d. | 64   | 177  | 369  | 486  | 643  |
| <b>antibody fragment</b>    | 2331 | n.d. | 131  | n.d. | n.d. |
| <b>antibody fragment</b>    | 2392 | n.d. | 30   | 82   | n.d. | 218  | n.d. |
| <b>antibody fragment</b>    | 2508 | n.d. | 20   | 55   | 64   | 121  | 149  |
| <b>antibody fragment</b>    | 2592 | n.d. | 20   | 20   | 20   | n.d. | n.d. |
| <b>antibody fragment</b>    | 2648 | n.d. | 20   | 20   | n.d. | n.d. |
| <b>antibody fragment</b>    | 2819 | n.d. | 76   | 87   |
| <b>antibody fragment</b>    | 2985 | n.d. | 20   | 20   |
| <b>antibody fragment</b>    | 3222 | n.d. | 20   | 20   |

a) Imputed values necessary for optimized Gauss-fit are shown in red and are equal to the background intensity at the given m/z.

b) n.d.: value not determined / ion signal not present.



Table S6. continued

peptide 4, measurement 5

| ion / charge state   | m/z     | $\Delta CV$ |      |       |       |       |       |       |       |       |       |       |       |       |
|----------------------|---------|-------------|------|-------|-------|-------|-------|-------|-------|-------|-------|-------|-------|-------|
|                      |         | 2           | 4    | 6     | 8     | 12    | 16    | 20    | 30    | 40    | 50    | 60    | 70    | 80    |
| peptide dimer / 1+   | 3541.90 | 5           | 5    | 5     | 5     | 10    | 10    | 10    | 10    | 10    | 10    | 10    | 10    | 10    |
| peptide 4 / 1+       | 1771.89 | 8           | 10   | 14    | 18    | 19    | 21    | 28    | 75    | 134   | 232   | 350   | 395   | 471   |
| peptide 4 / 2+       | 886.47  | 81          | 247  | 558   | 799   | 1701  | 2985  | 4266  | 7815  | 10853 | 14127 | 14777 | 14247 | 14950 |
| peptide 4 / 3+       | 591.65  | 4           | 5    | 6     | 10    | 14    | 12    | 24    | 29    | 42    | 68    | 61    | 53    | 53    |
| peptide 4 / 4+       | 443.73  | 5           | 5    | 5     | 5     | 10    | 10    | 10    | 10    | 10    | 10    | 10    | 10    | 10    |
| antibody+0 pep / 29+ | 5050    | 50          | 50   | 50    | 50    | 50    | 50    | 50    | 50    | 50    | 50    | 50    | 50    | 50    |
| antibody+0 pep / 28+ | 5230    | 417         | 813  | 1168  | 1445  | 2162  | 2934  | 3420  | 3998  | 4555  | 5050  | 4948  | 4751  | 4629  |
| antibody+0 pep / 27+ | 5424    | 2400        | 4332 | 6040  | 6994  | 9394  | 11765 | 12993 | 15148 | 17003 | 18373 | 18245 | 17878 | 17806 |
| antibody+0 pep / 26+ | 5631    | 5354        | 9386 | 12572 | 14143 | 17404 | 20462 | 22001 | 24892 | 27777 | 30107 | 30001 | 29598 | 29543 |
| antibody+0 pep / 25+ | 5857    | 5318        | 8686 | 11170 | 12652 | 14169 | 16255 | 16969 | 18990 | 20993 | 22614 | 23174 | 22611 | 22651 |
| antibody+0 pep / 24+ | 6103    | 2633        | 4035 | 5089  | 5725  | 5981  | 6810  | 6976  | 7805  | 8733  | 9285  | 9526  | 9675  | 9689  |
| antibody+0 pep / 23+ | 6368    | 782         | 1116 | 1347  | 1574  | 1539  | 1723  | 1817  | 2116  | 2439  | 2764  | 2801  | 2891  | 2935  |
| antibody+0 pep / 22+ | 6656    | 104         | 145  | 169   | 201   | 205   | 234   | 269   | 359   | 483   | 567   | 668   | 707   | 724   |
| antibody+0 pep / 21+ | 6973    | 50          | 50   | 50    | 50    | 50    | 50    | 50    | 50    | 50    | 50    | 50    | 50    | 50    |
| antibody+1 pep/ 29+  | 5110    | 20          | 50   | 50    | 50    | 50    | 50    | 50    | 50    | 50    | 50    | 50    | 50    | 50    |
| antibody+1 pep/ 28+  | 5294    | 234         | 448  | 637   | 737   | 1083  | 1277  | 1479  | 1684  | 1697  | 1768  | 1729  | 1647  | 1582  |
| antibody+1 pep/ 27+  | 5486    | 1114        | 2072 | 2766  | 3157  | 3968  | 4733  | 5058  | 5511  | 5738  | 5961  | 5701  | 5474  | 5321  |
| antibody+1 pep/ 26+  | 5701    | 2349        | 3887 | 5042  | 5670  | 6587  | 7469  | 7834  | 8183  | 8714  | 9131  | 8761  | 8180  | 8256  |
| antibody+1 pep/ 25+  | 5928    | 1926        | 3118 | 3996  | 4455  | 4878  | 5298  | 5422  | 5778  | 5972  | 6232  | 6152  | 5946  | 5929  |
| antibody+1 pep/ 24+  | 6175    | 883         | 1330 | 1672  | 1833  | 1904  | 2060  | 2074  | 2208  | 2328  | 2524  | 2490  | 2493  | 2503  |
| antibody+1 pep/ 23+  | 6443    | 236         | 324  | 410   | 404   | 471   | 480   | 498   | 570   | 641   | 763   | 810   | 810   | 885   |
| antibody+1 pep/ 22+  | 6737    | 36          | 53   | 55    | 55    | 65    | 76    | 90    | 141   | 195   | 266   | 329   | 346   | 416   |
| antibody+1 pep/ 21+  | 7057    | 20          | 50   | 50    | 50    | 50    | 50    | 50    | 50    | 50    | 50    | 50    | 50    | 50    |
| antibody+2 peps/ 29+ | 5170    | 10          | 10   | 20    | 20    | 20    | 20    | 20    | 50    | 50    | 50    | 50    | 50    | 50    |
| antibody+2 peps/ 28+ | 5355    | 50          | 110  | 129   | 172   | 245   | 323   | 312   | 323   | 351   | 341   | 332   | 279   | 315   |
| antibody+2 peps/ 27+ | 5555    | 202         | 342  | 438   | 469   | 622   | 723   | 737   | 783   | 755   | 799   | 760   | 675   | 692   |
| antibody+2 peps/ 26+ | 5767    | 321         | 568  | 713   | 779   | 915   | 983   | 1012  | 1096  | 1021  | 1111  | 1052  | 945   | 952   |
| antibody+2 peps/ 25+ | 5997    | 284         | 410  | 504   | 590   | 625   | 694   | 746   | 781   | 770   | 802   | 780   | 665   | 700   |
| antibody+2 peps/ 24+ | 6245    | 124         | 186  | 214   | 287   | 255   | 321   | 355   | 383   | 389   | 452   | 404   | 344   | 377   |
| antibody+2 peps/ 23+ | 6519    | 44          | 61   | 62    | 67    | 77    | 99    | 107   | 149   | 154   | 215   | 207   | 190   | 208   |
| antibody+2 peps/ 22+ | 6815    | 11          | 16   | 23    | 24    | 27    | 35    | 40    | 67    | 85    | 105   | 161   | 125   | 124   |

|                             |      |      |      |      |      |      |      |      |      |      |      |      |      |      |
|-----------------------------|------|------|------|------|------|------|------|------|------|------|------|------|------|------|
| <b>antibody+2 peps/ 21+</b> | 7139 | 10   | 10   | 20   | 20   | 20   | 20   | 20   | 50   | 50   | 50   | 50   | 50   | 50   |
| <b>antibody fragment</b>    | 1000 | n.d. | 20   | 20   | 20   |
| <b>antibody fragment</b>    | 1200 | n.d. | 20   | 20   | 20   |
| <b>antibody fragment</b>    | 1324 | n.d. | 20   | 20   | 20   | 42   | 104  | 224  |
| <b>antibody fragment</b>    | 1471 | n.d. | 20   | 20   | 20   | 210  | 623  | 1656 |
| <b>antibody fragment</b>    | 1554 | n.d. | 68   | 101  | n.d. | n.d. | n.d. | n.d. |
| <b>antibody fragment</b>    | 1655 | n.d. | 154  | 396  | 1208 | 2774 |
| <b>antibody fragment</b>    | 1751 | n.d. | 126  | 323  | 413  | n.d. | n.d. | n.d. |
| <b>antibody fragment</b>    | 1851 | n.d. | 1891 |
| <b>antibody fragment</b>    | 1998 | n.d. | 84   | 270  | 485  | 658  | 778  | 786  |
| <b>antibody fragment</b>    | 2006 | n.d. | 20   | n.d. | n.d. | n.d. | n.d. | n.d. |
| <b>antibody fragment</b>    | 2069 | n.d. | 20   | n.d. | n.d. | n.d. | n.d. | n.d. |
| <b>antibody fragment</b>    | 2331 | n.d. | 92   | 199  | 324  | 375  | 480  |
| <b>antibody fragment</b>    | 2392 | n.d. |
| <b>antibody fragment</b>    | 2508 | n.d. | 49   | 89   | 161  | 203  | 249  |
| <b>antibody fragment</b>    | 2592 | n.d. | 20   | 20   | n.d. | n.d. | n.d. |
| <b>antibody fragment</b>    | 2648 | n.d. | 20   | 20   | n.d. | n.d. | n.d. |
| <b>antibody fragment</b>    | 2819 | n.d. | 70   | 128  | n.d. |
| <b>antibody fragment</b>    | 2985 | n.d. | 20   | 20   | 20   |
| <b>antibody fragment</b>    | 3222 | n.d. | 20   | 20   | 20   |

a) Imputed values necessary for optimized Gauss-fit are shown in red and are equal to the background intensity at the given m/z.

b) n.d.: value not determined / ion signal not present.

**Table S7.** Ion species, charge states, m/z values and intensities for anti-Troponin I antibody complexed with Troponin I peptide 5 at measured collision cell voltage differences. <sup>a,b)</sup>

peptide 5, measurement 1

| ion / charge state   | m/z     | $\Delta CV$ |      |      |      |      |      |      |      |      |       |       |       |       |  |
|----------------------|---------|-------------|------|------|------|------|------|------|------|------|-------|-------|-------|-------|--|
|                      |         | 2           | 4    | 6    | 8    | 12   | 16   | 20   | 30   | 40   | 50    | 60    | 70    | 80    |  |
| peptide dimer / 1+   | 3522.74 | 10          | 10   | 10   | 10   | 10   | 10   | 10   | 10   | 10   | 10    | 10    | 10    | 10    |  |
| peptide 5 / 1+       | 1761.87 | 11          | 10   | 18   | 11   | 12   | 18   | 40   | 73   | 136  | 211   | 338   | 475   | 557   |  |
| peptide 5 / 2+       | 881.45  | 180         | 223  | 575  | 586  | 958  | 1509 | 2090 | 4087 | 7348 | 11742 | 12777 | 13021 | 12868 |  |
| peptide 5 +Na / 3+   | 595.39  | 13          | 10   | 15   | 37   | 39   | 50   | 68   | 148  | 239  | 377   | 312   | 322   | 271   |  |
| peptide 5 / 4+       | 441.22  | 10          | 10   | 10   | 10   | 10   | 10   | 10   | 10   | 10   | 10    | 10    | 10    | 10    |  |
| antibody+0 pep / 29+ | 5052    | 50          | 50   | 50   | 50   | 50   | 50   | 50   | 50   | 50   | 50    | 50    | 50    | 50    |  |
| antibody+0 pep / 28+ | 5233    | 770         | 919  | 774  | 1008 | 855  | 795  | 804  | 967  | 975  | 1065  | 963   | 912   | 823   |  |
| antibody+0 pep / 27+ | 5424    | 3299        | 3986 | 3179 | 4085 | 3848 | 3720 | 3456 | 4254 | 4242 | 4630  | 4471  | 4330  | 4039  |  |
| antibody+0 pep / 26+ | 5634    | 6506        | 7832 | 6460 | 8330 | 8075 | 8057 | 7310 | 8575 | 8963 | 9811  | 9470  | 9472  | 9305  |  |
| antibody+0 pep / 25+ | 5860    | 5871        | 7004 | 6031 | 7671 | 7886 | 7734 | 7121 | 8241 | 8770 | 9646  | 9718  | 9859  | 9898  |  |
| antibody+0 pep / 24+ | 6103    | 2849        | 3464 | 3077 | 3934 | 4240 | 4334 | 3983 | 4528 | 5155 | 5785  | 6007  | 6199  | 6211  |  |
| antibody+0 pep / 23+ | 6371    | 797         | 942  | 944  | 1183 | 1332 | 1368 | 1262 | 1460 | 1889 | 2238  | 2557  | 2703  | 2712  |  |
| antibody+0 pep / 22+ | 6659    | 50          | 50   | 50   | 50   | 50   | 50   | 50   | 50   | 50   | 50    | 50    | 50    | 50    |  |
| antibody+1 pep/ 29+  | 5112    | 50          | 50   | 50   | 50   | 50   | 50   | 50   | 50   | 50   | 50    | 50    | 50    | 50    |  |
| antibody+1 pep/ 28+  | 5296    | 968         | 1133 | 1001 | 1197 | 1012 | 986  | 1025 | 1090 | 1088 | 1131  | 1069  | 968   | 875   |  |
| antibody+1 pep/ 27+  | 5491    | 4180        | 4834 | 4187 | 4923 | 4435 | 4229 | 4213 | 4681 | 4779 | 4943  | 4715  | 4539  | 4111  |  |
| antibody+1 pep/ 26+  | 5701    | 7757        | 8785 | 7731 | 9131 | 8945 | 8649 | 8367 | 9055 | 9009 | 9560  | 9069  | 9119  | 8505  |  |
| antibody+1 pep/ 25+  | 5930    | 6205        | 7065 | 6673 | 7702 | 7734 | 7771 | 7235 | 7859 | 8131 | 8481  | 8383  | 8412  | 8281  |  |
| antibody+1 pep/ 24+  | 6177    | 2810        | 3196 | 3142 | 3752 | 3922 | 3966 | 3689 | 3899 | 4294 | 4581  | 4706  | 4779  | 4867  |  |
| antibody+1 pep/ 23+  | 6445    | 684         | 847  | 831  | 945  | 1055 | 1089 | 1062 | 1087 | 1334 | 1526  | 1690  | 1748  | 1810  |  |
| antibody+1 pep/ 22+  | 6739    | 50          | 50   | 50   | 50   | 50   | 50   | 50   | 50   | 50   | 50    | 50    | 50    | 50    |  |
| antibody+2 peps/ 29+ | 5173    | 50          | 50   | 50   | 50   | 50   | 50   | 50   | 50   | 50   | 50    | 50    | 50    | 50    |  |
| antibody+2 peps/ 28+ | 5358    | 380         | 403  | 391  | 401  | 359  | 321  | 349  | 373  | 354  | 389   | 335   | 298   | 293   |  |
| antibody+2 peps/ 27+ | 5554    | 1473        | 1552 | 1597 | 1579 | 1365 | 1363 | 1446 | 1451 | 1403 | 1435  | 1382  | 1289  | 1167  |  |
| antibody+2 peps/ 26+ | 5768    | 2643        | 2774 | 2915 | 2819 | 2639 | 2558 | 2676 | 2692 | 2611 | 2610  | 2436  | 2381  | 2214  |  |
| antibody+2 peps/ 25+ | 6000    | 1999        | 2042 | 2434 | 2216 | 2321 | 2208 | 2198 | 2172 | 2188 | 2054  | 2063  | 1945  | 1946  |  |
| antibody+2 peps/ 24+ | 6250    | 771         | 824  | 1008 | 923  | 1020 | 986  | 949  | 953  | 993  | 995   | 986   | 983   | 990   |  |
| antibody+2 peps/ 23+ | 6524    | 185         | 181  | 239  | 215  | 239  | 243  | 234  | 238  | 269  | 311   | 323   | 331   | 351   |  |
| antibody+2 peps/ 22+ | 6818    | 50          | 50   | 50   | 50   | 50   | 50   | 50   | 50   | 50   | 50    | 50    | 50    | 50    |  |

|                   |      |      |      |      |      |      |      |      |      |      |      |      |      |      |
|-------------------|------|------|------|------|------|------|------|------|------|------|------|------|------|------|
| antibody fragment | 1000 | n.d. | 20   |
| antibody fragment | 1324 | n.d. | 20   |
| antibody fragment | 1471 | n.d. | 287  |
| antibody fragment | 1554 | n.d. | 20   | 20   | 20   | n.d. |
| antibody fragment | 1655 | n.d. | 20   | 20   | 20   | 408  |
| antibody fragment | 1751 | n.d. | 20   | 20   | 20   | n.d. |
| antibody fragment | 1851 | n.d. | 160  | 475  | n.d. |
| antibody fragment | 1998 | n.d. | 243  | 450  | 605  |
| antibody fragment | 2189 | n.d. | 57   | 131  | 256  | 299  |
| antibody fragment | 2508 | 20   | 20   | 20   | 20   | 20   | 20   | 20   | 20   | 20   | n.d. | 20   | 20   | 127  |
| antibody fragment | 2819 | 20   | 20   | 20   | 20   | 20   | 20   | 20   | 20   | 20   | n.d. | 20   | 20   | 20   |
| antibody fragment | 3336 | 167  | 171  | 151  | 182  | 191  | 174  | 205  | 212  | 220  | 175  | 148  | 123  | 118  |
| antibody fragment | 3590 | 138  | 154  | 163  | 156  | 192  | 202  | 188  | 198  | 194  | 172  | 180  | 149  | 160  |
| antibody fragment | 3886 | 61   | 77   | 79   | 80   | 90   | 83   | 82   | 95   | 87   | 93   | 80   | 83   | 80   |
| antibody fragment | 4200 | 20   | 20   | 20   | 20   | 20   | 20   | 20   | 20   | 20   | 20   | 20   | 20   | 20   |
| antibody fragment | 4400 | 20   | 20   | 20   | 20   | 20   | 20   | 20   | 20   | 20   | 20   | 20   | 20   | 20   |

a) Imputed values necessary for optimized Gauss-fit are shown in red and are equal to the background intensity at the given m/z.

b) n.d.: value not determined / ion signal not present.

Table S7. continued

peptide 5, measurement 2

| ion / charge state   | m/z     | $\Delta CV$ |       |       |       |       |       |       |       |       |       |       |       |       |
|----------------------|---------|-------------|-------|-------|-------|-------|-------|-------|-------|-------|-------|-------|-------|-------|
|                      |         | 2           | 4     | 6     | 8     | 12    | 16    | 20    | 30    | 40    | 50    | 60    | 70    | 80    |
| peptide dimer / 1+   | 3522.74 | 10          | 10    | 10    | 10    | 10    | 10    | 10    | 10    | 10    | 10    | 10    | 10    | 10    |
| peptide 5 / 1+       | 1761.87 | 16          | 16    | 16    | 15    | 26    | 29    | 49    | 131   | 229   | 453   | 633   | 889   | 1034  |
| peptide 5 / 2+       | 881.45  | 282         | 459   | 661   | 1042  | 1943  | 3278  | 4289  | 7363  | 13246 | 20645 | 23458 | 23539 | 22850 |
| peptide 5 +Na / 3+   | 595.39  | 25          | 42    | 35    | 56    | 98    | 167   | 129   | 234   | 403   | 629   | 674   | 646   | 603   |
| peptide 5 / 4+       | 441.22  | 10          | 10    | 10    | 10    | 10    | 10    | 10    | 10    | 10    | 10    | 10    | 10    | 10    |
| antibody+0 pep / 29+ | 5052    | 50          | 50    | 50    | 50    | 50    | 50    | 50    | 50    | 50    | 50    | 50    | 50    | 50    |
| antibody+0 pep / 28+ | 5233    | 1101        | 1292  | 1341  | 1129  | 1182  | 1230  | 1047  | 1077  | 1001  | 1112  | 1048  | 1005  | 936   |
| antibody+0 pep / 27+ | 5424    | 4832        | 5740  | 5657  | 5043  | 5265  | 5535  | 4980  | 5240  | 5151  | 5484  | 5125  | 5024  | 4712  |
| antibody+0 pep / 26+ | 5634    | 9934        | 11478 | 11772 | 11194 | 11507 | 12212 | 11312 | 12011 | 12153 | 12957 | 12631 | 12246 | 11626 |
| antibody+0 pep / 25+ | 5860    | 9483        | 10844 | 11257 | 11280 | 11566 | 11835 | 11741 | 12509 | 13149 | 14158 | 14648 | 13567 | 13313 |
| antibody+0 pep / 24+ | 6103    | 5055        | 5523  | 5968  | 6269  | 6410  | 6641  | 6840  | 7217  | 8301  | 9110  | 9997  | 9361  | 9084  |
| antibody+0 pep / 23+ | 6371    | 1503        | 1644  | 1868  | 2083  | 2204  | 2177  | 2396  | 2604  | 3265  | 4004  | 4485  | 4220  | 4197  |
| antibody+0 pep / 22+ | 6659    | 50          | 50    | 50    | 50    | 50    | 50    | 50    | 50    | 50    | 50    | 50    | 50    | 50    |
| antibody+1 pep/ 29+  | 5112    | 50          | 50    | 50    | 50    | 50    | 50    | 50    | 50    | 50    | 50    | 50    | 50    | 50    |
| antibody+1 pep/ 28+  | 5296    | 1517        | 1653  | 1584  | 1405  | 1439  | 1498  | 1295  | 1349  | 1218  | 1263  | 1127  | 1194  | 1088  |
| antibody+1 pep/ 27+  | 5491    | 6629        | 7102  | 6922  | 6375  | 6674  | 6825  | 6191  | 6480  | 6115  | 6374  | 5813  | 5746  | 5341  |
| antibody+1 pep/ 26+  | 5701    | 12833       | 13630 | 13505 | 13111 | 13729 | 13851 | 13466 | 13638 | 13576 | 13796 | 13324 | 12893 | 12374 |
| antibody+1 pep/ 25+  | 5930    | 10919       | 11416 | 11924 | 11933 | 12324 | 12433 | 12606 | 12753 | 13382 | 13541 | 13913 | 13067 | 12573 |
| antibody+1 pep/ 24+  | 6177    | 5164        | 5403  | 5746  | 6352  | 6463  | 6592  | 6719  | 6902  | 7663  | 8079  | 8542  | 8085  | 7949  |
| antibody+1 pep/ 23+  | 6445    | 1350        | 1380  | 1559  | 1814  | 1851  | 1917  | 2077  | 2124  | 2558  | 2962  | 3256  | 3120  | 3133  |
| antibody+1 pep/ 22+  | 6739    | 50          | 50    | 50    | 50    | 50    | 50    | 50    | 50    | 50    | 50    | 50    | 50    | 50    |
| antibody+2 peps/ 29+ | 5173    | 50          | 50    | 50    | 50    | 50    | 50    | 50    | 50    | 50    | 50    | 50    | 50    | 50    |
| antibody+2 peps/ 28+ | 5358    | 600         | 635   | 602   | 569   | 528   | 561   | 516   | 532   | 489   | 475   | 411   | 426   | 423   |
| antibody+2 peps/ 27+ | 5554    | 2437        | 2442  | 2270  | 2247  | 2270  | 2366  | 2199  | 2206  | 2149  | 2113  | 1886  | 1832  | 1720  |
| antibody+2 peps/ 26+ | 5768    | 4496        | 4449  | 4192  | 4308  | 4437  | 4542  | 4449  | 4401  | 4236  | 4094  | 3919  | 3726  | 3632  |
| antibody+2 peps/ 25+ | 6000    | 3749        | 3572  | 3564  | 3800  | 3875  | 3933  | 3864  | 3924  | 3937  | 3694  | 3706  | 3401  | 3409  |
| antibody+2 peps/ 24+ | 6250    | 1514        | 1479  | 1626  | 1762  | 1842  | 1860  | 1924  | 1901  | 1997  | 1924  | 2004  | 1843  | 1782  |
| antibody+2 peps/ 23+ | 6524    | 341         | 341   | 379   | 436   | 464   | 453   | 488   | 509   | 588   | 626   | 613   | 591   | 596   |
| antibody+2 peps/ 22+ | 6818    | 50          | 50    | 50    | 50    | 50    | 50    | 50    | 50    | 50    | 50    | 50    | 50    | 50    |

|                   |      |      |      |      |      |      |      |      |      |      |      |      |      |      |
|-------------------|------|------|------|------|------|------|------|------|------|------|------|------|------|------|
| antibody fragment | 1000 | n.d. | 20   | 20   | 20   | 20   | 20   | 20   |
| antibody fragment | 1175 | n.d. | 65   | 103  | 175  | n.d. | n.d. | n.d. |
| antibody fragment | 1324 | n.d. | 134  |
| antibody fragment | 1471 | n.d. | 143  | 316  |
| antibody fragment | 1554 | n.d. | 45   | 65   | 89   | 148  | 177  | n.d. |
| antibody fragment | 1655 | n.d. | 454  |
| antibody fragment | 1751 | n.d. | 128  | 197  | 304  | n.d. |
| antibody fragment | 1851 | n.d. | 20   | n.d. | n.d. | n.d. | n.d. | n.d. |
| antibody fragment | 1892 | n.d. | 20   | n.d. | n.d. | n.d. | n.d. | n.d. |
| antibody fragment | 1998 | n.d. | 86   | 129  | 194  | n.d. | n.d. |
| antibody fragment | 2006 | n.d. | 353  | 436  |
| antibody fragment | 2160 | n.d. | 20   | 20   | n.d. | n.d. | n.d. |
| antibody fragment | 2189 | n.d. | 20   | 20   | n.d. | n.d. | n.d. |
| antibody fragment | 2331 | n.d. | 85   | n.d. | 157  |
| antibody fragment | 2508 | 20   | 20   | 20   | 20   | 20   | 20   | 20   | 20   | 20   | 20   | 20   | 138  | n.d. |
| antibody fragment | 2819 | 20   | 20   | 20   | 20   | 20   | 20   | 20   | 20   | 20   | 20   | 20   | 20   | 20   |
| antibody fragment | 3336 | 167  | 176  | 175  | 189  | 216  | 193  | 219  | 230  | 228  | 192  | 164  | 125  | 116  |
| antibody fragment | 3590 | 219  | 201  | 225  | 239  | 272  | 268  | 268  | 261  | 259  | 241  | 241  | 226  | 190  |
| antibody fragment | 3886 | 99   | 97   | 98   | 113  | 112  | 112  | 112  | 112  | 130  | 117  | 113  | 126  | 123  |
| antibody fragment | 4200 | 20   | 20   | 20   | 20   | 20   | 20   | 20   | 20   | 20   | 20   | 20   | 20   | 20   |
| antibody fragment | 4400 | 20   | 20   | 20   | 20   | 20   | 20   | 20   | 20   | 20   | 20   | 20   | 20   | 20   |

a) Imputed values necessary for optimized Gauss-fit are shown in red and are equal to the background intensity at the given m/z.

b) n.d.: value not determined / ion signal not present.

Table S7. continued

peptide 5, measurement 3

| ion / charge state   | m/z     | $\Delta CV$ |       |       |       |       |       |       |       |       |       |       |       |       |
|----------------------|---------|-------------|-------|-------|-------|-------|-------|-------|-------|-------|-------|-------|-------|-------|
|                      |         | 2           | 4     | 6     | 8     | 12    | 16    | 20    | 30    | 40    | 50    | 60    | 70    | 80    |
| peptide dimer / 1+   | 3522.74 | 10          | 10    | 10    | 10    | 10    | 10    | 10    | 10    | 10    | 10    | 10    | 10    | 10    |
| peptide 5 / 1+       | 1761.87 | 11          | 14    | 13    | 13    | 20    | 29    | 54    | 148   | 219   | 412   | 617   | 924   | 1021  |
| peptide 5 / 2+       | 881.45  | 256         | 314   | 554   | 826   | 1567  | 2717  | 4012  | 6704  | 12217 | 19274 | 22342 | 22683 | 22872 |
| peptide 5 +Na/ 3+    | 595.39  | 15          | 17    | 37    | 38    | 74    | 131   | 167   | 247   | 456   | 688   | 666   | 681   | 597   |
| peptide 5 / 4+       | 441.22  | 10          | 10    | 10    | 10    | 10    | 10    | 10    | 10    | 10    | 10    | 10    | 10    | 10    |
| antibody+0 pep / 29+ | 5052    | 50          | 50    | 50    | 50    | 50    | 50    | 50    | 50    | 50    | 50    | 50    | 50    | 50    |
| antibody+0 pep / 28+ | 5233    | 740         | 705   | 897   | 819   | 829   | 1062  | 1174  | 1069  | 1097  | 997   | 1082  | 1092  | 1108  |
| antibody+0 pep / 27+ | 5424    | 3344        | 3399  | 4178  | 3921  | 3978  | 4802  | 4981  | 5070  | 5080  | 5082  | 5369  | 5339  | 5442  |
| antibody+0 pep / 26+ | 5634    | 7454        | 7858  | 9070  | 8872  | 9076  | 10150 | 10723 | 10931 | 11298 | 12005 | 12579 | 12628 | 12848 |
| antibody+0 pep / 25+ | 5860    | 7549        | 8235  | 9033  | 9119  | 9329  | 10021 | 10534 | 11128 | 11856 | 13331 | 14188 | 14161 | 14426 |
| antibody+0 pep / 24+ | 6103    | 4359        | 4716  | 4997  | 5161  | 5389  | 5517  | 6011  | 6490  | 7434  | 8663  | 9453  | 9557  | 9730  |
| antibody+0 pep / 23+ | 6371    | 1364        | 1498  | 1570  | 1684  | 1771  | 1742  | 1896  | 2242  | 2902  | 3728  | 4082  | 4351  | 4298  |
| antibody+0 pep / 22+ | 6659    | 50          | 50    | 50    | 50    | 50    | 50    | 50    | 50    | 50    | 50    | 50    | 50    | 50    |
| antibody+1 pep/ 29+  | 5112    | 50          | 50    | 50    | 50    | 50    | 50    | 50    | 50    | 50    | 50    | 50    | 50    | 50    |
| antibody+1 pep/ 28+  | 5296    | 989         | 992   | 1192  | 1139  | 1085  | 1350  | 1359  | 1331  | 1272  | 1146  | 1199  | 1186  | 1268  |
| antibody+1 pep/ 27+  | 5491    | 4728        | 4798  | 5491  | 5325  | 5279  | 6054  | 6070  | 6217  | 5969  | 5560  | 5725  | 5678  | 5804  |
| antibody+1 pep/ 26+  | 5701    | 9821        | 10257 | 11217 | 11330 | 11253 | 11999 | 12550 | 12623 | 12760 | 12840 | 12953 | 12826 | 12824 |
| antibody+1 pep/ 25+  | 5930    | 9144        | 9581  | 10214 | 10556 | 10686 | 10751 | 11147 | 11569 | 11997 | 12609 | 12815 | 12800 | 12932 |
| antibody+1 pep/ 24+  | 6177    | 4785        | 5129  | 5134  | 5417  | 5724  | 5350  | 5607  | 6043  | 6761  | 7471  | 7756  | 7768  | 7818  |
| antibody+1 pep/ 23+  | 6445    | 1278        | 1383  | 1398  | 1514  | 1624  | 1493  | 1528  | 1749  | 2210  | 2692  | 2839  | 2962  | 2989  |
| antibody+1 pep/ 22+  | 6739    | 50          | 50    | 50    | 50    | 50    | 50    | 50    | 50    | 50    | 50    | 50    | 50    | 50    |
| antibody+2 peps/ 29+ | 5173    | 50          | 50    | 50    | 50    | 50    | 50    | 50    | 50    | 50    | 50    | 50    | 50    | 50    |
| antibody+2 peps/ 28+ | 5358    | 433         | 444   | 484   | 503   | 459   | 526   | 507   | 503   | 489   | 416   | 438   | 397   | 418   |
| antibody+2 peps/ 27+ | 5554    | 1873        | 1870  | 2039  | 2072  | 1993  | 2066  | 2072  | 2021  | 1994  | 1766  | 1766  | 1708  | 1768  |
| antibody+2 peps/ 26+ | 5768    | 3683        | 3792  | 3910  | 4072  | 3975  | 3988  | 4007  | 4071  | 3997  | 3678  | 3594  | 3436  | 3424  |
| antibody+2 peps/ 25+ | 6000    | 3138        | 3348  | 3350  | 3534  | 3611  | 3392  | 3457  | 3526  | 3564  | 3418  | 3293  | 3214  | 3252  |
| antibody+2 peps/ 24+ | 6250    | 1439        | 1557  | 1479  | 1602  | 1664  | 1557  | 1500  | 1569  | 1742  | 1827  | 1695  | 1676  | 1655  |
| antibody+2 peps/ 23+ | 6524    | 343         | 384   | 337   | 365   | 390   | 350   | 376   | 387   | 450   | 550   | 521   | 529   | 508   |
| antibody+2 peps/ 22+ | 6818    | 50          | 50    | 50    | 50    | 50    | 50    | 50    | 50    | 50    | 50    | 50    | 50    | 50    |

|                   |      |      |      |      |      |      |      |      |      |      |      |      |      |      |
|-------------------|------|------|------|------|------|------|------|------|------|------|------|------|------|------|
| antibody fragment | 1000 | n.d. | 20   | 20   | 20   | 20   | 20   | 20   |
| antibody fragment | 1175 | n.d. |
| antibody fragment | 1324 | n.d. | 103  |
| antibody fragment | 1471 | n.d. | 138  | 342  |
| antibody fragment | 1554 | n.d. | 141  | n.d. | n.d. |
| antibody fragment | 1655 | n.d. | 418  |
| antibody fragment | 1751 | n.d. | 56   | 79   | 123  | 212  | 301  | n.d. |
| antibody fragment | 1851 | n.d. | 96   | 141  | n.d. |
| antibody fragment | 2006 | n.d. | 33   | 77   | 116  | n.d. | n.d. | 446  |
| antibody fragment | 2189 | n.d. | 20   | 20   | 20   | 20   | 20   | n.d. |
| antibody fragment | 2207 | n.d. | 20   | 20   | 20   | 20   | 20   | n.d. |
| antibody fragment | 2508 | 20   | 20   | 20   | 20   | 20   | 20   | 20   | 20   | 20   | 20   | 20   | n.d. | 220  |
| antibody fragment | 2819 | 20   | 20   | 20   | 20   | 20   | 20   | 20   | 20   | 20   | 20   | 20   | n.d. | n.d. |
| antibody fragment | 3336 | 140  | 157  | 155  | 174  | 187  | 163  | 176  | 180  | 192  | 190  | 187  | 151  | 20   |
| antibody fragment | 3590 | 173  | 176  | 190  | 202  | 201  | 213  | 210  | 216  | 235  | 250  | 248  | 237  | 214  |
| antibody fragment | 3728 | n.d. | 214  |
| antibody fragment | 3886 | 81   | 79   | 91   | 85   | 95   | 89   | 85   | 102  | 110  | 108  | 120  | 115  | 137  |
| antibody fragment | 4200 | 20   | 20   | 20   | 20   | 20   | 20   | 20   | 20   | 20   | 20   | 20   | 20   | 20   |
| antibody fragment | 4400 | 20   | 20   | 20   | 20   | 20   | 20   | 20   | 20   | 20   | 20   | 20   | 20   | 20   |

a) Imputed values necessary for optimized Gauss-fit are shown in red and are equal to the background intensity at the given m/z.

b) n.d.: value not determined / ion signal not present.



Table S7. continued

peptide 5, measurement 4

| ion / charge state   | m/z     | $\Delta$ CV |      |      |      |      |      |      |      |       |       |       |       |       |
|----------------------|---------|-------------|------|------|------|------|------|------|------|-------|-------|-------|-------|-------|
|                      |         | 2           | 4    | 6    | 8    | 12   | 16   | 20   | 30   | 40    | 50    | 60    | 70    | 80    |
| peptide dimer / 1+   | 3522.74 | 5           | 5    | 5    | 5    | 10   | 10   | 10   | 10   | 10    | 10    | 10    | 10    | 10    |
| peptide 5 / 1+       | 1761.87 | 7           | 12   | 9    | 9    | 14   | 18   | 22   | 40   | 67    | 114   | 244   | 316   | 364   |
| peptide 5 / 2+       | 881.45  | 95          | 330  | 586  | 953  | 1748 | 2953 | 2604 | 2853 | 4909  | 7857  | 11720 | 13183 | 13547 |
| peptide 5 / 3+       | 588.26  | 6           | 8    | 7    | 13   | 17   | 36   | 25   | 27   | 37    | 67    | 69    | 67    | 69    |
| peptide 5 +Na / 3+   | 595.39  | n.d.        | n.d. | n.d. | n.d. | n.d. | n.d. | n.d. | n.d. | n.d.  | n.d.  | 37    | 26    | 47    |
| peptide 5 / 4+       | 441.22  | 5           | 5    | 5    | 5    | 10   | 10   | 10   | 10   | 10    | 10    | 10    | 10    | 10    |
| antibody+0 pep / 29+ | 5054    | 50          | 50   | 50   | 50   | 50   | 50   | 50   | 50   | 50    | 50    | 50    | 50    | 50    |
| antibody+0 pep / 28+ | 5229    | 131         | 213  | 320  | 418  | 544  | 697  | 771  | 752  | 779   | 854   | 881   | 895   | 881   |
| antibody+0 pep / 27+ | 5424    | 859         | 1334 | 2135 | 2534 | 3219 | 3858 | 3870 | 4147 | 4138  | 4636  | 4810  | 4880  | 4791  |
| antibody+0 pep / 26+ | 5634    | 2125        | 3426 | 5179 | 6065 | 7548 | 8709 | 8853 | 9619 | 9754  | 10742 | 11006 | 11315 | 11204 |
| antibody+0 pep / 25+ | 5860    | 2292        | 3875 | 5604 | 6622 | 8248 | 9187 | 9201 | 9816 | 10488 | 11490 | 12216 | 12578 | 12537 |
| antibody+0 pep / 24+ | 6103    | 1282        | 2103 | 3076 | 3755 | 4478 | 5040 | 5044 | 5443 | 6201  | 6809  | 7279  | 7446  | 7293  |
| antibody+0 pep / 23+ | 6371    | 417         | 658  | 946  | 1155 | 1416 | 1539 | 1664 | 1800 | 2141  | 2492  | 2699  | 2768  | 2824  |
| antibody+0 pep / 22+ | 6655    | 60          | 93   | 135  | 159  | 201  | 242  | 265  | 365  | 427   | 566   | 647   | 679   | 722   |
| antibody+0 pep / 21+ | 6975    | 50          | 50   | 50   | 50   | 50   | 50   | 50   | 50   | 50    | 50    | 50    | 50    | 50    |
| antibody+1 pep/ 29+  | 5115    | 50          | 50   | 50   | 50   | 50   | 50   | 50   | 50   | 50    | 50    | 50    | 50    | 50    |
| antibody+1 pep/ 28+  | 5289    | 185         | 290  | 418  | 521  | 652  | 801  | 828  | 841  | 858   | 886   | 892   | 975   | 867   |
| antibody+1 pep/ 27+  | 5491    | 938         | 1535 | 2307 | 2645 | 3291 | 3819 | 3885 | 3987 | 3991  | 4260  | 4189  | 4272  | 4211  |
| antibody+1 pep/ 26+  | 5701    | 1925        | 3174 | 4681 | 5429 | 6710 | 7485 | 7357 | 7566 | 7542  | 8108  | 8147  | 8360  | 8173  |
| antibody+1 pep/ 25+  | 5930    | 1736        | 2828 | 4150 | 4869 | 5817 | 6498 | 6309 | 6657 | 6661  | 7126  | 7333  | 7169  | 7173  |
| antibody+1 pep/ 24+  | 6177    | 872         | 1330 | 1969 | 2328 | 2782 | 3039 | 3017 | 3049 | 3331  | 3554  | 3722  | 3670  | 3658  |
| antibody+1 pep/ 23+  | 6445    | 232         | 354  | 500  | 606  | 733  | 786  | 805  | 844  | 953   | 1089  | 1166  | 1218  | 1225  |
| antibody+1 pep/ 22+  | 6734    | 37          | 50   | 77   | 83   | 95   | 117  | 127  | 163  | 188   | 242   | 314   | 333   | 367   |
| antibody+1 pep/ 21+  | 7059    | 50          | 50   | 50   | 50   | 50   | 50   | 50   | 50   | 50    | 50    | 50    | 50    | 50    |
| antibody+2 peps/ 29+ | 5176    | 25          | 50   | 50   | 50   | 50   | 50   | 50   | 50   | 50    | 50    | 50    | 50    | 50    |
| antibody+2 peps/ 28+ | 5356    | 63          | 114  | 159  | 185  | 241  | 274  | 263  | 269  | 260   | 261   | 278   | 301   | 255   |
| antibody+2 peps/ 27+ | 5554    | 273         | 439  | 642  | 754  | 912  | 1064 | 1015 | 1029 | 961   | 1004  | 1011  | 1008  | 962   |
| antibody+2 peps/ 26+ | 5768    | 494         | 773  | 1157 | 1334 | 1558 | 1699 | 1692 | 1680 | 1637  | 1602  | 1610  | 1612  | 1607  |
| antibody+2 peps/ 25+ | 6000    | 377         | 604  | 886  | 1050 | 1152 | 1309 | 1207 | 1218 | 1192  | 1212  | 1216  | 1162  | 1149  |

|                             |      |      |      |      |      |      |      |      |      |      |      |      |      |      |
|-----------------------------|------|------|------|------|------|------|------|------|------|------|------|------|------|------|
| <b>antibody+2 peps/ 24+</b> | 6250 | 170  | 230  | 345  | 424  | 488  | 587  | 538  | 525  | 529  | 535  | 565  | 589  | 529  |
| <b>antibody+2 peps/ 23+</b> | 6524 | 47   | 61   | 84   | 99   | 124  | 154  | 143  | 159  | 187  | 197  | 199  | 210  | 206  |
| <b>antibody+2 peps/ 22+</b> | 6810 | 19   | 17   | 20   | 24   | 27   | 35   | 38   | 44   | 78   | 93   | 116  | 138  | 122  |
| <b>antibody+2 peps/ 21+</b> | 7141 | 25   | 50   | 50   | 50   | 50   | 50   | 50   | 50   | 50   | 50   | 50   | 50   | 50   |
|                             |      |      |      |      |      |      |      |      |      |      |      |      |      |      |
| <b>antibody fragment</b>    | 1000 | n.d. | 20   | 20   |
| <b>antibody fragment</b>    | 1175 | n.d. | 20   | 20   |
| <b>antibody fragment</b>    | 1324 | n.d. | 20   | 20   | 40   | 96   |
| <b>antibody fragment</b>    | 1440 | n.d. | 20   | 20   | 20   | n.d. | n.d. |
| <b>antibody fragment</b>    | 1471 | n.d. | 20   | 54   | 97   | 393  | 788  |
| <b>antibody fragment</b>    | 1554 | n.d. | 70   | 75   | n.d. | n.d. | n.d. |
| <b>antibody fragment</b>    | 1655 | n.d. | 162  | 497  | 1426 |
| <b>antibody fragment</b>    | 1751 | n.d. | 143  | 195  | 271  | n.d. | n.d. |
| <b>antibody fragment</b>    | 1892 | n.d. | 686  |
| <b>antibody fragment</b>    | 1998 | n.d. | 141  | 255  | 352  | 507  | 527  |
| <b>antibody fragment</b>    | 2331 | n.d. | 42   | 82   | 110  | 159  | 245  |
| <b>antibody fragment</b>    | 2403 | n.d. | 20   | n.d. | n.d. | n.d. | n.d. |
| <b>antibody fragment</b>    | 2508 | n.d. | 20   | 50   | 82   | 149  | 173  |
| <b>antibody fragment</b>    | 2591 | n.d. | 20   | n.d. | n.d. | n.d. |
| <b>antibody fragment</b>    | 2647 | n.d. | 20   | n.d. | n.d. | n.d. |
| <b>antibody fragment</b>    | 2819 | n.d. | 54   | 82   | 86   |
| <b>antibody fragment</b>    | 3336 | n.d. | 20   | 20   | 20   |
| <b>antibody fragment</b>    | 3461 | n.d. | 20   | 20   | 20   |

a) Imputed values necessary for optimized Gauss-fit are shown in red and are equal to the background intensity at the given m/z.

b) n.d.: value not determined / ion signal not present.

Table S7. continued

peptide 5, measurement 5

| ion / charge state   | m/z     | $\Delta CV$ |      |      |      |      |      |      |      |      |       |       |       |       |
|----------------------|---------|-------------|------|------|------|------|------|------|------|------|-------|-------|-------|-------|
|                      |         | 2           | 4    | 6    | 8    | 12   | 16   | 20   | 30   | 40   | 50    | 60    | 70    | 80    |
| peptide dimer / 1+   | 3522.74 | 5           | 5    | 5    | 5    | 10   | 10   | 10   | 10   | 10   | 10    | 10    | 10    | 10    |
| peptide 5 / 1+       | 1761.87 | 7           | 12   | 9    | 9    | 14   | 18   | 22   | 40   | 67   | 114   | 244   | 316   | 364   |
| peptide 5 / 2+       | 881.45  | 95          | 330  | 586  | 953  | 1748 | 2953 | 2604 | 2853 | 4909 | 7857  | 11720 | 13183 | 13547 |
| peptide 5 / 3+       | 588.26  | 6           | 8    | 7    | 13   | 17   | 36   | 25   | 27   | 37   | 67    | 69    | 67    | 69    |
| peptide 5 +Na / 3+   | 595.39  | n.d.        | n.d. | n.d. | n.d. | n.d. | n.d. | n.d. | n.d. | n.d. | n.d.  | 37    | 26    | 47    |
| peptide 5 / 4+       | 441.22  | 5           | 5    | 5    | 5    | 10   | 10   | 10   | 10   | 10   | 10    | 10    | 10    | 10    |
| antibody+0 pep / 29+ | 5054    | 50          | 50   | 50   | 50   | 50   | 50   | 50   | 50   | 50   | 50    | 50    | 50    | 50    |
| antibody+0 pep / 28+ | 5229    | 222         | 388  | 552  | 652  | 791  | 948  | 676  | 451  | 532  | 740   | 944   | 1050  | 1080  |
| antibody+0 pep / 27+ | 5424    | 1359        | 2166 | 3024 | 3492 | 4224 | 4730 | 3669 | 2632 | 3131 | 3896  | 5295  | 5612  | 5807  |
| antibody+0 pep / 26+ | 5634    | 3236        | 5211 | 7041 | 8091 | 9075 | 9968 | 7996 | 6697 | 7615 | 9554  | 11922 | 12868 | 13124 |
| antibody+0 pep / 25+ | 5860    | 3476        | 5371 | 7179 | 7941 | 8839 | 9741 | 8012 | 7076 | 8347 | 10242 | 12871 | 13912 | 14085 |
| antibody+0 pep / 24+ | 6103    | 1887        | 2792 | 3610 | 4034 | 4501 | 5009 | 4153 | 3978 | 4932 | 6058  | 7651  | 8235  | 8049  |
| antibody+0 pep / 23+ | 6371    | 538         | 765  | 987  | 1138 | 1352 | 1438 | 1347 | 1426 | 1853 | 2372  | 2854  | 3150  | 2978  |
| antibody+0 pep / 22+ | 6655    | 69          | 110  | 140  | 161  | 175  | 217  | 228  | 277  | 409  | 524   | 676   | 755   | 803   |
| antibody+0 pep / 21+ | 6975    | 50          | 50   | 50   | 50   | 50   | 50   | 50   | 50   | 50   | 50    | 50    | 50    | 50    |
| antibody+1 pep/ 29+  | 5115    | 50          | 50   | 50   | 50   | 50   | 50   | 50   | 50   | 50   | 50    | 50    | 50    | 50    |
| antibody+1 pep/ 28+  | 5289    | 278         | 436  | 612  | 746  | 889  | 1009 | 777  | 568  | 629  | 777   | 971   | 1035  | 1039  |
| antibody+1 pep/ 27+  | 5491    | 1469        | 2280 | 3107 | 3592 | 3963 | 4621 | 3482 | 2750 | 3081 | 3673  | 4539  | 4855  | 5003  |
| antibody+1 pep/ 26+  | 5701    | 2865        | 4683 | 6269 | 6856 | 7517 | 8140 | 6645 | 5552 | 6137 | 7397  | 8911  | 9247  | 9318  |
| antibody+1 pep/ 25+  | 5930    | 2461        | 3972 | 5168 | 5706 | 6311 | 6632 | 5428 | 5024 | 5570 | 6449  | 7623  | 8149  | 8164  |
| antibody+1 pep/ 24+  | 6177    | 1096        | 1709 | 2272 | 2520 | 2783 | 2891 | 2483 | 2355 | 2835 | 3162  | 3853  | 4029  | 4002  |
| antibody+1 pep/ 23+  | 6445    | 271         | 422  | 512  | 585  | 680  | 703  | 681  | 694  | 897  | 1022  | 1243  | 1392  | 1277  |
| antibody+1 pep/ 22+  | 6734    | 39          | 51   | 63   | 81   | 90   | 92   | 117  | 134  | 185  | 245   | 324   | 370   | 395   |
| antibody+1 pep/ 21+  | 7059    | 50          | 50   | 50   | 50   | 50   | 50   | 50   | 50   | 50   | 50    | 50    | 50    | 50    |
| antibody+2 peps/ 29+ | 5176    | 50          | 50   | 50   | 50   | 50   | 50   | 50   | 50   | 50   | 50    | 50    | 50    | 50    |
| antibody+2 peps/ 28+ | 5356    | 107         | 144  | 216  | 260  | 276  | 340  | 243  | 201  | 203  | 239   | 312   | 300   | 328   |
| antibody+2 peps/ 27+ | 5554    | 421         | 681  | 848  | 966  | 1047 | 1202 | 890  | 705  | 762  | 884   | 1042  | 1117  | 1109  |
| antibody+2 peps/ 26+ | 5768    | 714         | 1152 | 1451 | 1628 | 1723 | 1842 | 1517 | 1252 | 1318 | 1498  | 1686  | 1780  | 1794  |
| antibody+2 peps/ 25+ | 6000    | 493         | 784  | 1035 | 1119 | 1220 | 1229 | 1099 | 935  | 1024 | 1078  | 1294  | 1288  | 1241  |

|                             |      |      |      |      |      |      |      |      |      |      |      |      |      |      |
|-----------------------------|------|------|------|------|------|------|------|------|------|------|------|------|------|------|
| <b>antibody+2 peps/ 24+</b> | 6250 | 188  | 332  | 384  | 428  | 483  | 495  | 444  | 418  | 487  | 519  | 619  | 625  | 588  |
| <b>antibody+2 peps/ 23+</b> | 6524 | 53   | 69   | 87   | 101  | 112  | 137  | 134  | 135  | 151  | 204  | 203  | 232  | 222  |
| <b>antibody+2 peps/ 22+</b> | 6810 | 14   | 17   | 24   | 25   | 29   | 28   | 37   | 48   | 63   | 76   | 105  | 130  | 132  |
| <b>antibody+2 peps/ 21+</b> | 7141 | 50   | 50   | 50   | 50   | 50   | 50   | 50   | 50   | 50   | 50   | 50   | 50   | 50   |
|                             |      |      |      |      |      |      |      |      |      |      |      |      |      |      |
| <b>antibody fragment</b>    | 1000 | n.d. | 20   | 20   |
| <b>antibody fragment</b>    | 1175 | n.d. | 20   | 20   |
| <b>antibody fragment</b>    | 1324 | n.d. | 20   | 66   | 163  |
| <b>antibody fragment</b>    | 1440 | n.d. | 20   | 20   | 20   | n.d. | n.d. |
| <b>antibody fragment</b>    | 1471 | n.d. | 20   | 20   | 115  | 380  | 948  |
| <b>antibody fragment</b>    | 1554 | n.d. | 62   | 71   | 123  | n.d. | n.d. |
| <b>antibody fragment</b>    | 1655 | n.d. | 157  | 549  | 1794 |
| <b>antibody fragment</b>    | 1751 | n.d. | 116  | 139  | 300  | n.d. | n.d. |
| <b>antibody fragment</b>    | 1892 | n.d. | 772  |
| <b>antibody fragment</b>    | 1998 | n.d. | 94   | 210  | 379  | 526  | 580  |
| <b>antibody fragment</b>    | 2189 | n.d. | 44   | 85   | 158  | 265  | n.d. |
| <b>antibody fragment</b>    | 2331 | n.d. | 78   | 135  | 231  | 247  |
| <b>antibody fragment</b>    | 2508 | n.d. | 33   | 46   | 140  | 192  | 214  |
| <b>antibody fragment</b>    | 2558 | n.d. | 20   | 20   | n.d. | n.d. | n.d. |
| <b>antibody fragment</b>    | 2591 | n.d. | 20   | 20   | n.d. | n.d. | n.d. |
| <b>antibody fragment</b>    | 2647 | n.d. | 20   | 20   | n.d. | n.d. | n.d. |
| <b>antibody fragment</b>    | 2819 | n.d. | 49   | 89   | 109  |
| <b>antibody fragment</b>    | 3336 | n.d. | 20   | 20   | 20   |
| <b>antibody fragment</b>    | 3461 | n.d. | 20   | 20   | 20   |

a) Imputed values necessary for optimized Gauss-fit are shown in red and are equal to the background intensity at the given m/z.

b) n.d.: value not determined / ion signal not present.

**Table S8.** Ion species, charge states, m/z values and intensities for anti-Troponin I antibody complexed with Troponin I peptide 6 at measured collision cell voltage differences. <sup>a,b)</sup>

peptide 6, measurement 1

| ion / charge state   | m/z     | $\Delta CV$ |      |      |      |      |      |      |      |       |       |       |
|----------------------|---------|-------------|------|------|------|------|------|------|------|-------|-------|-------|
|                      |         | 4           | 8    | 12   | 16   | 20   | 30   | 40   | 50   | 60    | 70    | 80    |
| peptide dimer / 1+   | 3512.82 | 5           | 10   | 10   | 10   | 10   | 10   | 10   | 10   | 10    | 10    | 10    |
| peptide 6 / 1+       | 1757.95 | 6           | 11   | 11   | 10   | 13   | 43   | 85   | 114  | 189   | 248   | 315   |
| peptide 6 / 2+       | 878.94  | 155         | 345  | 714  | 1342 | 2466 | 4479 | 7350 | 9226 | 13505 | 15666 | 15398 |
| peptide 6 / 3+       | 586.37  | 102         | 242  | 428  | 801  | 1374 | 2061 | 3425 | 4118 | 5442  | 5440  | 5034  |
| peptide 6 / 4+       | 439.98  | 5           | 10   | 10   | 10   | 10   | 10   | 10   | 10   | 10    | 10    | 10    |
| antibody+0 pep / 28+ | 5233    | 20          | 20   | 20   | 20   | 20   | 20   | 20   | 20   | 20    | 20    | 20    |
| antibody+0 pep / 27+ | 5424    | 141         | 283  | 275  | 427  | 651  | 546  | 644  | 510  | 669   | 781   | 637   |
| antibody+0 pep / 26+ | 5633    | 866         | 1811 | 1730 | 2432 | 3443 | 3025 | 3409 | 2888 | 3792  | 4194  | 3779  |
| antibody+0 pep / 25+ | 5862    | 2046        | 4386 | 3977 | 5103 | 7108 | 6493 | 6976 | 6140 | 8039  | 8613  | 8197  |
| antibody+0 pep / 24+ | 6103    | 2285        | 4894 | 4253 | 5115 | 6768 | 6533 | 6992 | 6193 | 8033  | 8205  | 8051  |
| antibody+0 pep / 23+ | 6373    | 1308        | 2617 | 2339 | 2721 | 3430 | 3374 | 3604 | 3438 | 4455  | 4627  | 4491  |
| antibody+0 pep / 22+ | 6664    | 384         | 779  | 688  | 772  | 960  | 987  | 1141 | 1200 | 1510  | 1636  | 1555  |
| antibody+0 pep / 21+ | 6977    | 20          | 20   | 20   | 20   | 20   | 20   | 20   | 20   | 20    | 20    | 20    |
| antibody+1 pep/ 28+  | 5295    | 20          | 20   | 20   | 20   | 20   | 20   | 20   | 20   | 20    | 20    | 20    |
| antibody+1 pep/ 27+  | 5489    | 265         | 570  | 611  | 811  | 1099 | 903  | 1041 | 807  | 975   | 1078  | 905   |
| antibody+1 pep/ 26+  | 5700    | 1340        | 2976 | 2962 | 3551 | 4656 | 4012 | 4196 | 3496 | 4185  | 4460  | 4000  |
| antibody+1 pep/ 25+  | 5929    | 2534        | 5373 | 5416 | 6099 | 7440 | 6769 | 6825 | 6073 | 7040  | 7388  | 6800  |
| antibody+1 pep/ 24+  | 6177    | 2481        | 5218 | 5106 | 5446 | 6258 | 5890 | 5914 | 5277 | 6127  | 6383  | 5974  |
| antibody+1 pep/ 23+  | 6446    | 1173        | 2437 | 2380 | 2468 | 2684 | 2589 | 2690 | 2482 | 2935  | 3019  | 2899  |
| antibody+1 pep/ 22+  | 6743    | 337         | 688  | 631  | 624  | 699  | 704  | 737  | 797  | 886   | 983   | 939   |
| antibody+1 pep/ 21+  | 7059    | 20          | 20   | 20   | 20   | 20   | 20   | 20   | 20   | 20    | 20    | 20    |
| antibody+2 peps/ 28+ | 5356    | 20          | 20   | 20   | 20   | 20   | 20   | 20   | 20   | 20    | 20    | 20    |
| antibody+2 peps/ 27+ | 5553    | 139         | 319  | 327  | 391  | 429  | 368  | 375  | 323  | 336   | 357   | 307   |
| antibody+2 peps/ 26+ | 5766    | 562         | 1163 | 1220 | 1336 | 1434 | 1285 | 1269 | 1103 | 1072  | 1140  | 1003  |
| antibody+2 peps/ 25+ | 5997    | 925         | 1911 | 2070 | 2004 | 2101 | 1931 | 1831 | 1687 | 1564  | 1598  | 1513  |
| antibody+2 peps/ 24+ | 6249    | 771         | 1689 | 1711 | 1621 | 1592 | 1492 | 1402 | 1273 | 1279  | 1280  | 1145  |
| antibody+2 peps/ 23+ | 6522    | 312         | 642  | 662  | 657  | 570  | 567  | 546  | 518  | 509   | 518   | 482   |
| antibody+2 peps/ 22+ | 6819    | 98          | 177  | 176  | 167  | 137  | 153  | 154  | 160  | 163   | 174   | 177   |
| antibody+2 peps/ 21+ | 7141    | 20          | 20   | 20   | 20   | 20   | 20   | 20   | 20   | 20    | 20    | 20    |

|                   |      |      |      |      |      |      |      |      |      |      |      |      |
|-------------------|------|------|------|------|------|------|------|------|------|------|------|------|
| antibody fragment | 1000 | n.d. | 10   | 10   |
| antibody fragment | 1204 | n.d. | n.d. | n.d. | n.d. | n.d. | n.d. | 10   | 10   | 10   | 10   | 10   |
| antibody fragment | 1324 | n.d. | n.d. | n.d. | n.d. | n.d. | n.d. | 10   | 10   | 10   | 91   | 185  |
| antibody fragment | 1471 | n.d. | 34   | 164  | 602  | 1297 |
| antibody fragment | 1554 | n.d. | n.d. | n.d. | n.d. | n.d. | n.d. | 60   | 50   | n.d. | n.d. | n.d. |
| antibody fragment | 1655 | n.d. | 260  | 963  | 2450 |
| antibody fragment | 1751 | n.d. | n.d. | n.d. | n.d. | n.d. | n.d. | 123  | 116  | n.d. | n.d. | n.d. |
| antibody fragment | 1892 | n.d. | 1031 |
| antibody fragment | 1998 | n.d. | n.d. | n.d. | n.d. | n.d. | n.d. | 133  | 202  | 390  | 690  | 704  |
| antibody fragment | 2160 | n.d. | n.d. | n.d. | n.d. | n.d. | n.d. | 39   | 105  | 251  | 394  | 585  |
| antibody fragment | 2331 | n.d. | n.d. | n.d. | n.d. | n.d. | n.d. | 30   | 59   | 117  | 182  | 271  |
| antibody fragment | 2392 | n.d. | n.d. | n.d. | n.d. | n.d. | n.d. | 10   | n.d. | n.d. | n.d. | n.d. |
| antibody fragment | 2508 | n.d. | n.d. | n.d. | n.d. | n.d. | n.d. | 10   | 15   | 32   | 66   | n.d. |
| antibody fragment | 2819 | n.d. | 10   | 10   | 10   | 10   |
| antibody fragment | 3336 | n.d. | 10   | 10   | 10   | 10   |

a) Imputed values necessary for optimized Gauss-fit are shown in red and are equal to the background intensity at the given m/z.

b) n.d.: value not determined / ion signal not present.

Table S8. continued

peptide 6, measurement 2

| ion / charge state   | m/z     | $\Delta CV$ |      |      |      |      |      |      |      |      |      |      |
|----------------------|---------|-------------|------|------|------|------|------|------|------|------|------|------|
|                      |         | 4           | 8    | 12   | 16   | 20   | 30   | 40   | 50   | 60   | 70   | 80   |
| peptide dimer / 1+   | 3512.82 | 5           | 5    | 10   | 10   | 10   | 10   | 10   | 10   | 10   | 10   | 10   |
| peptide 6 / 1+       | 1756.91 | 4           | 8    | 12   | 8    | 10   | 11   | 45   | 63   | 90   | 145  | 187  |
| peptide 6 / 2+       | 878.97  | 35          | 149  | 342  | 716  | 1168 | 1573 | 3977 | 5988 | 8278 | 9190 | 9339 |
| peptide 6 / 3+       | 586.39  | 21          | 75   | 169  | 342  | 476  | 630  | 1407 | 2227 | 2444 | 2430 | 2398 |
| peptide 6 / 4+       | 439.98  | 5           | 10   | 10   | 10   | 10   | 10   | 10   | 10   | 10   | 10   | 10   |
| antibody+0 pep / 29+ | 5052    | 50          | 50   | 50   | 50   | 50   | 50   | 50   | 50   | 50   | 50   | 50   |
| antibody+0 pep / 28+ | 5236    | 162         | 326  | 412  | 459  | 449  | 473  | 627  | 621  | 574  | 535  | 502  |
| antibody+0 pep / 27+ | 5430    | 539         | 1253 | 1453 | 1536 | 1467 | 1668 | 2114 | 2104 | 2050 | 1986 | 1898 |
| antibody+0 pep / 26+ | 5637    | 1257        | 2812 | 2921 | 3068 | 2980 | 3339 | 4197 | 4340 | 4431 | 4344 | 4219 |
| antibody+0 pep / 25+ | 5858    | 1395        | 3136 | 3184 | 3283 | 3327 | 3545 | 4160 | 4573 | 4927 | 5178 | 5134 |
| antibody+0 pep / 24+ | 6102    | 924         | 2073 | 2021 | 2058 | 2036 | 2185 | 2571 | 2900 | 3321 | 3567 | 3478 |
| antibody+0 pep / 23+ | 6366    | 372         | 853  | 814  | 755  | 815  | 870  | 1039 | 1226 | 1444 | 1594 | 1612 |
| antibody+0 pep / 22+ | 6660    | 50          | 50   | 50   | 50   | 50   | 50   | 50   | 50   | 50   | 50   | 50   |
| antibody+1 pep/ 29+  | 5112    | 50          | 50   | 50   | 50   | 50   | 50   | 50   | 50   | 50   | 50   | 50   |
| antibody+1 pep/ 28+  | 5301    | 210         | 454  | 550  | 632  | 617  | 634  | 705  | 683  | 607  | 543  | 483  |
| antibody+1 pep/ 27+  | 5494    | 727         | 1661 | 1923 | 2055 | 2023 | 2012 | 2425 | 2214 | 2099 | 1924 | 1794 |
| antibody+1 pep/ 26+  | 5698    | 1479        | 3299 | 3476 | 3697 | 3838 | 3757 | 4094 | 4237 | 4149 | 4193 | 4006 |
| antibody+1 pep/ 25+  | 5927    | 1352        | 3076 | 3170 | 3370 | 3455 | 3474 | 3678 | 3815 | 4067 | 4161 | 3978 |
| antibody+1 pep/ 24+  | 6175    | 796         | 1724 | 1706 | 1745 | 1875 | 1916 | 2043 | 2148 | 2383 | 2457 | 2407 |
| antibody+1 pep/ 23+  | 6443    | 279         | 615  | 557  | 545  | 578  | 633  | 688  | 781  | 886  | 955  | 1016 |
| antibody+1 pep/ 22+  | 6738    | 50          | 50   | 50   | 50   | 50   | 50   | 50   | 50   | 50   | 50   | 50   |
| antibody+2 peps/ 29+ | 5171    | 50          | 50   | 50   | 50   | 50   | 50   | 50   | 50   | 50   | 50   | 50   |
| antibody+2 peps/ 28+ | 5365    | 121         | 255  | 298  | 329  | 353  | 260  | 250  | 247  | 195  | 176  | 180  |
| antibody+2 peps/ 27+ | 5552    | 392         | 887  | 951  | 993  | 1236 | 892  | 778  | 797  | 692  | 677  | 595  |
| antibody+2 peps/ 26+ | 5765    | 659         | 1501 | 1560 | 1686 | 2002 | 1445 | 1252 | 1264 | 1212 | 1143 | 1026 |
| antibody+2 peps/ 25+ | 5995    | 564         | 1237 | 1173 | 1246 | 1512 | 1117 | 947  | 1002 | 973  | 970  | 905  |
| antibody+2 peps/ 24+ | 6247    | 264         | 612  | 596  | 568  | 638  | 529  | 470  | 497  | 515  | 502  | 498  |
| antibody+2 peps/ 23+ | 6517    | 94          | 197  | 149  | 153  | 158  | 162  | 144  | 177  | 189  | 199  | 212  |
| antibody+2 peps/ 22+ | 6816    | 50          | 50   | 50   | 50   | 50   | 50   | 50   | 50   | 50   | 50   | 50   |

|                   |      |      |      |      |      |      |      |      |      |      |      |      |
|-------------------|------|------|------|------|------|------|------|------|------|------|------|------|
| antibody fragment | 1000 | n.d. | 20   | 20   | 20   | 20   |
| antibody fragment | 1324 | n.d. | 54   | 127  | 303  |
| antibody fragment | 1471 | n.d. | 97   | 226  | 550  |
| antibody fragment | 1554 | n.d. | 40   | n.d. | n.d. | n.d. |
| antibody fragment | 1655 | n.d. | 227  | 606  |
| antibody fragment | 1751 | n.d. | 68   | 120  | 187  | n.d. |
| antibody fragment | 1851 | n.d. | 96   | n.d. |
| antibody fragment | 1892 | n.d. | 86   | 219  |
| antibody fragment | 1998 | n.d. | 95   | n.d. | n.d. |
| antibody fragment | 2160 | n.d. | 20   | 20   | n.d. | n.d. |
| antibody fragment | 2189 | n.d. | 20   | 20   | n.d. | n.d. |
| antibody fragment | 2207 | n.d. | 20   | 20   | n.d. |
| antibody fragment | 2331 | n.d. | 20   | 71   | 20   |
| antibody fragment | 2508 | n.d. | 20   | 20   | 20   | 20   | 20   | 20   | 20   | n.d. | 100  | 20   |
| antibody fragment | 2819 | n.d. | 20   | 20   | 20   | 20   | 20   | 20   | 20   | n.d. | 42   | n.d. |
| antibody fragment | 3336 | n.d. | 79   | 64   | n.d. | n.d. | n.d. | n.d. | n.d. | 63   | 20   | n.d. |
| antibody fragment | 3461 | n.d. | 41   | n.d. |
| antibody fragment | 3590 | n.d. | 65   | 57   | 67   | 65   | 65   | 68   | 68   | 76   | 63   | n.d. |
| antibody fragment | 3728 | n.d. | 54   | n.d. |
| antibody fragment | 3886 | n.d. | 50   | n.d. | n.d. |
| antibody fragment | 4200 | n.d. | 20   | 20   | 20   | 20   | 20   | 20   | 20   | 20   | 20   | n.d. |
| antibody fragment | 4400 | n.d. | 20   | 20   | 20   | 20   | 20   | 20   | 20   | 20   | 20   | n.d. |

a) Imputed values necessary for optimized Gauss-fit are shown in red and are equal to the background intensity at the given m/z.

b) n.d.: value not determined / ion signal not present.



Table S8. continued

peptide 6, measurement 3

| ion / charge state   | m/z     | $\Delta$ CV |      |      |      |      |       |       |       |       |       |       |       |       |
|----------------------|---------|-------------|------|------|------|------|-------|-------|-------|-------|-------|-------|-------|-------|
|                      |         | 2           | 4    | 6    | 8    | 12   | 16    | 20    | 30    | 40    | 50    | 60    | 70    | 80    |
| peptide dimer / 1+   | 3512.82 | 5           | 5    | 10   | 10   | 10   | 10    | 10    | 10    | 10    | 10    | 10    | 10    | 10    |
| peptide 6 / 1+       | 1756.91 | 7           | 10   | 11   | 12   | 15   | 20    | 21    | 77    | 191   | 390   | 441   | 559   | 485   |
| peptide 6 / 2+       | 878.97  | 63          | 108  | 242  | 655  | 1573 | 3014  | 4865  | 8639  | 13170 | 29572 | 37478 | 44275 | 41327 |
| peptide 6 / 3+       | 586.39  | 87          | 138  | 365  | 574  | 1202 | 2142  | 3205  | 5014  | 6824  | 13908 | 15507 | 16916 | 14287 |
| peptide 6 / 4+       | 439.98  | 5           | 5    | 10   | 10   | 10   | 10    | 10    | 10    | 10    | 10    | 10    | 10    | 10    |
|                      |         |             |      |      |      |      |       |       |       |       |       |       |       |       |
| antibody+0 pep / 29+ | 5052    | 50          | 50   | 50   | 50   | 50   | 50    | 50    | 50    | 50    | 50    | 50    | 50    | 50    |
| antibody+0 pep / 28+ | 5236    | 137         | 223  | 244  | 321  | 432  | 568   | 688   | 740   | 931   | 3002  | 3583  | 4019  | 3633  |
| antibody+0 pep / 27+ | 5430    | 848         | 1567 | 1914 | 2421 | 3164 | 3897  | 4274  | 4786  | 5572  | 11255 | 12743 | 13825 | 12901 |
| antibody+0 pep / 26+ | 5637    | 2372        | 4300 | 5519 | 6520 | 8318 | 9814  | 10633 | 11777 | 13052 | 19995 | 21793 | 21907 | 21646 |
| antibody+0 pep / 25+ | 5858    | 2747        | 4854 | 6005 | 7396 | 9293 | 10885 | 11488 | 12767 | 14295 | 17772 | 18641 | 17956 | 17818 |
| antibody+0 pep / 24+ | 6102    | 1739        | 2837 | 3515 | 4411 | 5432 | 6459  | 6756  | 7631  | 8478  | 9380  | 9630  | 8822  | 8983  |
| antibody+0 pep / 23+ | 6366    | 621         | 1057 | 1235 | 1541 | 2001 | 2276  | 2553  | 2861  | 3494  | 3464  | 3601  | 3325  | 3430  |
| antibody+0 pep / 22+ | 6660    | 50          | 50   | 50   | 50   | 50   | 50    | 50    | 50    | 50    | 50    | 50    | 50    | 50    |
|                      |         |             |      |      |      |      |       |       |       |       |       |       |       |       |
| antibody+1 pep/ 29+  | 5112    | 50          | 50   | 50   | 50   | 50   | 50    | 50    | 50    | 50    | 50    | 50    | 50    | 50    |
| antibody+1 pep/ 28+  | 5301    | 209         | 379  | 446  | 590  | 749  | 936   | 1064  | 1260  | 1386  | 3334  | 3709  | 4051  | 3553  |
| antibody+1 pep/ 27+  | 5494    | 1205        | 2298 | 2713 | 3425 | 4253 | 5036  | 5519  | 5989  | 6637  | 10273 | 10980 | 11211 | 10453 |
| antibody+1 pep/ 26+  | 5698    | 2746        | 4857 | 6091 | 7305 | 9013 | 10655 | 11034 | 11850 | 12467 | 15205 | 15539 | 15003 | 14309 |
| antibody+1 pep/ 25+  | 5927    | 2518        | 4573 | 5491 | 6689 | 8296 | 9547  | 9906  | 10309 | 10787 | 11164 | 11245 | 10055 | 10048 |
| antibody+1 pep/ 24+  | 6175    | 1330        | 2233 | 2745 | 3364 | 4186 | 4807  | 5030  | 5270  | 5708  | 5181  | 5014  | 4491  | 4417  |
| antibody+1 pep/ 23+  | 6443    | 415         | 709  | 823  | 1075 | 1289 | 1508  | 1551  | 1729  | 1963  | 1710  | 1727  | 1565  | 1562  |
| antibody+1 pep/ 22+  | 6738    | 50          | 50   | 50   | 50   | 50   | 50    | 50    | 50    | 50    | 50    | 50    | 50    | 50    |
|                      |         |             |      |      |      |      |       |       |       |       |       |       |       |       |
| antibody+2 peps/ 29+ | 5171    | 50          | 50   | 50   | 50   | 50   | 50    | 50    | 50    | 50    | 50    | 50    | 50    | 50    |
| antibody+2 peps/ 28+ | 5365    | 89          | 176  | 214  | 271  | 348  | 410   | 420   | 475   | 531   | 969   | 1003  | 1094  | 962   |
| antibody+2 peps/ 27+ | 5552    | 459         | 760  | 970  | 1169 | 1440 | 1647  | 1763  | 1847  | 1872  | 2415  | 2353  | 2511  | 2161  |
| antibody+2 peps/ 26+ | 5765    | 800         | 1449 | 1747 | 2085 | 2502 | 2944  | 2934  | 2931  | 2920  | 3013  | 2952  | 2732  | 2564  |
| antibody+2 peps/ 25+ | 5995    | 652         | 1115 | 1342 | 1713 | 1929 | 2140  | 2185  | 2204  | 2225  | 1987  | 1812  | 1662  | 1565  |
| antibody+2 peps/ 24+ | 6247    | 288         | 521  | 617  | 725  | 894  | 1043  | 1044  | 1052  | 1075  | 874   | 814   | 807   | 679   |
| antibody+2 peps/ 23+ | 6517    | 94          | 144  | 170  | 205  | 252  | 303   | 306   | 339   | 369   | 328   | 339   | 362   | 336   |

|                             |      |      |      |      |      |      |      |      |      |      |      |      |      |      |
|-----------------------------|------|------|------|------|------|------|------|------|------|------|------|------|------|------|
| <b>antibody+2 peps/ 22+</b> | 6816 | 50   | 50   | 50   | 50   | 50   | 50   | 50   | 50   | 50   | 50   | 50   | 50   | 50   |
| <b>antibody fragment</b>    | 1000 | n.d. | 20   | 20   | 20   | 20   |
| <b>antibody fragment</b>    | 1324 | n.d. | 20   | 20   | 20   | 166  | 338  |
| <b>antibody fragment</b>    | 1471 | n.d. | 20   | 124  | 269  | 981  | 2041 |
| <b>antibody fragment</b>    | 1554 | n.d. | 132  | 211  | n.d. | n.d. | n.d. |
| <b>antibody fragment</b>    | 1655 | n.d. | 437  | 1256 | 2979 |
| <b>antibody fragment</b>    | 1751 | n.d. | 235  | 414  | 542  | n.d. | n.d. |
| <b>antibody fragment</b>    | 1892 | n.d. | 1393 |
| <b>antibody fragment</b>    | 1998 | n.d. | 227  | 511  | 717  | 830  | 836  |
| <b>antibody fragment</b>    | 2331 | n.d. | 61   | 213  | 308  | 408  | 495  |
| <b>antibody fragment</b>    | 2391 | n.d. | 20   | n.d. | n.d. | n.d. | n.d. |
| <b>antibody fragment</b>    | 2508 | n.d. | 20   | 83   | 133  | 177  | 245  |
| <b>antibody fragment</b>    | 2819 | n.d. | 20   | 20   | 20   | 20   |
| <b>antibody fragment</b>    | 3336 | n.d. | 20   | 20   | 20   | 20   |

a) Imputed values necessary for optimized Gauss-fit are shown in red and are equal to the background intensity at the given m/z.

b) n.d.: value not determined / ion signal not present.

TableS 8. continued

peptide 6, measurement 4

| ion / charge state   | m/z     | $\Delta CV$ |      |      |      |      |       |       |       |       |       |       |       |       |
|----------------------|---------|-------------|------|------|------|------|-------|-------|-------|-------|-------|-------|-------|-------|
|                      |         | 2           | 4    | 6    | 8    | 12   | 16    | 20    | 30    | 40    | 50    | 60    | 70    | 80    |
| peptide dimer / 1+   | 3512.82 | 5           | 5    | 10   | 10   | 10   | 10    | 10    | 10    | 10    | 10    | 10    | 10    | 10    |
| peptide 6 / 1+       | 1756.91 | 8           | 10   | 11   | 11   | 14   | 16    | 25    | 54    | 191   | 248   | 292   | 411   | 311   |
| peptide 6 / 2+       | 878.97  | 106         | 171  | 585  | 1001 | 1915 | 3565  | 5325  | 10738 | 16102 | 20261 | 23692 | 25560 | 24250 |
| peptide 6 / 3+       | 586.39  | 128         | 384  | 629  | 879  | 1466 | 2646  | 3823  | 6138  | 8564  | 9678  | 10013 | 9786  | 8539  |
| peptide 6 / 4+       | 439.98  | 5           | 5    | 10   | 10   | 10   | 10    | 10    | 10    | 10    | 10    | 10    | 10    | 10    |
| antibody+0 pep / 29+ | 5052    | 50          | 50   | 50   | 50   | 50   | 50    | 50    | 50    | 50    | 50    | 50    | 50    | 50    |
| antibody+0 pep / 28+ | 5236    | 352         | 486  | 679  | 918  | 1246 | 1604  | 1886  | 2260  | 2615  | 2548  | 2794  | 2811  | 2299  |
| antibody+0 pep / 27+ | 5430    | 1801        | 2591 | 3282 | 4313 | 5133 | 6183  | 6912  | 8064  | 9317  | 9577  | 10074 | 10267 | 9072  |
| antibody+0 pep / 26+ | 5637    | 3534        | 4949 | 6588 | 8269 | 9526 | 11225 | 12044 | 13489 | 15618 | 16379 | 17428 | 17213 | 15852 |
| antibody+0 pep / 25+ | 5858    | 3156        | 4281 | 5920 | 7177 | 8184 | 9196  | 9577  | 10966 | 12661 | 13665 | 14615 | 14513 | 13735 |
| antibody+0 pep / 24+ | 6102    | 1473        | 1972 | 2701 | 3330 | 3634 | 4134  | 4331  | 4985  | 5890  | 6688  | 7412  | 7167  | 7225  |
| antibody+0 pep / 23+ | 6366    | 407         | 499  | 749  | 842  | 1016 | 1114  | 1271  | 1659  | 2125  | 2484  | 2791  | 2747  | 2859  |
| antibody+0 pep / 22+ | 6660    | 50          | 50   | 50   | 50   | 50   | 50    | 50    | 50    | 50    | 50    | 50    | 50    | 50    |
| antibody+1 pep/ 29+  | 5112    | 50          | 50   | 50   | 50   | 50   | 50    | 50    | 50    | 50    | 50    | 50    | 50    | 50    |
| antibody+1 pep/ 28+  | 5301    | 586         | 843  | 1059 | 1419 | 1762 | 2260  | 2469  | 2790  | 3102  | 2810  | 2938  | 2968  | 2368  |
| antibody+1 pep/ 27+  | 5494    | 2286        | 3059 | 4059 | 5197 | 5973 | 7015  | 7404  | 8168  | 8749  | 8648  | 8746  | 8587  | 7644  |
| antibody+1 pep/ 26+  | 5698    | 3510        | 4857 | 6636 | 8073 | 9072 | 10064 | 10603 | 11407 | 12061 | 12293 | 12435 | 12383 | 11262 |
| antibody+1 pep/ 25+  | 5927    | 2554        | 3494 | 4798 | 5689 | 6541 | 6886  | 7025  | 7617  | 8195  | 8643  | 8558  | 8495  | 8078  |
| antibody+1 pep/ 24+  | 6175    | 1022        | 1466 | 1917 | 2329 | 2509 | 2745  | 2796  | 3036  | 3412  | 3738  | 3850  | 3749  | 3819  |
| antibody+1 pep/ 23+  | 6443    | 232         | 319  | 432  | 510  | 628  | 658   | 688   | 816   | 1007  | 1158  | 1292  | 1264  | 1308  |
| antibody+1 pep/ 22+  | 6738    | 50          | 50   | 50   | 50   | 50   | 50    | 50    | 50    | 50    | 50    | 50    | 50    | 50    |
| antibody+2 peps/ 29+ | 5171    | 50          | 50   | 50   | 50   | 50   | 50    | 50    | 50    | 50    | 50    | 50    | 50    | 50    |
| antibody+2 peps/ 28+ | 5365    | 232         | 350  | 435  | 545  | 624  | 823   | 815   | 950   | 909   | 814   | 769   | 769   | 664   |
| antibody+2 peps/ 27+ | 5552    | 738         | 1037 | 1301 | 1649 | 1815 | 2016  | 2159  | 2192  | 2127  | 2048  | 1941  | 1905  | 1699  |
| antibody+2 peps/ 26+ | 5765    | 939         | 1383 | 1780 | 2119 | 2284 | 2487  | 2549  | 2611  | 2479  | 2456  | 2364  | 2194  | 2087  |
| antibody+2 peps/ 25+ | 5995    | 573         | 800  | 1126 | 1308 | 1384 | 1483  | 1469  | 1485  | 1459  | 1401  | 1451  | 1343  | 1267  |
| antibody+2 peps/ 24+ | 6247    | 204         | 284  | 379  | 448  | 521  | 547   | 532   | 569   | 565   | 612   | 622   | 584   | 565   |
| antibody+2 peps/ 23+ | 6517    | 51          | 65   | 89   | 115  | 127  | 120   | 146   | 190   | 185   | 223   | 235   | 239   | 243   |

|                             |      |      |      |      |      |      |      |      |      |      |      |      |      |      |
|-----------------------------|------|------|------|------|------|------|------|------|------|------|------|------|------|------|
| <b>antibody+2 peps/ 22+</b> | 6816 | 50   | 50   | 50   | 50   | 50   | 50   | 50   | 50   | 50   | 50   | 50   | 50   | 50   |
| <b>antibody fragment</b>    | 1000 | n.d. | 20   | 20   | 20   | 20   |
| <b>antibody fragment</b>    | 1324 | n.d. | 20   | 20   | 20   | 94   | 225  |
| <b>antibody fragment</b>    | 1471 | n.d. | 20   | 77   | 227  | 617  | 1383 |
| <b>antibody fragment</b>    | 1554 | n.d. | 109  | 148  | n.d. | n.d. | n.d. |
| <b>antibody fragment</b>    | 1655 | n.d. | 351  | 930  | 2082 |
| <b>antibody fragment</b>    | 1751 | n.d. | 231  | 289  | 398  | n.d. | n.d. |
| <b>antibody fragment</b>    | 1892 | n.d. | 985  |
| <b>antibody fragment</b>    | 1998 | n.d. | 196  | 360  | 554  | 649  | 755  |
| <b>antibody fragment</b>    | 2174 | n.d. | 40   | n.d. | n.d. | n.d. | n.d. |
| <b>antibody fragment</b>    | 2207 | n.d. | 20   | n.d. | n.d. | n.d. | n.d. |
| <b>antibody fragment</b>    | 2331 | n.d. | 20   | 142  | 219  | 338  | 344  |
| <b>antibody fragment</b>    | 2508 | n.d. | 80   | 136  | 193  | 260  |
| <b>antibody fragment</b>    | 2819 | n.d. | 20   | 20   | 20   | 20   |
| <b>antibody fragment</b>    | 3336 | n.d. | 20   | 20   | 20   | 20   |

a) Imputed values necessary for optimized Gauss-fit are shown in red and are equal to the background intensity at the given m/z.

b) n.d.: value not determined / ion signal not present.

**Table S9.** Ion species, charge states, m/z values and intensities for anti-Troponin I antibody complexed with Troponin I peptide 7 at measured collision cell voltage differences. <sup>a,b)</sup>

peptide 7, measurement 1

| ion / charge state   | m/z     | $\Delta$ CV |       |       |       |       |       |       |       |       |       |       |       |       |
|----------------------|---------|-------------|-------|-------|-------|-------|-------|-------|-------|-------|-------|-------|-------|-------|
|                      |         | 2           | 4     | 6     | 8     | 12    | 16    | 20    | 30    | 40    | 50    | 60    | 70    | 80    |
| peptide dimer / 1+   | 3510.42 | 5           | 5     | 10    | 10    | 10    | 10    | 10    | 10    | 10    | 10    | 10    | 10    | 10    |
| peptide 6 / 1+       | 1755.71 | 8           | 10    | 11    | 11    | 14    | 16    | 25    | 54    | 191   | 248   | 292   | 411   | 311   |
| peptide 6 / 2+       | 878.47  | 106         | 171   | 585   | 1001  | 1915  | 3565  | 5325  | 10738 | 16102 | 20261 | 23692 | 25560 | 24250 |
| peptide 6 / 3+       | 585.98  | 128         | 384   | 629   | 879   | 1466  | 2646  | 3823  | 6138  | 8564  | 9678  | 10013 | 9786  | 8539  |
| peptide 6 / 4+       | 439.68  | 5           | 5     | 10    | 10    | 10    | 10    | 10    | 10    | 10    | 10    | 10    | 10    | 10    |
| antibody+0 pep / 29+ | 5048    | 50          | 50    | 50    | 50    | 50    | 50    | 50    | 50    | 50    | 50    | 50    | 50    | 50    |
| antibody+0 pep / 28+ | 5228    | 1277        | 2473  | 3461  | 4771  | 5381  | 5372  | 5798  | 5934  | 5740  | 5941  | 5671  | 5876  | 5606  |
| antibody+0 pep / 27+ | 5421    | 4647        | 8452  | 11526 | 14457 | 15670 | 16272 | 17236 | 17359 | 17481 | 18093 | 18032 | 18696 | 17965 |
| antibody+0 pep / 26+ | 5630    | 7117        | 12418 | 16519 | 19665 | 21288 | 21857 | 22960 | 23456 | 24013 | 25793 | 25641 | 26606 | 26086 |
| antibody+0 pep / 25+ | 5855    | 4976        | 8279  | 11124 | 12907 | 13845 | 14353 | 14930 | 15047 | 16368 | 17720 | 18236 | 18558 | 18671 |
| antibody+0 pep / 24+ | 6099    | 1781        | 2880  | 3977  | 4438  | 4710  | 5026  | 5115  | 5351  | 5868  | 6297  | 6670  | 6828  | 6939  |
| antibody+0 pep / 23+ | 6365    | 353         | 551   | 733   | 826   | 870   | 952   | 992   | 987   | 1211  | 1329  | 1487  | 1554  | 1654  |
| antibody+0 pep / 22+ | 6653    | 50          | 50    | 50    | 50    | 50    | 50    | 50    | 50    | 50    | 50    | 50    | 50    | 50    |
| antibody+1 pep/ 29+  | 5107    | 20          | 50    | 50    | 50    | 50    | 50    | 50    | 50    | 50    | 50    | 50    | 50    | 50    |
| antibody+1 pep/ 28+  | 5291    | 151         | 302   | 397   | 493   | 550   | 569   | 582   | 606   | 574   | 529   | 542   | 569   | 513   |
| antibody+1 pep/ 27+  | 5485    | 459         | 855   | 1107  | 1403  | 1392  | 1419  | 1474  | 1463  | 1449  | 1440  | 1445  | 1456  | 1406  |
| antibody+1 pep/ 26+  | 5698    | 622         | 1069  | 1408  | 1665  | 1686  | 1792  | 1808  | 1757  | 1779  | 1801  | 1839  | 1836  | 1833  |
| antibody+1 pep/ 25+  | 5923    | 409         | 698   | 884   | 974   | 1019  | 1037  | 1078  | 1041  | 1130  | 1107  | 1159  | 1168  | 1184  |
| antibody+1 pep/ 24+  | 6171    | 146         | 231   | 295   | 339   | 344   | 372   | 408   | 384   | 431   | 454   | 491   | 494   | 530   |
| antibody+1 pep/ 23+  | 6439    | 39          | 51    | 74    | 75    | 86    | 93    | 109   | 110   | 142   | 210   | 215   | 240   | 256   |
| antibody+1 pep/ 22+  | 6732    | 20          | 50    | 50    | 50    | 50    | 50    | 50    | 50    | 50    | 50    | 50    | 50    | 50    |
| antibody+2 peps/ 29+ | 5175    | 20          | 20    | 20    | 20    | 20    | 50    | 50    | 50    | 50    | 50    | 50    | 50    | 50    |
| antibody+2 peps/ 28+ | 5360    | 48          | 98    | 121   | 177   | 151   | 168   | 208   | 237   | 219   | 236   | 230   | 265   | 266   |
| antibody+2 peps/ 27+ | 5559    | 78          | 126   | 177   | 214   | 262   | 270   | 321   | 288   | 313   | 357   | 276   | 360   | 283   |
| antibody+2 peps/ 26+ | 5772    | 91          | 172   | 210   | 267   | 265   | 292   | 285   | 310   | 286   | 301   | 304   | 299   | 279   |
| antibody+2 peps/ 25+ | 6003    | 74          | 104   | 150   | 183   | 195   | 234   | 229   | 242   | 259   | 270   | 265   | 218   | 213   |
| antibody+2 peps/ 24+ | 6253    | 39          | 64    | 77    | 101   | 119   | 131   | 142   | 164   | 184   | 209   | 197   | 178   | 155   |

|                             |      |      |      |      |      |      |      |      |      |      |      |      |      |      |
|-----------------------------|------|------|------|------|------|------|------|------|------|------|------|------|------|------|
| <b>antibody+2 peps/ 23+</b> | 6525 | 16   | 22   | 34   | 40   | 45   | 51   | 72   | 83   | 95   | 106  | 117  | 102  | 91   |
| <b>antibody+2 peps/ 22+</b> | 6822 | 20   | 20   | 20   | 20   | 20   | 50   | 50   | 50   | 50   | 50   | 50   | 50   | 50   |
| <b>antibody fragment</b>    | 1000 | n.d. | 20   | 20   | 20   |
| <b>antibody fragment</b>    | 1200 | n.d. | 20   | 20   | 20   | 20   |
| <b>antibody fragment</b>    | 1324 | n.d. | 20   | 20   | 29   | 72   | 132  |
| <b>antibody fragment</b>    | 1471 | n.d. | 20   | 55   | 121  | 383  | 1046 |
| <b>antibody fragment</b>    | 1554 | n.d. | 79   | n.d. | n.d. | n.d. | n.d. |
| <b>antibody fragment</b>    | 1655 | n.d. | 232  | 713  | 1812 |
| <b>antibody fragment</b>    | 1751 | n.d. | 176  | 203  | 259  | n.d. | n.d. |
| <b>antibody fragment</b>    | 1892 | n.d. | 875  |
| <b>antibody fragment</b>    | 1998 | n.d. | 166  | 257  | 414  | 492  | 571  |
| <b>antibody fragment</b>    | 2331 | n.d. | 53   | 104  | 166  | 261  | 247  |
| <b>antibody fragment</b>    | 2391 | n.d. | 20   | n.d. | n.d. | n.d. | n.d. |
| <b>antibody fragment</b>    | 2508 | n.d. | 20   | 70   | 146  | 180  | 218  |
| <b>antibody fragment</b>    | 2819 | n.d. | 31   | 46   | 73   | 92   |
| <b>antibody fragment</b>    | 3336 | n.d. | 20   | 20   | 20   | 20   |
| <b>antibody fragment</b>    | 3461 | n.d. | 20   | 20   | 20   | 20   |

a) Imputed values necessary for optimized Gauss-fit are shown in red and are equal to the background intensity at the given m/z.

b) n.d.: value not determined / ion signal not present.

TableS 9. continued

peptide 7, measurement 2

| ion / charge state   | m/z     | $\Delta CV$ |       |       |       |       |       |       |       |       |       |       |       |       |
|----------------------|---------|-------------|-------|-------|-------|-------|-------|-------|-------|-------|-------|-------|-------|-------|
|                      |         | 2           | 4     | 6     | 8     | 12    | 16    | 20    | 30    | 40    | 50    | 60    | 70    | 80    |
| peptide dimer / 1+   | 3510.42 | 5           | 5     | 10    | 10    | 10    | 10    | 10    | 10    | 10    | 10    | 10    | 10    | 10    |
| peptide 6 / 1+       | 1755.71 | 9           | 7     | 13    | 16    | 12    | 21    | 30    | 78    | 183   | 230   | 252   | 340   | 334   |
| peptide 6 / 2+       | 878.47  | 54          | 78    | 168   | 225   | 297   | 423   | 714   | 928   | 1401  | 1471  | 1698  | 1956  | 2057  |
| peptide 6 / 3+       | 585.98  | 5           | 10    | 14    | 11    | 11    | 9     | 10    | 11    | 20    | 20    | 18    | 15    | 15    |
| peptide 6 / 4+       | 439.68  | 5           | 5     | 10    | 10    | 10    | 10    | 10    | 10    | 10    | 10    | 10    | 10    | 10    |
| antibody+0 pep / 29+ | 5048    | 50          | 50    | 50    | 50    | 50    | 50    | 50    | 50    | 50    | 50    | 50    | 50    | 50    |
| antibody+0 pep / 28+ | 5228    | 1774        | 2019  | 3007  | 3478  | 5023  | 5904  | 6948  | 6623  | 6763  | 6154  | 6758  | 7505  | 7708  |
| antibody+0 pep / 27+ | 5421    | 6016        | 7481  | 10474 | 11689 | 15422 | 17376 | 19777 | 19437 | 19944 | 19329 | 20150 | 22291 | 22874 |
| antibody+0 pep / 26+ | 5630    | 8754        | 11266 | 15336 | 16942 | 21160 | 23133 | 25513 | 26325 | 26873 | 27478 | 28226 | 30939 | 31509 |
| antibody+0 pep / 25+ | 5855    | 5846        | 7859  | 10893 | 11947 | 14153 | 14825 | 16007 | 17247 | 18140 | 19100 | 19596 | 21391 | 21293 |
| antibody+0 pep / 24+ | 6099    | 2123        | 2843  | 4021  | 4269  | 4966  | 5007  | 5363  | 5859  | 6507  | 7121  | 7202  | 7901  | 7696  |
| antibody+0 pep / 23+ | 6365    | 433         | 574   | 767   | 856   | 901   | 974   | 1056  | 1201  | 1296  | 1598  | 1610  | 1788  | 1786  |
| antibody+0 pep / 22+ | 6653    | 50          | 50    | 50    | 50    | 50    | 50    | 50    | 50    | 50    | 50    | 50    | 50    | 50    |
| antibody+1 pep/ 29+  | 5107    | 50          | 50    | 50    | 50    | 50    | 50    | 50    | 50    | 50    | 50    | 50    | 50    | 50    |
| antibody+1 pep/ 28+  | 5291    | 242         | 268   | 385   | 433   | 542   | 617   | 712   | 674   | 665   | 619   | 633   | 673   | 707   |
| antibody+1 pep/ 27+  | 5485    | 690         | 792   | 1061  | 1183  | 1463  | 1564  | 1709  | 1629  | 1652  | 1594  | 1626  | 1715  | 1740  |
| antibody+1 pep/ 26+  | 5698    | 807         | 996   | 1357  | 1459  | 1751  | 1864  | 2101  | 2020  | 2032  | 1981  | 1987  | 2108  | 2132  |
| antibody+1 pep/ 25+  | 5923    | 491         | 619   | 860   | 935   | 1080  | 1091  | 1180  | 1226  | 1219  | 1257  | 1236  | 1356  | 1363  |
| antibody+1 pep/ 24+  | 6171    | 191         | 248   | 347   | 356   | 385   | 403   | 440   | 465   | 465   | 506   | 526   | 573   | 567   |
| antibody+1 pep/ 23+  | 6439    | 50          | 64    | 94    | 87    | 87    | 92    | 120   | 152   | 193   | 233   | 244   | 325   | 351   |
| antibody+1 pep/ 22+  | 6732    | 50          | 50    | 50    | 50    | 50    | 50    | 50    | 50    | 50    | 50    | 50    | 50    | 50    |
| antibody+2 peps/ 29+ | 5175    | 20          | 20    | 20    | 20    | 50    | 50    | 50    | 50    | 50    | 50    | 50    | 50    | 50    |
| antibody+2 peps/ 28+ | 5360    | 92          | 122   | 119   | 149   | 195   | 239   | 276   | 291   | 236   | 248   | 254   | 342   | 294   |
| antibody+2 peps/ 27+ | 5559    | 125         | 147   | 172   | 180   | 280   | 319   | 322   | 373   | 314   | 341   | 382   | 394   | 415   |
| antibody+2 peps/ 26+ | 5772    | 137         | 169   | 201   | 230   | 279   | 303   | 355   | 363   | 329   | 331   | 323   | 323   | 296   |
| antibody+2 peps/ 25+ | 6003    | 87          | 117   | 159   | 189   | 198   | 238   | 248   | 283   | 275   | 281   | 288   | 267   | 239   |
| antibody+2 peps/ 24+ | 6253    | 53          | 67    | 85    | 100   | 108   | 138   | 149   | 181   | 190   | 213   | 224   | 203   | 190   |
| antibody+2 peps/ 23+ | 6525    | 23          | 33    | 36    | 36    | 49    | 62    | 70    | 96    | 111   | 139   | 138   | 101   | 115   |

|                             |      |      |      |      |      |      |      |      |      |      |      |      |      |      |
|-----------------------------|------|------|------|------|------|------|------|------|------|------|------|------|------|------|
| <b>antibody+2 peps/ 22+</b> | 6822 | 20   | 20   | 20   | 20   | 50   | 50   | 50   | 50   | 50   | 50   | 50   | 50   | 50   |
| <b>antibody fragment</b>    | 1000 | n.d. | 20   | 20   | 20   |
| <b>antibody fragment</b>    | 1200 | n.d. | 20   | 20   | 20   | 20   |
| <b>antibody fragment</b>    | 1324 | n.d. | 20   | 20   | n.d. | 83   | 306  |
| <b>antibody fragment</b>    | 1471 | n.d. | 20   | 62   | 167  | 599  | 1561 |
| <b>antibody fragment</b>    | 1554 | n.d. | 68   | 91   | n.d. | n.d. | n.d. |
| <b>antibody fragment</b>    | 1655 | n.d. | 264  | 969  | 2605 |
| <b>antibody fragment</b>    | 1751 | n.d. | 196  | 238  | n.d. | n.d. | n.d. |
| <b>antibody fragment</b>    | 1892 | n.d. | 1118 |
| <b>antibody fragment</b>    | 1998 | n.d. | 200  | 340  | 471  | 663  | 717  |
| <b>antibody fragment</b>    | 2006 | n.d. |
| <b>antibody fragment</b>    | 2160 | n.d. |
| <b>antibody fragment</b>    | 2174 | n.d. |
| <b>antibody fragment</b>    | 2331 | n.d. | 53   | 127  | 206  | 348  | 393  |
| <b>antibody fragment</b>    | 2391 | n.d. | 20   | n.d. | n.d. | n.d. | n.d. |
| <b>antibody fragment</b>    | 2508 | n.d. | 20   | 65   | 142  | 208  | 268  |
| <b>antibody fragment</b>    | 2819 | n.d. | 20   | 20   | 20   | 20   |
| <b>antibody fragment</b>    | 3336 | n.d. | 20   | 20   | 20   | 20   |

a) Imputed values necessary for optimized Gauss-fit are shown in red and are equal to the background intensity at the given m/z.

b) n.d.: value not determined / ion signal not present.



**TableS 10.** Apex heights of Gaussian fits of educt (antibody + 1 pep, antibody + 2 peps) and product (peptide, antibody + 0 pep, antibody fragments) ion signals upon gas phase dissociation of anti-Troponin antibody complexed with Troponin I peptide 1.

peptide 1, measurement 1

| ion                | $\Delta CV$ |         |         |         |         |         |         |         |         |         |         |
|--------------------|-------------|---------|---------|---------|---------|---------|---------|---------|---------|---------|---------|
|                    | 4           | 8       | 12      | 16      | 20      | 30      | 40      | 50      | 60      | 70      | 80      |
| peptide 1          | 20.08       | 119.14  | 293.63  | 508.05  | 871.15  | 2001.75 | 3311.92 | 4630.81 | 6625.84 | 7596.81 | 7863.30 |
| antibody + 0 pep   | 1560.65     | 3575.42 | 3758.80 | 4256.50 | 4473.02 | 4439.86 | 4974.13 | 5063.43 | 5422.00 | 5416.84 | 5446.53 |
| antibody + 1 pep   | 1759.65     | 3916.50 | 4101.82 | 4618.64 | 4751.23 | 4662.70 | 5000.77 | 5063.99 | 5274.46 | 5150.44 | 5142.85 |
| antibody + 2 peps  | 503.34      | 1128.70 | 1182.03 | 1319.88 | 1337.38 | 1274.14 | 1357.39 | 1323.64 | 1297.37 | 1255.40 | 1226.20 |
| antibody fragments |             |         |         |         |         |         | 84.43   | 129.34  | 238.72  | 386.95  | 892.07  |

peptide 1, measurement 2

| ion                | $\Delta CV$ |         |         |         |         |         |         |         |         |         |         |         |         |
|--------------------|-------------|---------|---------|---------|---------|---------|---------|---------|---------|---------|---------|---------|---------|
|                    | 2           | 4       | 6       | 8       | 12      | 16      | 20      | 30      | 40      | 50      | 60      | 70      | 80      |
| peptide 1          | 96.45       | 169.86  | 341.46  | 553.15  | 1127.69 | 1633.99 | 2119.96 | 3329.73 | 5913.23 | 7976.70 | 8716.03 | 9014.69 | 8888.83 |
| antibody + 0 pep   | 4665.54     | 4874.27 | 6454.31 | 7084.26 | 7245.07 | 8076.08 | 8040.37 | 7291.05 | 8150.62 | 7928.75 | 7617.47 | 7248.19 | 6968.70 |
| antibody + 1 pep   | 5960.01     | 6119.97 | 8196.73 | 8907.66 | 8937.94 | 9772.17 | 9650.46 | 8735.05 | 9185.97 | 8910.77 | 8505.97 | 7898.42 | 7476.38 |
| antibody + 2 peps  | 3500.50     | 3725.69 | 3745.14 | 3639.83 | 3664.84 | 3237.09 | 3116.27 | 2760.29 | 2850.01 | 2601.03 | 2419.74 | 2163.80 | 2062.89 |
| antibody fragments | 155.98      | 171.79  | 143.63  | 143.08  | 144.31  | 146.45  | 149.64  | 183.11  | 218.19  | 241.83  | 348.54  | 502.61  | 878.74  |

peptide 1, measurement 3

| ion                | $\Delta CV$ |         |         |         |         |         |         |         |         |         |          |          |          |
|--------------------|-------------|---------|---------|---------|---------|---------|---------|---------|---------|---------|----------|----------|----------|
|                    | 2           | 4       | 6       | 8       | 12      | 16      | 20      | 30      | 40      | 50      | 60       | 70       | 80       |
| peptide 1          | 107.65      | 175.05  | 239.32  | 361.03  | 1185.51 | 2082.29 | 2871.58 | 5104.50 | 7176.28 | 9711.76 | 11191.91 | 11049.64 | 11500.75 |
| antibody + 0 pep   | 3610.91     | 4106.76 | 4093.79 | 3793.54 | 3666.84 | 4989.85 | 4917.34 | 5237.32 | 5468.69 | 5774.38 | 5816.16  | 5484.61  | 5482.18  |
| antibody + 1 pep   | 6369.89     | 7203.19 | 7271.43 | 6881.29 | 6755.91 | 8591.76 | 8401.60 | 8891.83 | 9092.09 | 9159.76 | 9057.49  | 8495.29  | 8388.70  |
| antibody + 2 peps  | 3029.38     | 3322.47 | 3395.06 | 3287.11 | 3209.51 | 4041.04 | 3824.93 | 3885.75 | 3930.56 | 3721.37 | 3579.89  | 3323.28  | 3290.75  |
| antibody fragments | 163.30      | 160.88  | 195.73  | 193.71  | 209.48  | 204.66  | 211.02  | 249.91  | 283.28  | 320.68  | 402.37   | 485.29   | 817.47   |

peptide 1, measurement 4

| ion              | $\Delta CV$ |         |         |         |         |         |         |         |         |         |          |          |          |
|------------------|-------------|---------|---------|---------|---------|---------|---------|---------|---------|---------|----------|----------|----------|
|                  | 2           | 4       | 6       | 8       | 12      | 16      | 20      | 30      | 40      | 50      | 60       | 70       | 80       |
| peptide 1        | 79.46       | 129.86  | 220.19  | 331.56  | 592.87  | 1126.51 | 1794.14 | 3494.39 | 6229.77 | 7906.88 | 10190.94 | 10785.02 | 10900.22 |
| antibody + 0 pep | 2577.39     | 2084.74 | 2562.67 | 3133.06 | 2126.27 | 2574.86 | 3013.99 | 3299.68 | 3686.08 | 3570.43 | 3983.55  | 3877.92  | 3508.22  |

|                           |         |         |         |         |         |         |         |         |         |         |         |         |         |
|---------------------------|---------|---------|---------|---------|---------|---------|---------|---------|---------|---------|---------|---------|---------|
| <b>antibody + 1 pep</b>   | 4990.91 | 3920.54 | 4789.27 | 5935.94 | 3191.97 | 4279.29 | 5041.23 | 5604.53 | 6036.31 | 5795.18 | 6230.84 | 5920.06 | 5260.63 |
| <b>antibody + 2 peps</b>  | 2390.10 | 2260.39 | 2502.04 | 2956.83 | 2890.77 | 3082.27 | 3309.74 | 3322.14 | 3234.71 | 2860.98 | 2772.84 | 2582.03 | 2460.22 |
| <b>antibody fragments</b> | 146.27  | 127.62  | 150.38  | 169.75  | 108.82  | 132.48  | 149.26  | 161.50  | 196.50  | 224.44  | 272.53  | 294.48  | 381.09  |

Table S10. continued

peptide 1, measurement 5

| ion                       | $\Delta CV$ |          |          |          |          |          |          |          |          |          |          |          |          |
|---------------------------|-------------|----------|----------|----------|----------|----------|----------|----------|----------|----------|----------|----------|----------|
|                           | 2           | 4        | 6        | 8        | 12       | 16       | 20       | 30       | 40       | 50       | 60       | 70       | 80       |
| <b>peptide 1</b>          | 59.92       | 71.24    | 365.99   | 500.76   | 1187.91  | 2346.90  | 3548.31  | 7733.72  | 14640.64 | 23804.88 | 32021.49 | 35687.87 | 37275.38 |
| <b>antibody + 0 pep</b>   | 2153.10     | 5073.03  | 8253.94  | 11549.08 | 12682.79 | 12146.86 | 12729.48 | 12690.04 | 13795.51 | 14279.36 | 15455.43 | 15720.93 | 15269.13 |
| <b>antibody + 1 pep</b>   | 4194.19     | 10020.47 | 15862.35 | 21383.36 | 23344.51 | 22355.04 | 23464.29 | 23114.91 | 24077.02 | 24183.56 | 24835.56 | 24503.12 | 23972.25 |
| <b>antibody + 2 peps</b>  | 2130.05     | 5877.56  | 8298.35  | 10661.89 | 11678.62 | 10879.49 | 11300.24 | 11053.99 | 11149.52 | 10553.82 | 10340.26 | 10007.60 | 9432.65  |
| <b>antibody fragments</b> |             |          |          | 228.56   | 339.77   | 388.80   | 401.94   | 437.42   | 662.10   | 830.47   | 1016.15  | 1302.29  | 2405.83  |

peptide 1, measurement 6

| ion                       | $\Delta CV$ |         |          |          |          |          |          |          |          |          |          |          |          |
|---------------------------|-------------|---------|----------|----------|----------|----------|----------|----------|----------|----------|----------|----------|----------|
|                           | 2           | 4       | 6        | 8        | 12       | 16       | 20       | 30       | 40       | 50       | 60       | 70       | 80       |
| <b>peptide 1</b>          | 46.54       | 83.36   | 277.92   | 409.47   | 770.59   | 1810.89  | 2490.51  | 4835.50  | 7023.20  | 12953.05 | 15995.50 | 16925.50 | 23265.63 |
| <b>antibody + 0 pep</b>   | 2204.52     | 3711.92 | 6040.69  | 7467.20  | 7493.89  | 7863.29  | 6952.00  | 7675.22  | 6773.48  | 8463.87  | 8826.01  | 8464.64  | 10398.83 |
| <b>antibody + 1 pep</b>   | 4402.93     | 7355.58 | 11753.46 | 14327.94 | 14242.10 | 14720.60 | 13112.54 | 14465.88 | 12472.88 | 14530.21 | 14821.98 | 13758.94 | 16490.30 |
| <b>antibody + 2 peps</b>  | 2376.03     | 3906.83 | 6013.78  | 7165.67  | 7083.56  | 7210.92  | 6679.75  | 7119.46  | 6011.32  | 6354.74  | 6248.86  | 5673.43  | 6630.92  |
| <b>antibody fragments</b> |             |         | 69.95    | 283.44   | 330.04   | 375.42   | 330.13   | 406.57   | 405.53   | 537.26   | 726.44   | 827.38   | 2138.44  |

peptide 1, measurement 7

| ion                       | $\Delta CV$ |         |         |         |         |         |         |         |         |          |          |          |          |
|---------------------------|-------------|---------|---------|---------|---------|---------|---------|---------|---------|----------|----------|----------|----------|
|                           | 2           | 4       | 6       | 8       | 12      | 16      | 20      | 30      | 40      | 50       | 60       | 70       | 80       |
| <b>peptide 1</b>          | 80.36       | 121.00  | 214.07  | 262.32  | 611.72  | 1019.39 | 1811.31 | 3889.30 | 7485.65 | 10715.76 | 13510.41 | 13915.33 | 15378.52 |
| <b>antibody + 0 pep</b>   | 953.45      | 1773.11 | 1910.00 | 1875.47 | 2085.37 | 2148.65 | 2306.95 | 2828.24 | 3482.64 | 4095.57  | 4476.08  | 4291.64  | 4438.60  |
| <b>antibody + 1 pep</b>   | 2536.28     | 4637.87 | 4981.30 | 4888.84 | 5406.17 | 5557.34 | 5986.57 | 7113.10 | 8626.34 | 9822.22  | 10248.62 | 9807.44  | 10059.00 |
| <b>antibody + 2 peps</b>  | 1883.74     | 3252.71 | 3482.68 | 3387.91 | 3692.32 | 3788.77 | 4135.37 | 4835.10 | 5503.40 | 5916.61  | 6068.15  | 5637.94  | 5712.16  |
| <b>antibody fragments</b> |             |         |         |         |         |         |         |         | 130.36  | 259.06   | 371.75   | 686.85   | 1733.13  |

**Table S11.** Apex heights of Gaussian fits of educt (antibody + 1 pep, antibody + 2 peps) and product (peptide, antibody + 0 pep, antibody fragments) ion signals upon gas phase dissociation of anti-Troponin antibody complexed with Troponin I peptide 2.

peptide 2, measurement 1

| ion                       | $\Delta CV$ |         |         |         |         |         |         |          |          |          |          |
|---------------------------|-------------|---------|---------|---------|---------|---------|---------|----------|----------|----------|----------|
|                           | 4           | 8       | 12      | 16      | 20      | 30      | 40      | 50       | 60       | 70       | 80       |
| <b>peptide 2</b>          | 67.32       | 272.96  | 745.73  | 1388.48 | 2384.32 | 4942.70 | 7868.58 | 11421.31 | 16130.08 | 16754.08 | 16559.05 |
| <b>antibody + 0 pep</b>   | 698.69      | 1414.01 | 1809.11 | 1821.20 | 1913.65 | 2047.82 | 2326.51 | 2628.22  | 2969.89  | 3012.22  | 2972.78  |
| <b>antibody + 1 pep</b>   | 2691.94     | 5221.40 | 6974.64 | 7067.49 | 7404.73 | 7546.77 | 8270.46 | 8962.36  | 9745.20  | 9703.01  | 9440.08  |
| <b>antibody + 2 peps</b>  | 2741.97     | 5408.89 | 7151.47 | 7204.99 | 7362.56 | 7190.17 | 7441.11 | 7577.66  | 7832.33  | 7433.50  | 7249.24  |
| <b>antibody fragments</b> |             |         |         |         |         |         | 111.78  | 243.59   | 354.66   | 625.68   | 1459.47  |

peptide 2, measurement 2

| ion                       | $\Delta CV$ |         |         |         |         |         |         |         |         |         |         |         |         |
|---------------------------|-------------|---------|---------|---------|---------|---------|---------|---------|---------|---------|---------|---------|---------|
|                           | 2           | 4       | 6       | 8       | 12      | 16      | 20      | 30      | 40      | 50      | 60      | 70      | 80      |
| <b>peptide 2</b>          | 61.42       | 85.74   | 140.29  | 212.03  | 539.03  | 851.38  | 1250.97 | 2538.86 | 4306.85 | 6296.18 | 7286.95 | 7279.45 | 7211.32 |
| <b>antibody + 0 pep</b>   | 720.28      | 752.15  | 765.68  | 894.10  | 1208.53 | 1243.47 | 1240.94 | 1242.83 | 1384.99 | 1545.23 | 1611.08 | 1630.72 | 1662.12 |
| <b>antibody + 1 pep</b>   | 3135.11     | 3308.49 | 3452.27 | 3889.31 | 4994.14 | 4690.22 | 4898.72 | 4941.70 | 5175.84 | 5450.45 | 5471.25 | 5460.67 | 5404.46 |
| <b>antibody + 2 peps</b>  | 3447.11     | 3699.43 | 3736.50 | 4170.49 | 5101.90 | 5084.55 | 5188.74 | 5048.74 | 4962.00 | 4867.86 | 4685.46 | 4485.77 | 4311.65 |
| <b>antibody fragments</b> | 189.65      | 159.37  | 159.46  | 193.09  | 181.72  | 217.18  | 222.27  | 211.30  | 225.47  | 259.93  | 321.61  | 315.11  | 544.26  |

peptide 2, measurement 3

| ion                       | $\Delta CV$ |         |         |          |          |          |          |          |          |          |          |          |          |
|---------------------------|-------------|---------|---------|----------|----------|----------|----------|----------|----------|----------|----------|----------|----------|
|                           | 2           | 4       | 6       | 8        | 12       | 16       | 20       | 30       | 40       | 50       | 60       | 70       | 80       |
| <b>peptide 2</b>          | 75.36       | 119.78  | 373.02  | 683.26   | 1339.49  | 2171.34  | 3585.80  | 5329.01  | 7534.08  | 13267.31 | 14851.53 | 13811.11 | 13274.05 |
| <b>antibody + 0 pep</b>   | 1163.20     | 2163.44 | 3149.98 | 4407.09  | 4584.88  | 4375.83  | 4693.75  | 4403.64  | 4091.68  | 5266.26  | 5258.53  | 4826.02  | 4532.47  |
| <b>antibody + 1 pep</b>   | 3458.89     | 6614.82 | 9450.56 | 13064.70 | 13581.56 | 13273.45 | 13883.91 | 12759.23 | 11922.62 | 14281.29 | 13906.15 | 12650.65 | 11930.38 |
| <b>antibody + 2 peps</b>  | 2867.80     | 5545.20 | 7849.59 | 10225.38 | 10598.65 | 10300.09 | 10615.36 | 9610.27  | 9118.95  | 9870.41  | 9398.33  | 8472.70  | 7748.95  |
| <b>antibody fragments</b> |             |         |         | 233.22   | 294.98   | 310.36   | 319.06   | 358.52   | 508.63   | 670.21   | 847.50   | 1029.82  | 1809.85  |

peptide 2, measurement 4

| ion | $\Delta CV$ |
|-----|-------------|
|-----|-------------|

|                           | 2       | 4       | 6       | 8       | 12      | 16      | 20      | 30      | 40      | 50       | 60       | 70       | 80       |
|---------------------------|---------|---------|---------|---------|---------|---------|---------|---------|---------|----------|----------|----------|----------|
| <b>peptide 2</b>          | 118.13  | 262.60  | 401.18  | 645.28  | 1215.13 | 2114.87 | 3188.48 | 5142.21 | 7135.78 | 11011.90 | 13193.46 | 14682.41 | 14409.24 |
| <b>antibody + 0 pep</b>   | 1356.13 | 2347.45 | 2621.37 | 2938.35 | 3181.45 | 3238.23 | 3307.21 | 3391.51 | 3344.27 | 4148.28  | 4599.86  | 5046.02  | 4893.05  |
| <b>antibody + 1 pep</b>   | 4030.57 | 7013.31 | 7886.38 | 8922.16 | 9165.77 | 9270.26 | 9476.87 | 9301.31 | 9052.46 | 10581.18 | 11341.01 | 12067.88 | 11698.66 |
| <b>antibody + 2 peps</b>  | 3166.76 | 5484.63 | 6154.35 | 6942.65 | 6930.32 | 6913.07 | 7043.34 | 6663.19 | 6168.61 | 6844.71  | 7001.68  | 7489.76  | 7044.87  |
| <b>antibody fragments</b> |         |         |         |         |         |         |         |         | 150.50  | 286.41   | 333.68   | 780.56   | 1729.10  |

TableS 11. continued

peptide 2, measurement 5

| ion                       | $\Delta CV$ |         |         |         |         |          |          |          |          |          |          |          |          |
|---------------------------|-------------|---------|---------|---------|---------|----------|----------|----------|----------|----------|----------|----------|----------|
|                           | 2           | 4       | 6       | 8       | 12      | 16       | 20       | 30       | 40       | 50       | 60       | 70       | 80       |
| <b>peptide 2</b>          | 107.94      | 260.65  | 563.57  | 747.22  | 1457.09 | 2548.74  | 3867.28  | 7127.19  | 10581.41 | 12944.93 | 15118.79 | 15300.87 | 15535.78 |
| <b>antibody + 0 pep</b>   | 1442.12     | 2444.43 | 2840.65 | 3130.95 | 3318.49 | 3554.78  | 3673.69  | 4145.85  | 4423.75  | 4799.65  | 5027.63  | 5096.31  | 5057.08  |
| <b>antibody + 1 pep</b>   | 4274.93     | 7272.75 | 8503.97 | 9093.16 | 9796.27 | 10276.39 | 10482.53 | 11232.68 | 11625.11 | 12046.25 | 12331.09 | 12306.56 | 12220.36 |
| <b>antibody + 2 peps</b>  | 3353.98     | 5772.09 | 6534.41 | 7077.62 | 7465.36 | 7747.91  | 7685.50  | 7954.52  | 7893.10  | 7718.89  | 7623.79  | 7422.97  | 7325.98  |
| <b>antibody fragments</b> |             |         |         |         |         |          |          |          | 207.87   | 246.89   | 334.07   | 765.22   | 1761.00  |

**Table S12.** Apex heights of Gaussian fits of educt (antibody + 1 pep, antibody + 2 peps) and product (peptide, antibody + 0 pep, antibody fragments) ion signals upon gas phase dissociation of anti-Troponin antibody complexed with Troponin I peptide 3.

peptide 3, measurement 1

| ion                       | $\Delta CV$ |         |         |         |         |         |         |         |         |         |         |         |         |
|---------------------------|-------------|---------|---------|---------|---------|---------|---------|---------|---------|---------|---------|---------|---------|
|                           | 2           | 4       | 6       | 8       | 12      | 16      | 20      | 30      | 40      | 50      | 60      | 70      | 80      |
| <b>peptide 3</b>          | 127.80      | 210.60  | 471.46  | 598.94  | 763.98  | 736.50  | 822.71  | 1379.36 | 1787.62 | 3396.89 | 3956.39 | 3982.14 | 3666.04 |
| <b>antibody + 0 pep</b>   | 5572.53     | 7819.07 | 8968.55 | 9715.42 | 7514.15 | 5848.56 | 4630.12 | 4150.85 | 4336.47 | 6117.24 | 6443.00 | 6382.44 | 5939.89 |
| <b>antibody + 1 pep</b>   | 4784.00     | 6722.80 | 7638.97 | 8115.69 | 6098.48 | 4603.77 | 3658.41 | 3133.00 | 3213.90 | 4456.48 | 4487.35 | 4603.09 | 4139.07 |
| <b>antibody + 2 peps</b>  | 1126.65     | 1524.28 | 1810.22 | 1882.07 | 1406.97 | 999.21  | 781.77  | 689.62  | 664.45  | 862.53  | 848.91  | 832.21  | 758.47  |
| <b>antibody fragments</b> |             |         |         |         |         |         |         |         | 47.33   | 96.26   | 133.88  | 234.90  | 353.27  |

peptide 3, measurement 2

| ion                | $\Delta CV$ |         |         |         |         |         |         |         |         |         |         |         |         |
|--------------------|-------------|---------|---------|---------|---------|---------|---------|---------|---------|---------|---------|---------|---------|
|                    | 2           | 4       | 6       | 8       | 12      | 16      | 20      | 30      | 40      | 50      | 60      | 70      | 80      |
| peptide 3          | 40.86       | 68.14   | 130.53  | 179.51  | 369.97  | 727.05  | 1147.18 | 2021.24 | 3358.80 | 4636.93 | 5165.91 | 5497.45 | 5427.44 |
| antibody + 0 pep   | 2154.08     | 4421.98 | 4730.43 | 4912.19 | 5314.68 | 5718.53 | 5956.36 | 6466.79 | 7088.81 | 7905.70 | 8288.73 | 8347.55 | 8373.59 |
| antibody + 1 pep   | 1777.06     | 3671.93 | 4020.87 | 4049.20 | 4389.40 | 4585.24 | 4786.94 | 4943.51 | 5425.96 | 5760.50 | 5815.67 | 5898.36 | 5860.79 |
| antibody + 2 peps  | 434.85      | 843.62  | 900.03  | 898.80  | 972.63  | 1050.19 | 1041.74 | 1072.43 | 1112.97 | 1137.51 | 1108.60 | 1091.00 | 1107.54 |
| antibody fragments |             |         |         |         |         |         |         |         | 82.17   | 136.60  | 185.13  | 270.57  | 637.54  |

**Table S13.** Apex heights of Gaussian fits of educt (antibody + 1 pep, antibody + 2 peps) and product (peptide, antibody + 0 pep, antibody fragments) ion signals upon gas phase dissociation of anti-Troponin antibody complexed with Troponin I peptide 4.

peptide 4, measurement 1

| ion                | $\Delta CV$ |         |         |         |         |         |         |         |         |         |         |
|--------------------|-------------|---------|---------|---------|---------|---------|---------|---------|---------|---------|---------|
|                    | 4           | 8       | 12      | 16      | 20      | 30      | 40      | 50      | 60      | 70      | 80      |
| peptide 4          | 12.35       | 71.32   | 275.47  | 519.89  | 786.78  | 1067.65 | 1427.71 | 2275.65 | 3438.57 | 4377.29 | 4214.36 |
| antibody + 0 pep   | 689.27      | 2350.29 | 3336.85 | 3677.69 | 3553.81 | 2702.78 | 2703.53 | 2952.49 | 3649.82 | 4317.45 | 3925.67 |
| antibody + 1 pep   | 481.20      | 1810.64 | 2610.34 | 2800.55 | 2663.44 | 2128.39 | 1900.37 | 2052.10 | 2315.07 | 2651.67 | 2515.57 |
| antibody + 2 peps  | 99.35       | 397.24  | 567.26  | 619.98  | 611.17  | 493.80  | 392.68  | 404.33  | 407.44  | 462.70  | 420.41  |
| antibody fragments |             |         |         |         |         |         |         |         | 57.67   | 187.11  | 383.41  |

peptide 4, measurement 2

| ion                | $\Delta CV$ |         |         |         |         |         |         |         |          |         |         |          |         |
|--------------------|-------------|---------|---------|---------|---------|---------|---------|---------|----------|---------|---------|----------|---------|
|                    | 2           | 4       | 6       | 8       | 12      | 16      | 20      | 30      | 40       | 50      | 60      | 70       | 80      |
| peptide 4          | 43.85       | 116.14  | 348.54  | 461.60  | 885.50  | 1245.42 | 1704.68 | 3284.33 | 5095.10  | 4444.91 | 4837.05 | 6361.56  | 5310.18 |
| antibody + 0 pep   | 4082.12     | 5704.96 | 8663.47 | 8779.23 | 8584.55 | 8058.98 | 7915.14 | 9845.72 | 10846.74 | 8203.83 | 9050.89 | 11352.63 | 9321.16 |
| antibody + 1 pep   | 2710.41     | 3796.99 | 5367.58 | 5417.28 | 5214.46 | 4887.01 | 4975.12 | 5943.37 | 6337.56  | 4882.06 | 5166.05 | 6314.09  | 5222.44 |
| antibody + 2 peps  | 500.54      | 680.05  | 950.63  | 905.33  | 864.99  | 825.93  | 901.95  | 955.85  | 1042.39  | 812.07  | 851.29  | 938.04   | 813.50  |
| antibody fragments |             | 21.26   | 234.71  | 462.01  | 503.62  | 476.97  | 547.74  | 724.05  | 758.85   | 744.90  | 915.57  | 1402.37  | 1168.85 |

peptide 4, measurement 3

| ion                | $\Delta CV$ |         |         |         |         |         |         |         |         |         |         |         |         |
|--------------------|-------------|---------|---------|---------|---------|---------|---------|---------|---------|---------|---------|---------|---------|
|                    | 2           | 4       | 6       | 8       | 12      | 16      | 20      | 30      | 40      | 50      | 60      | 70      | 80      |
| peptide 4          | 39.74       | 101.53  | 205.50  | 355.82  | 698.73  | 1267.38 | 1749.89 | 1962.95 | 4597.21 | 5487.23 | 5613.29 | 5773.48 | 5491.09 |
| antibody + 0 pep   | 3221.50     | 4317.49 | 5471.52 | 5725.12 | 6308.73 | 7259.11 | 7385.92 | 7170.38 | 8893.43 | 9726.11 | 9541.32 | 9666.13 | 9406.18 |
| antibody + 1 pep   | 2291.55     | 3023.79 | 3696.25 | 3935.78 | 4255.45 | 4827.89 | 4794.27 | 4649.74 | 5476.13 | 5737.68 | 5636.00 | 5692.21 | 5434.54 |
| antibody + 2 peps  | 426.11      | 585.95  | 685.62  | 756.55  | 804.47  | 865.71  | 886.31  | 811.02  | 924.44  | 952.04  | 893.76  | 879.92  | 866.44  |
| antibody fragments |             | 41.83   | 224.23  | 399.90  | 418.18  | 471.03  | 577.63  | 579.57  | 745.81  | 839.11  | 903.54  | 882.63  | 1213.13 |

peptide 4, measurement 4

| ion | $\Delta CV$ |
|-----|-------------|
|-----|-------------|

|                           | 2       | 4       | 6       | 8       | 12      | 16      | 20      | 30       | 40       | 50       | 60       | 70       | 80       |
|---------------------------|---------|---------|---------|---------|---------|---------|---------|----------|----------|----------|----------|----------|----------|
| <b>peptide 4</b>          | 8.81    | 25.45   | 53.34   | 74.12   | 247.59  | 502.29  | 750.10  | 2352.37  | 4501.47  | 6128.32  | 6595.08  | 6774.57  | 7162.90  |
| <b>antibody + 0 pep</b>   | 1467.98 | 2275.16 | 3331.92 | 4299.10 | 5156.87 | 6657.81 | 7202.47 | 10338.77 | 14380.17 | 16317.63 | 17098.91 | 17253.87 | 18696.39 |
| <b>antibody + 1 pep</b>   | 694.89  | 1080.28 | 1550.16 | 1919.91 | 2240.81 | 2768.08 | 2988.82 | 4011.55  | 5176.95  | 5617.03  | 5711.35  | 5631.24  | 5908.71  |
| <b>antibody + 2 peps</b>  | 131.95  | 209.02  | 296.38  | 348.73  | 374.88  | 456.51  | 468.15  | 537.92   | 654.67   | 658.83   | 617.85   | 592.17   | 615.62   |
| <b>antibody fragments</b> |         |         |         |         |         |         |         |          | 123.69   | 272.75   | 476.32   | 747.32   | 1496.83  |

TableS 13. continued

peptide 4, measurement 5

| ion                       | $\Delta CV$ |         |          |          |          |          |          |          |          |          |          |          |          |
|---------------------------|-------------|---------|----------|----------|----------|----------|----------|----------|----------|----------|----------|----------|----------|
|                           | 2           | 4       | 6        | 8        | 12       | 16       | 20       | 30       | 40       | 50       | 60       | 70       | 80       |
| <b>peptide 4</b>          | 77.06       | 246.54  | 564.32   | 809.08   | 1735.19  | 3056.89  | 4368.54  | 7996.18  | 11071.47 | 14368.06 | 14958.92 | 14384.83 | 15056.73 |
| <b>antibody + 0 pep</b>   | 5820.1      | 9904.2  | 13066.72 | 14722.52 | 17593.71 | 20580.31 | 21959.07 | 24802.77 | 27558.79 | 29767.54 | 29863.47 | 29275.86 | 29247.61 |
| <b>antibody + 1 pep</b>   | 2355.0      | 3899.03 | 5054.05  | 5693.11  | 6534.33  | 7393.57  | 7722.78  | 8113.89  | 8546.03  | 8884.76  | 8525.26  | 8013.85  | 7994.48  |
| <b>antibody + 2 peps</b>  | 326.54      | 542.15  | 682.13   | 749.06   | 877.88   | 949.86   | 984.13   | 1022.67  | 956.12   | 1007.27  | 944.75   | 840.10   | 849.14   |
| <b>antibody fragments</b> |             |         |          |          |          |          |          | 120.81   | 283.42   | 517.38   | 643.54   | 1286.32  | 2759.89  |

**Table S14.** Apex heights of Gaussian fits of educt (antibody + 1 pep, antibody + 2 peps) and product (peptide, antibody + 0 pep, antibody fragments) ion signals upon gas phase dissociation of anti-Troponin antibody complexed with Troponin I peptide 5.

peptide 5, measurement 1

| ion                       | $\Delta CV$ |         |         |         |         |         |         |         |         |          |          |          |          |
|---------------------------|-------------|---------|---------|---------|---------|---------|---------|---------|---------|----------|----------|----------|----------|
|                           | 2           | 4       | 6       | 8       | 12      | 16      | 20      | 30      | 40      | 50       | 60       | 70       | 80       |
| <b>peptide 5</b>          | 173.60      | 219.33  | 575.94  | 587.69  | 969.99  | 1532.19 | 2115.3  | 4130.77 | 7429.81 | 11878.90 | 12870.10 | 13025.40 | 12820.70 |
| <b>antibody + 0 pep</b>   | 6774.08     | 8138.97 | 6794.22 | 8716.95 | 8712.91 | 8624.20 | 7875.23 | 9182.34 | 9660.95 | 10600.30 | 10547.50 | 10658.10 | 10591.70 |
| <b>antibody + 1 pep</b>   | 7774.92     | 8814.28 | 7944.37 | 9301.92 | 9151.57 | 8990.23 | 8528.78 | 9286.09 | 9383.04 | 9829.60  | 9500.34  | 9525.96  | 9160.70  |
| <b>antibody + 2 peps</b>  | 2607.51     | 2715.78 | 2960.88 | 2805.92 | 2713.30 | 2614.45 | 2689.78 | 2680.87 | 2625.27 | 2540.91  | 2444.44  | 2340.81  | 2228.29  |
| <b>antibody fragments</b> | 152.37      | 162.16  | 156.93  | 169.41  | 195.33  | 195.14  | 201.33  | 210.55  | 213.33  | 155.50   | 408.77   | 644.78   | 746.06   |

peptide 5, measurement 2

| ion                       | $\Delta CV$ |          |          |          |          |          |          |          |          |          |          |          |          |
|---------------------------|-------------|----------|----------|----------|----------|----------|----------|----------|----------|----------|----------|----------|----------|
|                           | 2           | 4        | 6        | 8        | 12       | 16       | 20       | 30       | 40       | 50       | 60       | 70       | 80       |
| <b>peptide 5</b>          | 274.00      | 452.86   | 662.57   | 1051.60  | 1965.64  | 3326.04  | 4363.99  | 7449.64  | 13411.07 | 20837.00 | 23602.75 | 23515.07 | 22713.11 |
| <b>antibody + 0 pep</b>   | 10628.19    | 12223.25 | 12568.23 | 12283.48 | 12592.41 | 13135.95 | 12658.92 | 13444.59 | 14063.35 | 15101.71 | 15532.94 | 14660.18 | 14180.30 |
| <b>antibody + 1 pep</b>   | 13122.70    | 13862.76 | 14002.30 | 13744.45 | 14299.13 | 14423.02 | 14262.00 | 14461.96 | 14795.60 | 15011.87 | 15055.22 | 14305.58 | 13777.57 |
| <b>antibody + 2 peps</b>  | 4591.07     | 4472.59  | 4277.14  | 4449.99  | 4565.32  | 4664.72  | 4554.31  | 4550.43  | 4455.35  | 4231.48  | 4149.56  | 3862.86  | 3797.89  |
| <b>antibody fragments</b> | 205.99      | 194.26   | 213.23   | 228.46   | 263.88   | 254.81   | 261.38   | 324.79   | 360.69   | 406.01   | 425.16   | 567.47   | 694.52   |



Table S14. continued

peptide 5, measurement 3

| ion                | $\Delta CV$ |          |          |          |          |          |          |          |          |          |          |          |          |
|--------------------|-------------|----------|----------|----------|----------|----------|----------|----------|----------|----------|----------|----------|----------|
|                    | 2           | 4        | 6        | 8        | 12       | 16       | 20       | 30       | 40       | 50       | 60       | 70       | 80       |
| peptide 5          | 251.26      | 308.70   | 553.58   | 833.65   | 1586.26  | 2755.06  | 4068.58  | 6756.54  | 12347.70 | 19441.40 | 22465.50 | 22602.10 | 22745.90 |
| antibody + 0 pep   | 8233.91     | 8852.90  | 9913.13  | 9868.38  | 10109.40 | 11041.50 | 11641.30 | 12116.30 | 12807.00 | 14181.40 | 15107.40 | 15154.40 | 15429.50 |
| antibody + 1 pep   | 10431       | 10908.40 | 11775.10 | 12005.60 | 12053.40 | 12500.90 | 13011.80 | 13278.60 | 13541.90 | 13931.60 | 14143.30 | 14059    | 14137.30 |
| antibody + 2 peps  | 3754.60     | 3912.04  | 4009.24  | 4188.21  | 4166.93  | 4065.86  | 4107.91  | 4170.46  | 4131.57  | 3851.66  | 3729.81  | 3603.88  | 3625.49  |
| antibody fragments | 160.19      | 168.64   | 178.42   | 194.78   | 199.09   | 200.36   | 202.00   | 249.66   | 315.62   | 389.36   | 466.12   | 576.20   | 710.33   |

peptide 5, measurement 4

| ion                | $\Delta CV$ |         |         |         |         |         |         |         |          |          |          |          |          |
|--------------------|-------------|---------|---------|---------|---------|---------|---------|---------|----------|----------|----------|----------|----------|
|                    | 2           | 4       | 6       | 8       | 12      | 16      | 20      | 30      | 40       | 50       | 60       | 70       | 80       |
| peptide 5          | 16.47       | 59.32   | 158.35  | 419.73  | 623.67  | 1519.09 | 2668.73 | 3571.74 | 5936.14  | 8307.26  | 10383.00 | 11281.20 | 11709.41 |
| antibody + 0 pep   | 862.83      | 2401.41 | 4010.64 | 5912.64 | 6965.60 | 8651.88 | 9776.39 | 9804.21 | 10539.09 | 11018.25 | 12046.10 | 12616.59 | 12974.22 |
| antibody + 1 pep   | 759.32      | 1982.27 | 3279.28 | 4846.22 | 5639.33 | 6875.38 | 7684.97 | 7507.48 | 7800.15  | 7748.14  | 8289.69  | 8377.27  | 8382.97  |
| antibody + 2 peps  | 178.93      | 474.09  | 752.97  | 1133.43 | 1319.68 | 1513.15 | 1672.59 | 1626.81 | 1621.45  | 1555.63  | 1540.89  | 1536.30  | 1500.03  |
| antibody fragments |             |         |         |         |         |         |         |         | 153.26   | 247.51   | 332.24   | 503.26   | 1367.15  |

peptide 5, measurement 5

| ion                | $\Delta CV$ |         |         |         |         |         |          |         |         |         |          |          |          |
|--------------------|-------------|---------|---------|---------|---------|---------|----------|---------|---------|---------|----------|----------|----------|
|                    | 2           | 4       | 6       | 8       | 12      | 16      | 20       | 30      | 40      | 50      | 60       | 70       | 80       |
| peptide 5          | 41.34       | 91.23   | 329.77  | 595.19  | 971.02  | 1784.46 | 3016.55  | 2658.60 | 2904.47 | 4995.02 | 7987.69  | 11850.28 | 13306.11 |
| antibody + 0 pep   | 1581.10     | 3676.32 | 5790.62 | 7783.78 | 8749.01 | 9760.17 | 10739.63 | 8686.45 | 7466.76 | 8665.00 | 10686.65 | 13434.12 | 14479.16 |
| antibody + 1 pep   | 1274.03     | 2931.58 | 4788.01 | 6355.17 | 6973.55 | 7653.81 | 8246.83  | 6656.40 | 5759.21 | 6339.64 | 7504.16  | 8960.89  | 9403.25  |
| antibody + 2 peps  | 288.62      | 676.66  | 1105.89 | 1413.21 | 1572.74 | 1675.90 | 1778.90  | 1462.09 | 1190.97 | 1265.90 | 1402.58  | 1614.35  | 1675.85  |
| antibody fragments |             |         |         |         |         |         |          |         | 108.40  | 185.64  | 337.77   | 493.44   | 1709.46  |

**Table S15.** Apex heights of Gaussian fits of educt (antibody + 1 pep, antibody + 2 peps) and product (peptide, antibody + 0 pep, antibody fragments) ion signals upon gas phase dissociation of anti-Troponin antibody complexed with Troponin I peptide 6.

peptide 6, measurement 1

| ion                | $\Delta CV$ |         |         |         |         |         |         |         |          |          |          |
|--------------------|-------------|---------|---------|---------|---------|---------|---------|---------|----------|----------|----------|
|                    | 4           | 8       | 12      | 16      | 20      | 30      | 40      | 50      | 60       | 70       | 80       |
| peptide 6          | 161.71      | 363.88  | 754.95  | 1429.08 | 2621.11 | 4287.09 | 7028.12 | 8857.59 | 13064.58 | 15271.41 | 13482.67 |
| antibody + 0 pep   | 2404.74     | 5143.09 | 4552.27 | 5629.39 | 7617.65 | 7156.95 | 7653.22 | 6759.93 | 8812.03  | 9183.83  | 8890.92  |
| antibody + 1 pep   | 2752.61     | 5850.26 | 5815.58 | 6419.71 | 7702.72 | 7053.72 | 7099.32 | 6252.03 | 7288.72  | 7608.71  | 7042.60  |
| antibody + 2 peps  | 935.94      | 1998.53 | 2111.50 | 2049.80 | 2132.50 | 1951.60 | 1850.22 | 1673.96 | 1594.65  | 1625.04  | 1488.90  |
| antibody fragments |             |         |         |         |         |         | 142.29  | 182.02  | 409.28   | 1075.05  | 2331.77  |

peptide 6, measurement 2

| ion                | $\Delta CV$ |         |         |         |         |         |         |         |          |         |         |
|--------------------|-------------|---------|---------|---------|---------|---------|---------|---------|----------|---------|---------|
|                    | 4           | 8       | 12      | 16      | 20      | 30      | 40      | 50      | 60       | 70      | 80      |
| peptide 6          | 32.59       | 139.45  | 317.28  | 681.44  | 1130.44 | 1526.55 | 4110.76 | 6296.58 | 10022.93 | 9926.29 | 9897.90 |
| antibody + 0 pep   | 1429.6      | 3282.31 | 3340.73 | 3468.37 | 3429.15 | 3745.02 | 4525.63 | 4867.97 | 5215.11  | 5390.13 | 5282.73 |
| antibody + 1 pep   | 1498.96     | 3428.99 | 3598.41 | 3826.56 | 3944.94 | 3903.71 | 4236.53 | 4329.18 | 4446.62  | 4506.29 | 4302.57 |
| antibody + 2 peps  | 633.73      | 1474.36 | 1499.41 | 1612.58 | 1965.36 | 1397.88 | 1192.31 | 1217.47 | 1157.82  | 1116.02 | 1003.86 |
| antibody fragments |             | 64.71   | 49.42   | 48.66   | 59.68   | 46.59   | 49.70   | 105.37  | 184.18   | 371.44  | 623.81  |

peptide 6, measurement 3

| ion                | $\Delta CV$ |         |         |         |         |          |          |          |          |          |          |          |          |
|--------------------|-------------|---------|---------|---------|---------|----------|----------|----------|----------|----------|----------|----------|----------|
|                    | 2           | 4       | 6       | 8       | 12      | 16       | 20       | 30       | 40       | 50       | 60       | 70       | 80       |
| peptide 6          | 81.61       | 184.36  | 440.28  | 719.96  | 1714.80 | 3270.41  | 5249.41  | 9217.45  | 13902.38 | 28227.48 | 36243.18 | 43029.33 | 40402.45 |
| antibody + 0 pep   | 2846.52     | 5051.41 | 6367.78 | 7747.68 | 9748.35 | 11484.79 | 12175.65 | 13557.85 | 15045.71 | 20475.44 | 21959.70 | 21867.54 | 21486.33 |
| antibody + 1 pep   | 2851.01     | 5151.50 | 6336.65 | 7645.63 | 9478.69 | 11046.44 | 11472.97 | 12091.59 | 12691.32 | 14899.34 | 15283.39 | 14649.37 | 14059.47 |
| antibody + 2 peps  | 777.53      | 1396.59 | 1687.42 | 2088.71 | 2448.87 | 2814.97  | 2849.73  | 2854.19  | 2843.57  | 2953.50  | 2846.46  | 2720.04  | 2496.47  |
| antibody fragments |             |         |         |         |         |          |          |          | 260.73   | 503.68   | 695.45   | 1284.29  | 2912.22  |

peptide 6, measurement 4

| ion | $\Delta CV$ |
|-----|-------------|
|-----|-------------|

|                               | 2       | 4       | 6       | 8       | 12      | 16       | 20       | 30       | 40       | 50       | 60       | 70       | 80       |
|-------------------------------|---------|---------|---------|---------|---------|----------|----------|----------|----------|----------|----------|----------|----------|
| <b>peptide 6</b>              | 139.79  | 363.84  | 790.27  | 1107.26 | 2091.23 | 3889.96  | 5793.61  | 11460.78 | 17046.97 | 19315.68 | 22863.83 | 24783.70 | 23669.68 |
| <b>antibody + 0 pep</b>       | 3650.01 | 5082.74 | 6842.96 | 8502.73 | 9728.51 | 11267.56 | 11949.41 | 13463.75 | 15501.74 | 16368.28 | 17388.78 | 17264.31 | 16006.27 |
| <b>antibody + 1 pep</b>       | 3481.40 | 4777.05 | 6550.54 | 7930.91 | 9012.60 | 9916.36  | 10401.21 | 11228.29 | 11834.38 | 12079.90 | 12040.30 | 12001.19 | 10948.70 |
| <b>antibody + 2 peps</b>      | 918.89  | 1346.66 | 1750.96 | 2110.07 | 2270.20 | 2483.84  | 2572.87  | 2598.82  | 2486.08  | 2408.69  | 2314.95  | 2172.60  | 2016.49  |
| <b>antibody<br/>fragments</b> |         |         |         |         |         |          |          |          | 232.87   | 352.02   | 518.85   | 932.71   | 1992.49  |

**Table S16.** Apex heights of Gaussian fits of educt (antibody + 1 pep, antibody + 2 peps) and product (peptide, antibody + 0 pep, antibody fragments) ion signals upon gas phase dissociation of anti-Troponin antibody complexed with Troponin I peptide 7.

peptide 7, measurement 1

| ion                | $\Delta CV$ |         |          |          |          |          |          |          |          |          |          |          |          |
|--------------------|-------------|---------|----------|----------|----------|----------|----------|----------|----------|----------|----------|----------|----------|
|                    | 2           | 4       | 6        | 8        | 12       | 16       | 20       | 30       | 40       | 50       | 60       | 70       | 80       |
| peptide 7          | 16.99       | 49.56   | 103.40   | 176.28   | 266.30   | 393.96   | 552.58   | 792.59   | 1057.89  | 1304.28  | 1357.71  | 1339.85  | 1437.95  |
| antibody + 0 pep   | 7095.2      | 12380.7 | 16551.63 | 19823.82 | 21433.30 | 22070.35 | 23205.89 | 23545.16 | 24220.71 | 25871.93 | 25867.30 | 26712.96 | 26201.44 |
| antibody + 1 pep   | 610.02      | 1065.06 | 1396.58  | 1682.05  | 1691.84  | 1765.41  | 1791.45  | 1749.91  | 1760.06  | 1740.46  | 1769.42  | 1762.40  | 1739.84  |
| antibody + 2 peps  | 78.12       | 144.81  | 194.36   | 247.32   | 263.17   | 267.77   | 269.82   | 277.68   | 275.29   | 301.92   | 287.54   | 274.62   | 245.05   |
| antibody fragments |             |         |          |          |          |          |          |          | 184.80   | 241.73   | 376.19   | 736.80   | 1769.88  |

peptide 7, measurement 2

| ion                | $\Delta CV$ |         |          |          |          |          |          |          |          |          |          |          |          |
|--------------------|-------------|---------|----------|----------|----------|----------|----------|----------|----------|----------|----------|----------|----------|
|                    | 2           | 4       | 6        | 8        | 12       | 16       | 20       | 30       | 40       | 50       | 60       | 70       | 80       |
| peptide 7          | 48.50       | 72.33   | 159.67   | 217.77   | 293.98   | 419.61   | 714.04   | 897.91   | 1307.56  | 1345.92  | 1565.66  | 1770.27  | 1879.02  |
| antibody + 0 pep   | 8702.3      | 11268.0 | 15448.70 | 17073.10 | 21349.07 | 23349.93 | 25869.88 | 26524.97 | 27168.09 | 27553.58 | 28365.05 | 31106.27 | 31622.05 |
| antibody + 1 pep   | 795.91      | 968.86  | 1323.24  | 1450.15  | 1766.16  | 1871.28  | 2078.52  | 1989.34  | 1991.19  | 1925.86  | 1926.95  | 2028.19  | 2044.45  |
| antibody + 2 peps  | 121.99      | 152.52  | 190.79   | 221.87   | 257.56   | 290.72   | 320.74   | 341.03   | 302.44   | 299.68   | 324.52   | 325.20   | 400.00   |
| antibody fragments |             |         |          |          |          |          |          |          | 193.79   | 324.57   | 448.49   | 1009.33  | 2534.65  |

**Table S17.** Mean charge states of educt ion signals upon gas phase dissociation of anti-Troponin antibody complexed with Troponin I peptide 1.

peptide 1, measurement 1

| ion                      | $\Delta CV$ |       |       |       |       |       |       |       |       |       |
|--------------------------|-------------|-------|-------|-------|-------|-------|-------|-------|-------|-------|
|                          | 4           | 8     | 12    | 16    | 20    | 30    | 40    | 60    | 70    | 80    |
| <b>antibody + 1 pep</b>  | 24.18       | 24.17 | 24.11 | 24.17 | 24.19 | 24.14 | 24.12 | 24.08 | 24.07 | 24.07 |
| <b>antibody + 2 peps</b> | 24.45       | 24.43 | 24.36 | 24.43 | 24.42 | 24.41 | 24.37 | 24.37 | 24.31 | 24.37 |

peptide 1, measurement 2

| ion                      | $\Delta CV$ |       |       |       |       |       |       |       |       |       |       |       |       |
|--------------------------|-------------|-------|-------|-------|-------|-------|-------|-------|-------|-------|-------|-------|-------|
|                          | 2           | 4     | 6     | 8     | 12    | 16    | 20    | 30    | 40    | 50    | 60    | 70    | 80    |
| <b>antibody + 1 pep</b>  | 25.82       | 25.80 | 26.08 | 26.13 | 26.11 | 26.13 | 26.09 | 25.90 | 25.95 | 25.78 | 25.67 | 25.65 | 25.63 |
| <b>antibody + 2 peps</b> | 25.87       | 25.85 | 26.13 | 26.21 | 26.22 | 26.30 | 26.28 | 26.12 | 26.16 | 26.03 | 25.95 | 25.94 | 25.91 |

peptide 1, measurement 3

| ion                      | $\Delta CV$ |       |       |       |       |       |       |       |       |       |       |       |       |
|--------------------------|-------------|-------|-------|-------|-------|-------|-------|-------|-------|-------|-------|-------|-------|
|                          | 2           | 4     | 6     | 8     | 12    | 16    | 20    | 30    | 40    | 50    | 60    | 70    | 80    |
| <b>antibody + 1 pep</b>  | 25.88       | 25.95 | 25.89 | 25.77 | 25.72 | 25.95 | 25.89 | 25.80 | 25.72 | 25.69 | 25.62 | 25.60 | 25.56 |
| <b>antibody + 2 peps</b> | 26.08       | 26.12 | 26.08 | 25.96 | 25.92 | 26.15 | 26.10 | 26.03 | 25.95 | 25.93 | 25.89 | 25.90 | 25.86 |

peptide 1, measurement 4

| ion                      | $\Delta CV$ |       |       |       |       |       |       |       |       |       |       |       |       |
|--------------------------|-------------|-------|-------|-------|-------|-------|-------|-------|-------|-------|-------|-------|-------|
|                          | 2           | 4     | 6     | 8     | 12    | 16    | 20    | 30    | 40    | 50    | 60    | 70    | 80    |
| <b>antibody + 1 pep</b>  | 25.72       | 25.72 | 25.72 | 25.71 | 25.68 | 25.83 | 25.87 | 25.90 | 25.89 | 25.70 | 25.68 | 25.70 | 25.66 |
| <b>antibody + 2 peps</b> | 25.94       | 25.94 | 25.94 | 25.90 | 25.82 | 25.93 | 25.99 | 26.03 | 26.03 | 25.89 | 25.88 | 25.92 | 25.84 |

peptide 1, measurement 5

| ion                      | $\Delta CV$ |       |       |       |       |       |       |       |       |       |       |       |       |
|--------------------------|-------------|-------|-------|-------|-------|-------|-------|-------|-------|-------|-------|-------|-------|
|                          | 2           | 4     | 6     | 8     | 12    | 16    | 20    | 30    | 40    | 50    | 60    | 70    | 80    |
| <b>antibody + 1 pep</b>  | 24.55       | 24.47 | 24.47 | 24.56 | 24.59 | 24.54 | 24.61 | 24.56 | 24.57 | 24.53 | 24.49 | 24.51 | 24.50 |
| <b>antibody + 2 peps</b> | 24.79       | 24.74 | 24.75 | 24.82 | 24.83 | 24.79 | 24.86 | 24.81 | 24.85 | 24.81 | 24.81 | 24.84 | 24.84 |

peptide 1, measurement 6

| ion                      | $\Delta CV$ |       |       |       |       |       |       |       |       |       |       |       |       |
|--------------------------|-------------|-------|-------|-------|-------|-------|-------|-------|-------|-------|-------|-------|-------|
|                          | 2           | 4     | 6     | 8     | 12    | 16    | 20    | 30    | 40    | 50    | 60    | 70    | 80    |
| <b>antibody + 1 pep</b>  | 24.67       | 24.57 | 24.67 | 24.72 | 24.67 | 24.67 | 24.71 | 24.70 | 24.60 | 24.66 | 24.57 | 24.55 | 24.63 |
| <b>antibody + 2 peps</b> | 24.90       | 24.84 | 24.93 | 24.97 | 24.91 | 24.90 | 24.94 | 24.94 | 24.89 | 24.92 | 24.87 | 24.89 | 24.97 |

peptide 1, measurement 7

| ion                      | $\Delta CV$ |       |       |       |       |       |       |       |       |       |       |       |       |
|--------------------------|-------------|-------|-------|-------|-------|-------|-------|-------|-------|-------|-------|-------|-------|
|                          | 2           | 4     | 6     | 8     | 12    | 16    | 20    | 30    | 40    | 50    | 60    | 70    | 80    |
| <b>antibody + 1 pep</b>  | 25.38       | 25.40 | 25.40 | 25.34 | 25.32 | 25.35 | 25.32 | 25.31 | 25.28 | 25.26 | 25.19 | 25.18 | 25.19 |
| <b>antibody + 2 peps</b> | 25.61       | 25.69 | 25.65 | 25.61 | 25.61 | 25.63 | 25.62 | 25.61 | 25.61 | 25.61 | 25.61 | 25.60 | 25.62 |

**Table S18.** Mean charge states of educt ion signals upon gas phase dissociation of anti-Troponin antibody complexed with Troponin I peptide 2.

peptide 2, measurement 1

| ion                      | $\Delta CV$ |       |       |       |       |       |       |       |       |       |       |
|--------------------------|-------------|-------|-------|-------|-------|-------|-------|-------|-------|-------|-------|
|                          | 4           | 8     | 12    | 16    | 20    | 30    | 40    | 50    | 60    | 70    | 80    |
| <b>antibody + 1 pep</b>  | 24.07       | 24.17 | 24.20 | 24.14 | 24.19 | 24.10 | 24.10 | 24.11 | 24.05 | 23.99 | 24.01 |
| <b>antibody + 2 peps</b> | 24.28       | 24.39 | 24.41 | 24.38 | 24.43 | 24.36 | 24.38 | 24.40 | 24.37 | 24.34 | 24.35 |

peptide 2, measurement 2

| ion                      | $\Delta CV$ |       |       |       |       |       |       |       |       |       |       |       |       |
|--------------------------|-------------|-------|-------|-------|-------|-------|-------|-------|-------|-------|-------|-------|-------|
|                          | 2           | 4     | 6     | 8     | 12    | 16    | 20    | 30    | 40    | 50    | 60    | 70    | 80    |
| <b>antibody + 1 pep</b>  | 25.99       | 25.98 | 25.98 | 26.06 | 26.13 | 26.10 | 26.07 | 25.99 | 25.92 | 25.82 | 25.74 | 25.71 | 25.70 |
| <b>antibody + 2 peps</b> | 26.19       | 26.18 | 26.18 | 26.23 | 26.33 | 26.32 | 26.28 | 26.27 | 26.23 | 26.17 | 26.11 | 26.10 | 26.11 |

peptide 2, measurement 3

| ion                      | $\Delta CV$ |       |       |       |       |       |       |       |       |       |       |       |       |
|--------------------------|-------------|-------|-------|-------|-------|-------|-------|-------|-------|-------|-------|-------|-------|
|                          | 2           | 4     | 6     | 8     | 12    | 16    | 20    | 30    | 40    | 50    | 60    | 70    | 80    |
| <b>antibody + 1 pep</b>  | 24.95       | 24.94 | 24.96 | 25.05 | 25.08 | 25.05 | 25.09 | 24.96 | 24.85 | 24.89 | 24.80 | 24.73 | 24.73 |
| <b>antibody + 2 peps</b> | 25.21       | 25.22 | 25.24 | 25.31 | 25.32 | 25.31 | 25.36 | 25.26 | 25.19 | 25.24 | 25.19 | 25.12 | 25.12 |

peptide 2, measurement 4

| ion                      | $\Delta CV$ |       |       |       |       |       |       |       |       |       |       |       |       |
|--------------------------|-------------|-------|-------|-------|-------|-------|-------|-------|-------|-------|-------|-------|-------|
|                          | 2           | 4     | 6     | 8     | 12    | 16    | 20    | 30    | 40    | 50    | 60    | 70    | 80    |
| <b>antibody + 1 pep</b>  | 25.48       | 25.50 | 25.52 | 25.51 | 25.53 | 25.50 | 25.52 | 25.46 | 25.38 | 25.34 | 25.33 | 25.32 | 25.31 |
| <b>antibody + 2 peps</b> | 25.78       | 25.81 | 25.83 | 25.82 | 25.82 | 25.81 | 25.83 | 25.79 | 25.76 | 25.75 | 25.74 | 25.76 | 25.76 |

peptide 2, measurement 5

| ion                      | $\Delta CV$ |       |       |       |       |       |       |       |       |       |       |       |       |
|--------------------------|-------------|-------|-------|-------|-------|-------|-------|-------|-------|-------|-------|-------|-------|
|                          | 2           | 4     | 6     | 8     | 12    | 16    | 20    | 30    | 40    | 50    | 60    | 70    | 80    |
| <b>antibody + 1 pep</b>  | 25.45       | 25.49 | 25.51 | 25.51 | 25.52 | 25.52 | 25.52 | 25.49 | 25.42 | 25.37 | 25.33 | 25.32 | 25.31 |
| <b>antibody + 2 peps</b> | 25.74       | 25.79 | 25.79 | 25.80 | 25.81 | 25.83 | 25.83 | 25.83 | 25.80 | 25.78 | 25.76 | 25.76 | 25.76 |

**Table S19.** Mean charge states of educt ion signals upon gas phase dissociation of anti-Troponin antibody complexed with Troponin I peptide 3.

peptide 3, measurement 1

| ion                      | $\Delta CV$ |       |       |       |       |       |       |       |       |       |       |       |       |
|--------------------------|-------------|-------|-------|-------|-------|-------|-------|-------|-------|-------|-------|-------|-------|
|                          | 2           | 4     | 6     | 8     | 12    | 16    | 20    | 30    | 40    | 50    | 60    | 70    | 80    |
| <b>antibody + 1 pep</b>  | 25.26       | 25.28 | 25.40 | 25.34 | 25.47 | 25.41 | 25.43 | 25.42 | 25.36 | 25.29 | 25.27 | 25.26 | 25.21 |
| <b>antibody + 2 peps</b> | 25.48       | 25.49 | 25.60 | 25.55 | 25.64 | 25.62 | 25.60 | 25.59 | 25.56 | 25.54 | 25.45 | 25.51 | 25.54 |

peptide 3, measurement 2

| ion                      | $\Delta CV$ |       |       |       |       |       |       |       |       |       |       |       |       |
|--------------------------|-------------|-------|-------|-------|-------|-------|-------|-------|-------|-------|-------|-------|-------|
|                          | 2           | 4     | 6     | 8     | 12    | 16    | 20    | 30    | 40    | 50    | 60    | 70    | 80    |
| <b>antibody + 1 pep</b>  | 25.26       | 25.28 | 25.27 | 25.26 | 25.28 | 25.29 | 25.29 | 25.26 | 25.25 | 25.22 | 25.19 | 25.17 | 25.15 |
| <b>antibody + 2 peps</b> | 25.47       | 25.54 | 25.53 | 25.46 | 25.51 | 25.50 | 25.49 | 25.46 | 25.48 | 25.46 | 25.45 | 25.42 | 25.44 |

**Table S20.** Mean charge states of educt ion signals upon gas phase dissociation of anti-Troponin antibody complexed with Troponin I peptide 4.

peptide 4, measurement 1

| ion                      | $\Delta CV$ |       |       |       |       |       |       |       |       |       |       |
|--------------------------|-------------|-------|-------|-------|-------|-------|-------|-------|-------|-------|-------|
|                          | 4           | 8     | 12    | 16    | 20    | 30    | 40    | 50    | 60    | 70    | 80    |
| <b>antibody + 1 pep</b>  | 24.25       | 24.18 | 24.21 | 24.16 | 24.11 | 24.13 | 24.03 | 24.05 | 24.04 | 24.04 | 23.98 |
| <b>antibody + 2 peps</b> | 24.33       | 24.31 | 24.29 | 24.25 | 24.19 | 24.25 | 24.11 | 24.11 | 24.11 | 24.15 | 24.10 |

peptide 4, measurement 2

| ion                      | $\Delta CV$ |       |       |       |       |       |       |       |       |       |       |       |       |
|--------------------------|-------------|-------|-------|-------|-------|-------|-------|-------|-------|-------|-------|-------|-------|
|                          | 2           | 4     | 6     | 8     | 12    | 16    | 20    | 30    | 40    | 50    | 60    | 70    | 80    |
| <b>antibody + 1 pep</b>  | 24.77       | 24.81 | 24.89 | 24.92 | 24.91 | 24.90 | 24.90 | 24.91 | 24.91 | 24.77 | 24.76 | 24.79 | 24.72 |
| <b>antibody + 2 peps</b> | 24.92       | 24.90 | 24.95 | 24.97 | 24.99 | 24.96 | 24.97 | 24.97 | 24.97 | 24.91 | 24.94 | 24.92 | 24.83 |

peptide 4, measurement 3

| ion                      | $\Delta CV$ |       |       |       |       |       |       |       |       |       |       |       |       |
|--------------------------|-------------|-------|-------|-------|-------|-------|-------|-------|-------|-------|-------|-------|-------|
|                          | 2           | 4     | 6     | 8     | 12    | 16    | 20    | 30    | 40    | 50    | 60    | 70    | 80    |
| <b>antibody + 1 pep</b>  | 24.74       | 24.82 | 24.85 | 24.88 | 24.89 | 24.93 | 24.87 | 24.88 | 24.84 | 24.84 | 24.77 | 24.79 | 24.78 |
| <b>antibody + 2 peps</b> | 24.88       | 24.95 | 24.96 | 24.98 | 24.99 | 24.98 | 24.93 | 24.97 | 24.92 | 24.95 | 24.89 | 24.96 | 24.90 |

peptide 4, measurement 4

| ion                      | $\Delta CV$ |       |       |       |       |       |       |       |       |       |       |       |       |
|--------------------------|-------------|-------|-------|-------|-------|-------|-------|-------|-------|-------|-------|-------|-------|
|                          | 2           | 4     | 6     | 8     | 12    | 16    | 20    | 30    | 40    | 50    | 60    | 70    | 80    |
| <b>antibody + 1 pep</b>  | 25.44       | 25.39 | 25.45 | 25.39 | 25.40 | 25.39 | 25.37 | 25.43 | 25.45 | 25.48 | 25.47 | 25.47 | 25.48 |
| <b>antibody + 2 peps</b> | 25.50       | 25.43 | 25.45 | 25.45 | 25.44 | 25.45 | 25.45 | 25.43 | 25.54 | 25.52 | 25.49 | 25.54 | 25.58 |

peptide 4, measurement 5

| ion                      | $\Delta CV$ |       |       |       |       |       |       |       |       |       |       |       |       |
|--------------------------|-------------|-------|-------|-------|-------|-------|-------|-------|-------|-------|-------|-------|-------|
|                          | 2           | 4     | 6     | 8     | 12    | 16    | 20    | 30    | 40    | 50    | 60    | 70    | 80    |
| <b>antibody + 1 pep</b>  | 25.61       | 25.68 | 25.70 | 25.72 | 25.80 | 25.86 | 25.89 | 25.90 | 25.90 | 25.90 | 25.87 | 25.86 | 25.85 |
| <b>antibody + 2 peps</b> | 25.66       | 25.81 | 25.84 | 25.76 | 25.94 | 25.95 | 25.89 | 25.91 | 25.89 | 25.86 | 25.87 | 25.91 | 25.88 |

**Table S21.** Mean charge states of educt ion signals upon gas phase dissociation of anti-Troponin antibody complexed with Troponin I peptide 5.

peptide 5, measurement 1

| ion                      | $\Delta CV$ |       |       |       |       |       |       |       |       |       |       |       |       |
|--------------------------|-------------|-------|-------|-------|-------|-------|-------|-------|-------|-------|-------|-------|-------|
|                          | 2           | 4     | 6     | 8     | 12    | 16    | 20    | 30    | 40    | 50    | 60    | 70    | 80    |
| <b>antibody + 1 pep</b>  | 25.65       | 25.66 | 25.58 | 25.59 | 25.53 | 25.49 | 25.53 | 25.55 | 25.49 | 25.49 | 25.43 | 25.42 | 25.34 |
| <b>antibody + 2 peps</b> | 25.75       | 25.77 | 25.66 | 25.71 | 25.59 | 25.60 | 25.65 | 25.67 | 25.62 | 25.66 | 25.62 | 25.61 | 25.54 |

peptide 5, measurement 2

| ion                      | $\Delta CV$ |       |       |       |       |       |       |       |       |       |       |       |       |
|--------------------------|-------------|-------|-------|-------|-------|-------|-------|-------|-------|-------|-------|-------|-------|
|                          | 2           | 4     | 6     | 8     | 12    | 16    | 20    | 30    | 40    | 50    | 60    | 70    | 80    |
| <b>antibody + 1 pep</b>  | 25.58       | 25.59 | 25.54 | 25.46 | 25.47 | 25.47 | 25.42 | 25.42 | 25.33 | 25.31 | 25.23 | 25.25 | 25.23 |
| <b>antibody + 2 peps</b> | 25.66       | 25.69 | 25.61 | 25.57 | 25.56 | 25.57 | 25.54 | 25.53 | 25.48 | 25.49 | 25.42 | 25.45 | 25.44 |

peptide 5, measurement 3

| ion                      | $\Delta CV$ |       |       |       |       |       |       |       |       |       |       |       |       |
|--------------------------|-------------|-------|-------|-------|-------|-------|-------|-------|-------|-------|-------|-------|-------|
|                          | 2           | 4     | 6     | 8     | 12    | 16    | 20    | 30    | 40    | 50    | 60    | 70    | 80    |
| <b>antibody + 1 pep</b>  | 25.45       | 25.43 | 25.48 | 25.45 | 25.41 | 25.51 | 25.50 | 25.46 | 25.39 | 25.30 | 25.29 | 25.28 | 25.28 |
| <b>antibody + 2 peps</b> | 25.59       | 25.55 | 25.60 | 25.58 | 25.53 | 25.60 | 25.60 | 25.58 | 25.53 | 25.44 | 25.48 | 25.46 | 25.47 |

peptide 5, measurement 4

| ion                      | $\Delta CV$ |       |       |       |       |       |       |       |       |       |       |       |       |
|--------------------------|-------------|-------|-------|-------|-------|-------|-------|-------|-------|-------|-------|-------|-------|
|                          | 2           | 4     | 6     | 8     | 12    | 16    | 20    | 30    | 40    | 50    | 60    | 70    | 80    |
| <b>antibody + 1 pep</b>  | 25.50       | 25.53 | 25.53 | 25.52 | 25.55 | 25.56 | 25.58 | 25.57 | 25.54 | 25.54 | 25.51 | 25.54 | 25.52 |
| <b>antibody + 2 peps</b> | 25.71       | 25.74 | 25.74 | 25.72 | 25.77 | 25.75 | 25.80 | 25.80 | 25.78 | 25.77 | 25.77 | 25.79 | 25.79 |

peptide 5, measurement 5

| ion                      | $\Delta CV$ |       |       |       |       |       |       |       |       |       |       |       |       |
|--------------------------|-------------|-------|-------|-------|-------|-------|-------|-------|-------|-------|-------|-------|-------|
|                          | 2           | 4     | 6     | 8     | 12    | 16    | 20    | 30    | 40    | 50    | 60    | 70    | 80    |
| <b>antibody + 1 pep</b>  | 25.59       | 25.59 | 25.61 | 25.62 | 25.62 | 25.67 | 25.63 | 25.52 | 25.49 | 25.53 | 25.55 | 25.54 | 25.55 |
| <b>antibody + 2 peps</b> | 25.85       | 25.83 | 25.82 | 25.85 | 25.83 | 25.90 | 25.80 | 25.74 | 25.70 | 25.77 | 25.74 | 25.79 | 25.83 |

**Table S22.** Mean charge states of educt ion signals upon gas phase dissociation of anti-Troponin antibody complexed with Troponin I peptide 6.

peptide 6, measurement 1

| ion                      | $\Delta CV$ |       |       |       |       |       |       |       |       |       |       |
|--------------------------|-------------|-------|-------|-------|-------|-------|-------|-------|-------|-------|-------|
|                          | 4           | 8     | 12    | 16    | 20    | 30    | 40    | 50    | 60    | 70    | 80    |
| <b>antibody + 1 pep</b>  | 24.47       | 24.49 | 24.52 | 24.59 | 24.68 | 24.62 | 24.63 | 24.59 | 24.60 | 24.61 | 24.58 |
| <b>antibody + 2 peps</b> | 24.70       | 24.67 | 24.71 | 24.77 | 24.85 | 24.81 | 24.84 | 24.81 | 24.78 | 24.81 | 24.81 |

peptide 6, measurement 2

| ion                      | $\Delta CV$ |       |       |       |       |       |       |       |       |       |       |
|--------------------------|-------------|-------|-------|-------|-------|-------|-------|-------|-------|-------|-------|
|                          | 4           | 8     | 12    | 16    | 20    | 30    | 40    | 50    | 60    | 70    | 80    |
| <b>antibody + 1 pep</b>  | 25.41       | 25.42 | 25.50 | 25.52 | 25.49 | 25.47 | 25.51 | 25.46 | 25.36 | 25.32 | 25.28 |
| <b>antibody + 2 peps</b> | 25.66       | 25.65 | 25.74 | 25.78 | 25.79 | 25.74 | 25.75 | 25.72 | 25.64 | 25.61 | 25.54 |

peptide 6, measurement 3

| ion                      | $\Delta CV$ |       |       |       |       |       |       |       |       |       |       |       |       |
|--------------------------|-------------|-------|-------|-------|-------|-------|-------|-------|-------|-------|-------|-------|-------|
|                          | 2           | 4     | 6     | 8     | 12    | 16    | 20    | 30    | 40    | 50    | 60    | 70    | 80    |
| <b>antibody + 1 pep</b>  | 25.44       | 25.46 | 25.47 | 25.47 | 25.46 | 25.49 | 25.50 | 25.52 | 25.53 | 25.82 | 25.86 | 25.96 | 25.91 |
| <b>antibody + 2 peps</b> | 25.69       | 25.69 | 25.73 | 25.68 | 25.72 | 25.75 | 25.75 | 25.77 | 25.76 | 26.04 | 26.10 | 26.19 | 26.15 |

peptide 6, measurement 4

| ion                      | $\Delta CV$ |       |       |       |       |       |       |       |       |       |       |       |       |
|--------------------------|-------------|-------|-------|-------|-------|-------|-------|-------|-------|-------|-------|-------|-------|
|                          | 2           | 4     | 6     | 8     | 12    | 16    | 20    | 30    | 40    | 50    | 60    | 70    | 80    |
| <b>antibody + 1 pep</b>  | 25.83       | 25.82 | 25.81 | 25.86 | 25.85 | 25.93 | 25.94 | 25.95 | 25.95 | 25.89 | 25.91 | 25.90 | 25.83 |
| <b>antibody + 2 peps</b> | 26.09       | 26.10 | 26.03 | 26.08 | 26.10 | 26.14 | 26.18 | 26.20 | 26.19 | 26.17 | 26.11 | 26.15 | 26.11 |

**TableS 23.** Mean charge states of educt ion signals upon gas phase dissociation of anti-Troponin antibody complexed with Troponin I peptide 7.

peptide 7, measurement 1

| ion | $\Delta CV$ |   |   |   |    |    |    |    |    |    |    |    |    |
|-----|-------------|---|---|---|----|----|----|----|----|----|----|----|----|
|     | 2           | 4 | 6 | 8 | 12 | 16 | 20 | 30 | 40 | 50 | 60 | 70 | 80 |



|                          |       |       |       |       |       |       |       |       |       |       |       |       |       |
|--------------------------|-------|-------|-------|-------|-------|-------|-------|-------|-------|-------|-------|-------|-------|
| <b>antibody + 1 pep</b>  | 26.02 | 26.09 | 26.10 | 26.18 | 26.17 | 26.16 | 26.16 | 26.18 | 26.12 | 26.11 | 26.08 | 26.08 | 26.04 |
| <b>antibody + 2 peps</b> | 26.00 | 26.11 | 26.09 | 26.12 | 26.09 | 26.04 | 26.25 | 26.08 | 25.97 | 25.99 | 25.80 | 26.48 | 26.29 |

peptide 7, measurement 2

| ion                      | $\Delta CV$ |       |       |       |       |       |       |       |       |       |       |       |       |
|--------------------------|-------------|-------|-------|-------|-------|-------|-------|-------|-------|-------|-------|-------|-------|
|                          | 2           | 4     | 6     | 8     | 12    | 16    | 20    | 30    | 40    | 50    | 60    | 70    | 80    |
| <b>antibody + 1 pep</b>  | 26.17       | 26.10 | 26.08 | 26.10 | 26.15 | 26.19 | 26.20 | 26.14 | 26.15 | 26.10 | 26.12 | 26.09 | 26.11 |
| <b>antibody + 2 peps</b> | 26.28       | 26.20 | 26.00 | 25.95 | 26.30 | 26.26 | 26.25 | 26.20 | 25.94 | 25.91 | 25.93 | 26.34 | n.d.  |

**Table S24.** Secondary structure category distribution of amino acid residues of hcTn I epitope peptides over the entire 50 ns simulation time.

| peptide no.          | amino acid sequence <sup>b)</sup> | secondary structure category <sup>a)</sup> |                |                 |       |       |                 |              |                   |       | helical content |  |
|----------------------|-----------------------------------|--------------------------------------------|----------------|-----------------|-------|-------|-----------------|--------------|-------------------|-------|-----------------|--|
|                      |                                   | coil                                       | $\beta$ -sheet | $\beta$ -bridge | bend  | turn  | $\alpha$ -helix | $\pi$ -helix | $^3/_{10}$ -helix |       |                 |  |
| 1 (wt)               | ENREVG <u>DWRKN</u> IDAL          | 36371                                      | 0              | 0               | 3368  | 12925 | 94726           | 5            | 2605              | 97336 | (65%)           |  |
| 2 (R186Q)            | EN <u>Q</u> EVGDWRKNIDAL          | 38617                                      | 0              | 0               | 4570  | 16335 | 88447           | 5            | 2026              | 90478 | (60%)           |  |
| 3 (R192H)            | ENREVG <u>DW</u> <u>H</u> KNIDAL  | 54692                                      | 0              | 0               | 24741 | 17600 | 29252           | 0            | 23715             | 52967 | (35%)           |  |
| 4 (R192L)            | ENREVG <u>DW</u> <u>L</u> KNIDAL  | 54017                                      | 0              | 0               | 5038  | 15453 | 71559           | 180          | 3753              | 75492 | (50%)           |  |
| 5 (R192C)            | ENREVG <u>DW</u> <u>C</u> KNIDAL  | 60712                                      | 0              | 11              | 21860 | 27114 | 17158           | 661          | 22484             | 40303 | (27%)           |  |
| 6 (D190G)            | ENREVG <u>G</u> WRKNIDAL          | 70970                                      | 28             | 515             | 26646 | 31385 | 17911           | 0            | 2545              | 20456 | (14%)           |  |
| 7 (R192P)            | ENREVG <u>DW</u> <u>P</u> KNIDAL  | 69375                                      | 0              | 657             | 35179 | 18037 | 17918           | 0            | 8834              | 26752 | (18%)           |  |
| 8 (R192P)<br>(K193E) | ENREVG <u>DW</u> <u>P</u> ENIDAL  | 49985                                      | 0              | 0               | 18306 | 37204 | 22674           | 1674         | 20157             | 44505 | (30%)           |  |

a) color coding as in Figure 5 and in Suppl. Figure 21

b) aa184-aa198 from Tn I (UniProt: P19429); the epitope region of the monoclonal anti-hcTn I antibody is underlined; amino acid exchanges in peptides 2-8 are printed in color

**Table S25.** Secondary structure category distribution of amino acid residues of hcTn I epitope peptides over the first 25 ns simulation time.

| peptide no.          | amino acid sequence <sup>b)</sup> | secondary structure category <sup>a)</sup> |                |                 |       |       |                 |              |                   |       | helical content |  |
|----------------------|-----------------------------------|--------------------------------------------|----------------|-----------------|-------|-------|-----------------|--------------|-------------------|-------|-----------------|--|
|                      |                                   | coil                                       | $\beta$ -sheet | $\beta$ -bridge | bend  | turn  | $\alpha$ -helix | $\pi$ -helix | $^3/_{10}$ -helix |       |                 |  |
| 1 (wt)               | ENREVG <u>DWRKN</u> IDAL          | 16889                                      | 0              | 0               | 198   | 6898  | 49750           | 5            | 1260              | 51015 | (68%)           |  |
| 2 (R186Q)            | EN <u>Q</u> EVGDWRKNIDAL          | 19611                                      | 0              | 0               | 3450  | 8666  | 42700           | 0            | 573               | 43273 | (58%)           |  |
| 3 (R192H)            | ENREVG <u>DW</u> <u>H</u> KNIDAL  | 27633                                      | 0              | 0               | 6245  | 9816  | 23645           | 0            | 7661              | 31306 | (42%)           |  |
| 4 (R192L)            | ENREVG <u>DW</u> <u>L</u> KNIDAL  | 27514                                      | 0              | 0               | 3403  | 7106  | 34994           | 0            | 1983              | 36977 | (49%)           |  |
| 5 (R192C)            | ENREVG <u>DW</u> <u>C</u> KNIDAL  | 21198                                      | 0              | 5               | 10264 | 15993 | 15970           | 661          | 10909             | 27540 | (37%)           |  |
| 6 (D190G)            | ENREVG <u>G</u> WRKNIDAL          | 30462                                      | 28             | 513             | 10680 | 14423 | 16489           | 0            | 2405              | 18894 | (25%)           |  |
| 7 (R192P)            | ENREVG <u>DW</u> <u>P</u> KNIDAL  | 30224                                      | 0              | 42              | 11817 | 10809 | 17874           | 0            | 4234              | 22108 | (29%)           |  |
| 8 (R192P)<br>(K193E) | ENREVG <u>DW</u> <u>P</u> ENIDAL  | 22543                                      | 0              | 0               | 8273  | 18331 | 15581           | 1674         | 8598              | 25853 | (34%)           |  |

a) color coding as in Figure 5 and in Suppl. Figure 21

b) aa184-aa198 from Tn I (UniProt: P19429); the epitope region of the monoclonal anti-hcTn I antibody is underlined; amino acid exchanges in peptides 2-8 are printed in color

**Table S26.** Secondary structure category distribution of amino acid residues of hcTn I epitope peptides over the last 25 ns simulation time.

| peptide no. | amino acid sequence <sup>b)</sup> | secondary structure category <sup>a)</sup> |                |                 |       |       |                 |              |                        |                 |       |
|-------------|-----------------------------------|--------------------------------------------|----------------|-----------------|-------|-------|-----------------|--------------|------------------------|-----------------|-------|
|             |                                   | coil                                       | $\beta$ -sheet | $\beta$ -bridge | bend  | turn  | $\alpha$ -helix | $\pi$ -helix | <sup>3</sup> /10-helix | helical content |       |
| 1 (wt)      | ENREVG <u>DWRKN</u> IDAL          | 19470                                      | 0              | 0               | 3170  | 6027  | 44985           | 5            | 1348                   | 46333           | (62%) |
| 2 (R186Q)   | EN <u>Q</u> EVGDWRKNIDAL          | 18996                                      | 0              | 0               | 1120  | 7669  | 45754           |              | 1456                   | 47215           | (63%) |
| 3 (R192H)   | ENREVG <u>DW</u> <u>H</u> KNIDAL  | 27048                                      | 0              | 0               | 18501 | 7785  | 5607            |              | 16059                  | 21666           | (29%) |
| 4 (R192L)   | ENREVG <u>DW</u> <u>L</u> KNIDAL  | 26493                                      | 0              | 0               | 1635  | 8350  | 36572           | 180          | 1770                   | 38522           | (51%) |
| 5 (R192C)   | ENREVG <u>DW</u> <u>C</u> KNIDAL  | 39507                                      | 0              | 6               | 11597 | 11124 | 1188            |              | 11578                  | 12766           | (17%) |
| 6 (D190G)   | ENREVG <u>G</u> WRKNIDAL          | 40499                                      | 0              | 2               | 15970 | 16963 | 1426            |              | 140                    | 1566            | (2%)  |
| 7 (R192P)   | ENREVG <u>DW</u> <u>P</u> KNIDAL  | 39142                                      | 0              | 615             | 23368 | 7228  | 44              |              | 4603                   | 4647            | (6%)  |

|                      |                                  |       |   |   |       |       |      |  |       |             |
|----------------------|----------------------------------|-------|---|---|-------|-------|------|--|-------|-------------|
| 8 (R192P)<br>(K193E) | ENREVG <u>DW</u> <u>TE</u> NIDAL | 27432 | 0 | 0 | 10034 | 18882 | 7093 |  | 11559 | 18652 (25%) |
|----------------------|----------------------------------|-------|---|---|-------|-------|------|--|-------|-------------|

a) color coding as in Figure 5 and in Suppl. Figure 21

b) aa184-aa198 from Tn I (UniProt: P19429); the epitope region of the monoclonal anti-hcTn I antibody is underlined; amino acid exchanges in peptides 2-8 are printed in color

**TableS 27.** Protonation states, solvated charges, and pI values of hcTn I epitope peptides.

| peptide no. | amino acid sequence <sup>a)</sup>    | pI <sup>b)</sup> | solvated charge | charge positions                                                                                                                               |
|-------------|--------------------------------------|------------------|-----------------|------------------------------------------------------------------------------------------------------------------------------------------------|
| 1           | ENREVG <u>DWRKNID</u> AL             | 4.6              | -1              | E <sup>0(-1+1)</sup> NR <sup>+1</sup> E <sup>-1</sup> VGD <sup>-1</sup> WR <sup>+1</sup> K <sup>+1</sup> NID <sup>-</sup><br>1AL <sup>-1</sup> |
| 2           | EN <b>Q</b> EVGDWRKNIDA<br>L         | 4.1              | -2              | E <sup>0(-1+1)</sup> NQE <sup>-1</sup> VGD <sup>-1</sup> WR <sup>+1</sup> K <sup>+1</sup> NID <sup>-</sup><br>1AL <sup>-1</sup>                |
| 3           | ENREVG <u>DW</u> <b>H</b> KNIDA<br>L | 4.6              | -1              | E <sup>0(-1+1)</sup> NR <sup>+1</sup> E <sup>-1</sup> VGD <sup>-1</sup> WH <sup>+1</sup> K <sup>+1</sup> NID <sup>-</sup><br>1AL <sup>-1</sup> |
| 4           | ENREVG <u>DW</u> <b>L</b> KNIDAL     | 4.1              | -2              | E <sup>0(-1+1)</sup> NR <sup>+1</sup> E <sup>-1</sup> VGD <sup>-1</sup> WLK <sup>+1</sup> NID <sup>-</sup><br>1AL <sup>-1</sup>                |
| 5           | ENREVG <u>DW</u> <b>C</b> KNIDAL     | 4.1              | -2              | E <sup>0(-1+1)</sup> NR <sup>+1</sup> E <sup>-1</sup> VGD <sup>-1</sup> WR <sup>+1</sup> K <sup>+1</sup> NID <sup>-</sup><br>1AL <sup>-1</sup> |
| 6           | ENREVG <b>G</b> WRKNIDAL             | 7.1              | 0               | E <sup>0(-1+1)</sup> NR <sup>+1</sup> E <sup>-1</sup> VGGWR <sup>+1</sup> K <sup>+1</sup> NID <sup>-</sup><br>1AL <sup>-1</sup>                |
| 7           | ENREVG <u>DW</u> <b>T</b> KNIDAL     | 4.1              | -2              | E <sup>0(-1+1)</sup> NR <sup>+1</sup> E <sup>-1</sup> VGD <sup>-1</sup> WPK <sup>+1</sup> NID <sup>-</sup><br>1AL <sup>-1</sup>                |
| 8           | ENREVG <u>DW</u> <b>P</b> ENIDAL     | 3.5              | -4              | E <sup>0(-1+1)</sup> NR <sup>+1</sup> E <sup>-1</sup> VGD <sup>-1</sup> WPE <sup>-1</sup> NID <sup>-</sup><br>1AL <sup>-1</sup>                |

a) aa184-aa198 from Tn I (UniProt: P19429); the epitope region of the monoclonal anti-hcTroponin I antibody (clone MF4, ab38210 from abcam) is underlined; amino acid exchanges in peptides 2-8 are printed in bold and are colored

b) <https://www.ncbi.nlm.nih.gov/clinvar/>; n.a.: not applicable

**Table S28.** Solvent accessible surface areas (SASAs) of single amino acids of hcTn I epitope peptide 1.

| residue No. | residue | SASA before sim. <sup>a)</sup> | SASA after sim. <sup>b)</sup> | SASA difference <sup>c)</sup> |
|-------------|---------|--------------------------------|-------------------------------|-------------------------------|
| 1           | GLU     | 162.38                         | 217.03                        | 54.65                         |
| 2           | ASN     | 70.39                          | 44.04                         | -26.35                        |
| 3           | ARG     | 154.37                         | 218.09                        | 63.72                         |
| 4           | GLU     | 105.48                         | 128.51                        | 23.03                         |
| 5           | VAL     | 93.09                          | 81.89                         | -11.20                        |
| 6           | GLY     | 1.11                           | 46.75                         | 45.64                         |
| 7           | ASP     | 69.96                          | 64.60                         | -5.36                         |
| 8           | TRP     | 155.60                         | 124.97                        | -30.63                        |
| 9           | ARG     | 98.86                          | 149.53                        | 50.67                         |
| 10          | LYS     | 76.07                          | 112.99                        | 36.92                         |
| 11          | ASN     | 93.97                          | 85.10                         | -8.87                         |
| 12          | ILE     | 98.07                          | 113.10                        | 15.03                         |
| 13          | ASP     | 96.79                          | 104.67                        | 7.88                          |
| 14          | ALA     | 85.96                          | 47.72                         | -38.24                        |
| 15          | LEU     | 184.75                         | 237.82                        | 53.07                         |

a) SASA calculation with initial structure model of the peptide

b) SASA calculation after atomistic molecular dynamics simulations for 50 ns

c) Difference of SASA values: (SASA after sim. – SASA before sim.). Values are color coded: -20-20: white, 20-60: light green, >60: green, -20 - -60: light red, <-60: red

**Table S29.** Solvent accessible surface areas (SASAs) of single amino acids of hcTn I epitope peptide 2.

| residue No. <sup>a)</sup> | residue <sup>a)</sup> | SASA before sim. <sup>b)</sup> | SASA after sim. <sup>c)</sup> | SASA difference <sup>d)</sup> |
|---------------------------|-----------------------|--------------------------------|-------------------------------|-------------------------------|
| 1                         | GLU                   | 164.69                         | 170.81                        | 6.12                          |
| 2                         | ASN                   | 155.84                         | 101.81                        | -54.03                        |
| <b>3</b>                  | <b>GLN</b>            | 138.74                         | 164.72                        | 25.98                         |
| 4                         | GLU                   | 106.48                         | 144.99                        | 38.51                         |
| 5                         | VAL                   | 102.83                         | 50.32                         | -52.51                        |
| 6                         | GLY                   | 45.44                          | 39.24                         | -6.20                         |
| 7                         | ASP                   | 90.57                          | 103.56                        | 12.99                         |
| 8                         | TRP                   | 158.32                         | 139.37                        | -18.95                        |
| 9                         | ARG                   | 127.77                         | 127.27                        | -0.50                         |
| 10                        | LYS                   | 137.50                         | 132.14                        | -5.36                         |
| 11                        | ASN                   | 86.69                          | 72.31                         | -14.38                        |
| 12                        | ILE                   | 85.32                          | 94.78                         | 9.46                          |
| 13                        | ASP                   | 97.34                          | 119.57                        | 22.23                         |
| 14                        | ALA                   | 83.27                          | 65.02                         | -18.25                        |
| 15                        | LEU                   | 190.21                         | 182.41                        | -7.80                         |

a) amino acid exchange is printed in bold and is colored

b) SASA calculation with initial structure model of the peptide

c) SASA calculation after atomistic molecular dynamics simulations for 50 ns

d) Difference of SASA values: (SASA after sim. – SASA before sim.). Values are color coded: -20-20: white, 20-60: light green, >60: green, -20 - -60: light red, <-60: red

**Table S30.** Solvent accessible surface areas (SASAs) of single amino acids of hcTn I epitope peptide 3.

| residue No. <sup>a)</sup> | residue <sup>a)</sup> | SASA before sim. <sup>b)</sup> | SASA after sim. <sup>c)</sup> | SASA difference <sup>d)</sup> |
|---------------------------|-----------------------|--------------------------------|-------------------------------|-------------------------------|
| 1                         | GLU                   | 173.68                         | 109.46                        | -64.22                        |
| 2                         | ASN                   | 73.76                          | 28.76                         | -45.00                        |
| 3                         | ARG                   | 175.83                         | 167.60                        | -8.23                         |
| 4                         | GLU                   | 119.09                         | 105.92                        | -13.17                        |
| 5                         | VAL                   | 72.96                          | 154.84                        | 81.88                         |
| 6                         | GLY                   | 4.96                           | 16.47                         | 11.51                         |
| 7                         | ASP                   | 92.66                          | 124.49                        | 31.83                         |
| 8                         | TRP                   | 148.91                         | 158.22                        | 9.31                          |
| <b>9</b>                  | <b>HIS</b>            | 92.26                          | 28.54                         | -63.72                        |
| 10                        | LYS                   | 108.60                         | 121.18                        | 12.58                         |
| 11                        | ASN                   | 85.90                          | 128.53                        | 42.63                         |
| 12                        | ILE                   | 81.90                          | 130.12                        | 48.22                         |
| 13                        | ASP                   | 129.92                         | 47.44                         | -82.48                        |
| 14                        | ALA                   | 83.78                          | 59.40                         | -24.38                        |
| 15                        | LEU                   | 191.78                         | 180.43                        | -11.35                        |

a) amino acid exchange is printed in bold and is colored

b) SASA calculation with initial structure model of the peptide

c) SASA calculation after atomistic molecular dynamics simulations for 50 ns

d) Difference of SASA values: (SASA after sim. – SASA before sim.). Values are color coded: -20-20: white, 20-60: light green, >60: green, -20 - -60: light red, <-60: red

**Table S31.** Solvent accessible surface areas (SASAs) of single amino acids of hcTn I epitope peptide 4.

| residue No. <sup>a)</sup> | residue <sup>a)</sup> | SASA before sim. <sup>b)</sup> | SASA after sim. <sup>c)</sup> | SASA difference <sup>d)</sup> |
|---------------------------|-----------------------|--------------------------------|-------------------------------|-------------------------------|
| 1                         | GLU                   | 167.14                         | 223.72                        | 56.58                         |
| 2                         | ASN                   | 135.63                         | 136.48                        | 0.85                          |
| 3                         | ARG                   | 196.24                         | 123.53                        | -72.71                        |
| 4                         | GLU                   | 149.40                         | 134.55                        | -14.85                        |
| 5                         | VAL                   | 96.21                          | 102.19                        | 5.98                          |
| 6                         | GLY                   | 32.38                          | 41.82                         | 9.44                          |
| 7                         | ASP                   | 65.54                          | 81.00                         | 15.46                         |
| 8                         | TRP                   | 156.94                         | 142.82                        | -14.12                        |
| <b>9</b>                  | <b>LEU</b>            | 87.69                          | 113.93                        | 26.24                         |
| 10                        | LYS                   | 97.62                          | 136.94                        | 39.32                         |
| 11                        | ASN                   | 79.67                          | 59.92                         | -19.75                        |
| 12                        | ILE                   | 94.69                          | 121.04                        | 26.35                         |
| 13                        | ASP                   | 113.51                         | 127.57                        | 14.06                         |
| 14                        | ALA                   | 84.18                          | 63.27                         | -20.91                        |
| 15                        | LEU                   | 193.16                         | 190.31                        | -2.85                         |

a) amino acid exchange is printed in bold and is colored

b) SASA calculation with initial structure model of the peptide

c) SASA calculation after atomistic molecular dynamics simulations for 50 ns

d) Difference of SASA values: (SASA after sim. – SASA before sim.). Values are color coded: -20-20: white, 20-60: light green, >60: green, -20 - -60: light red, <-60: red

**Table S32.** Solvent accessible surface areas (SASAs) of single amino acids of hcTn I epitope peptide 5.

| residue No. <sup>a)</sup> | residue <sup>a)</sup> | SASA before sim. <sup>b)</sup> | SASA after sim. <sup>c)</sup> | SASA difference <sup>d)</sup> |
|---------------------------|-----------------------|--------------------------------|-------------------------------|-------------------------------|
| 1                         | GLU                   | 170.27                         | 144.76                        | -25.51                        |
| 2                         | ASN                   | 79.67                          | 117.54                        | 37.87                         |
| 3                         | ARG                   | 155.75                         | 166.74                        | 10.99                         |
| 4                         | GLU                   | 144.80                         | 46.33                         | -98.47                        |
| 5                         | VAL                   | 83.27                          | 121.59                        | 38.32                         |
| 6                         | GLY                   | 7.77                           | 13.75                         | 5.98                          |
| 7                         | ASP                   | 50.97                          | 149.08                        | 98.11                         |
| 8                         | TRP                   | 150.74                         | 189.46                        | 38.72                         |
| <b>9</b>                  | <b>CYS</b>            | 49.44                          | 62.35                         | 12.91                         |
| 10                        | LYS                   | 109.33                         | 157.37                        | 48.04                         |
| 11                        | ASN                   | 97.69                          | 26.67                         | -71.02                        |
| 12                        | ILE                   | 84.91                          | 144.14                        | 59.23                         |
| 13                        | ASP                   | 127.96                         | 129.62                        | 1.66                          |
| 14                        | ALA                   | 82.83                          | 49.88                         | -32.95                        |
| 15                        | LEU                   | 188.45                         | 231.85                        | 43.40                         |

a) amino acid exchange is printed in bold and is colored

b) SASA calculation with initial structure model of the peptide

- c) SASA calculation after atomistic molecular dynamics simulations for 50 ns  
d) Difference of SASA values: (SASA after sim. – SASA before sim.). Values are color coded: -20-20: white, 20-60: light green, >60: green, -20 - -60: light red, <-60: red

**Table S33.** Solvent accessible surface areas (SASAs) of single amino acids of hcTn I epitope peptide 6.

| residue No. <sup>a)</sup> | residue <sup>a)</sup> | SASA before sim. <sup>b)</sup> | SASA after sim. <sup>c)</sup> | SASA difference <sup>d)</sup> |
|---------------------------|-----------------------|--------------------------------|-------------------------------|-------------------------------|
| 1                         | GLU                   | 143.73                         | 82.56                         | -61.17                        |
| 2                         | ASN                   | 156.59                         | 147.80                        | -8.79                         |
| 3                         | ARG                   | 232.83                         | 150.22                        | -82.61                        |
| 4                         | GLU                   | 59.70                          | 51.38                         | -8.32                         |
| 5                         | VAL                   | 131.87                         | 147.51                        | 15.64                         |
| 6                         | GLY                   | 84.30                          | 91.72                         | 7.42                          |
| <b>7</b>                  | <b>GLY</b>            | 15.08                          | 37.88                         | 22.80                         |
| 8                         | TRP                   | 162.79                         | 94.09                         | -68.70                        |
| 9                         | ARG                   | 114.11                         | 131.33                        | 17.22                         |
| 10                        | LYS                   | 100.14                         | 129.56                        | 29.42                         |
| 11                        | ASN                   | 94.15                          | 132.62                        | 38.47                         |
| 12                        | ILE                   | 78.04                          | 122.89                        | 44.85                         |
| 13                        | ASP                   | 105.63                         | 36.26                         | -69.37                        |
| 14                        | ALA                   | 88.91                          | 67.74                         | -21.17                        |
| 15                        | LEU                   | 183.26                         | 148.94                        | -34.32                        |

- a) Amino acid exchange is printed in bold and is colored  
b) SASA calculation with initial structure model of the peptide  
c) SASA calculation after atomistic molecular dynamics simulations for 50 ns  
d) Difference of SASA values: (SASA after sim. – SASA before sim.). Values are color coded: -20-20: white, 20-60: light green, >60: green, -20 - -60: light red, <-60: red

**Table S34.** Solvent accessible surface areas (SASAs) of single amino acids of hcTn I epitope peptide 7.

| residue No. <sup>a)</sup> | residue <sup>a)</sup> | SASA before sim. <sup>b)</sup> | SASA after sim. <sup>c)</sup> | SASA difference <sup>d)</sup> |
|---------------------------|-----------------------|--------------------------------|-------------------------------|-------------------------------|
| 1                         | GLU                   | 128.43                         | 215.13                        | 86.70                         |
| 2                         | ASN                   | 117.69                         | 155.28                        | 37.59                         |
| 3                         | ARG                   | 103.29                         | 89.65                         | -13.64                        |
| 4                         | GLU                   | 144.53                         | 178.70                        | 34.17                         |
| 5                         | VAL                   | 116.45                         | 62.04                         | -54.41                        |
| 6                         | GLY                   | 67.00                          | 33.24                         | -33.76                        |
| 7                         | ASP                   | 105.23                         | 165.56                        | 60.33                         |
| 8                         | TRP                   | 143.31                         | 192.29                        | 48.98                         |
| <b>9</b>                  | <b>PRO</b>            | 2.25                           | 46.05                         | 43.80                         |
| 10                        | LYS                   | 81.56                          | 198.91                        | 117.35                        |
| 11                        | ASN                   | 88.39                          | 88.78                         | 0.39                          |
| 12                        | ILE                   | 94.53                          | 159.11                        | 64.58                         |
| 13                        | ASP                   | 75.54                          | 117.57                        | 42.03                         |
| 14                        | ALA                   | 84.54                          | 45.49                         | -39.05                        |

|    |     |        |        |       |
|----|-----|--------|--------|-------|
| 15 | LEU | 181.13 | 211.12 | 29.99 |
|----|-----|--------|--------|-------|

a) Amino acid exchange is printed in bold and is colored  
b) SASA calculation with initial structure model of the peptide  
c) SASA calculation after atomistic molecular dynamics simulations for 50 ns  
d) Difference of SASA values: (SASA after sim. – SASA before sim.). Values are color coded: -20-20: white, 20-60: light green, >60: green, -20 - -60: light red, <-60: red

**Table S35.** Solvent accessible surface areas (SASAs) of single amino acids of hcTn I epitope peptide 8.

| residue No. <sup>a)</sup> | residue <sup>a)</sup> | SASA before sim. <sup>b)</sup> | SASA after sim. <sup>c)</sup> | SASA difference <sup>d)</sup> |
|---------------------------|-----------------------|--------------------------------|-------------------------------|-------------------------------|
| 1                         | GLU                   | 163.95                         | 179.78                        | 15.83                         |
| 2                         | ASN                   | 119.03                         | 93.09                         | -25.94                        |
| 3                         | ARG                   | 159.85                         | 168.74                        | 8.89                          |
| 4                         | GLU                   | 111.33                         | 133.77                        | 22.44                         |
| 5                         | VAL                   | 135.54                         | 103.29                        | -32.25                        |
| 6                         | GLY                   | 67.89                          | 57.85                         | -10.04                        |
| 7                         | ASP                   | 33.56                          | 70.86                         | 37.30                         |
| 8                         | TRP                   | 165.01                         | 122.01                        | -43.00                        |
| <b>9</b>                  | <b>PRO</b>            | 63.89                          | 51.29                         | -12.60                        |
| <b>10</b>                 | <b>GLU</b>            | 135.88                         | 126.05                        | -9.83                         |
| 11                        | ASN                   | 33.92                          | 116.56                        | 82.64                         |
| 12                        | ILE                   | 95.47                          | 126.00                        | 30.53                         |
| 13                        | ASP                   | 131.91                         | 121.00                        | -10.91                        |
| 14                        | ALA                   | 84.66                          | 85.45                         | 0.79                          |
| 15                        | LEU                   | 177.04                         | 231.06                        | 54.02                         |

a) Amino acid exchange is printed in bold and is colored  
b) SASA calculation with initial structure model of the peptide  
c) SASA calculation after atomistic molecular dynamics simulations for 50 ns  
d) Difference of SASA values: (SASA after sim. – SASA before sim.). Values are color coded: -20-20: white, 20-60: light green, >60: green, -20 - -60: light red, <-60: red
